# Supplementary material
Source: PubMed Central journal article supplement (PMC5114024)

# Supporting Information

## Simplexolides A–E and Plakorfuran A, Six Butyrate Derived Polyketides from the Marine Sponge *Plakortis simplex*

Xiang-Fang Liu <sup>a,b</sup>, Yang Shen <sup>b,\*</sup>, Fan Yang <sup>a,c</sup>, Mark T. Hamann <sup>c</sup>, Wei-Hua Jiao <sup>a</sup>,  
Hong-Jun Zhang <sup>a</sup>, Wan-Sheng Chen <sup>a</sup>, and Hou-Wen Lin <sup>a,\*</sup>

<sup>a</sup> *Laboratory of Marine Drugs, Department of Pharmacy, Changzheng Hospital, Second Military Medical University, Shanghai 200003, People's Republic of China*

<sup>b</sup> *Department of Pharmacy, Shanghai Children's Hospital, Shanghai Jiao Tong University, 1400 West Beijing Road, Shanghai 200040, People's Republic of China*

<sup>c</sup> *Department of Pharmacognosy and the National Center for Natural Products Research (NCNPR), School of Pharmacy, The University of Mississippi, University, MS 38677, USA*

---

\* Corresponding authors. Tel./fax: +86 21 65585154 (H.-W. Lin), Tel.: +86 21 62792098 (Y. Shen); e-mail address: franklin67@126.com (H.-W. Lin), shenyang@medmail.com.cn (Y. Shen).

## Contents

- S4. **Figure S1.** High resolution ESI mass spectrum of simplexolide A (**1**).
- S5. **Figure S2.** IR spectrum of simplexolide A (**1**).
- S6. **Figure S3.**  $^1\text{H}$  NMR spectrum of simplexolide A (**1**) in  $\text{CDCl}_3$ .
- S7. **Figure S4.**  $^{13}\text{C}$  NMR spectrum of simplexolide A (**1**) in  $\text{CDCl}_3$ .
- S8. **Figure S5.**  $^1\text{H}$ - $^1\text{H}$  COSY spectrum of simplexolide A (**1**)  $\text{CDCl}_3$ .
- S9. **Figure S6.** HSQC spectrum of simplexolide A (**1**) in  $\text{CDCl}_3$ .
- S10. **Figure S7.** HMBC spectrum of simplexolide A (**1**) in  $\text{CDCl}_3$ .
- S11. **Figure S8.** NOESY spectrum of simplexolide A (**1**) in  $\text{CDCl}_3$ .
- S12. **Figure S9.** High resolution ESI mass spectrum of simplexolide B (**2**).
- S13. **Figure S10.** IR spectrum of simplexolide B (**2**).
- S14. **Figure S11.**  $^1\text{H}$  NMR spectrum of simplexolide B (**2**) in  $\text{CDCl}_3$ .
- S15. **Figure S12.**  $^{13}\text{C}$  NMR spectrum of simplexolide B (**2**) in  $\text{CDCl}_3$ .
- S16. **Figure S13.**  $^1\text{H}$ - $^1\text{H}$  COSY spectrum of simplexolide B (**2**)  $\text{CDCl}_3$ .
- S17. **Figure S14.** HSQC spectrum of simplexolide B (**2**) in  $\text{CDCl}_3$ .
- S18. **Figure S15.** HMBC spectrum of simplexolide B (**2**) in  $\text{CDCl}_3$ .
- S19. **Figure S16.** NOESY spectrum of simplexolide B (**2**) in  $\text{CDCl}_3$ .
- S20. **Figure S17.** High resolution ESI mass spectrum of simplexolide C (**3**).
- S21. **Figure S18.** IR spectrum of simplexolide C (**3**).
- S22. **Figure S19.**  $^1\text{H}$  NMR spectrum of simplexolide C (**3**) in  $\text{CDCl}_3$ .
- S23. **Figure S20.**  $^{13}\text{C}$  NMR spectrum of simplexolide C (**3**) in  $\text{CDCl}_3$ .
- S24. **Figure S21.**  $^1\text{H}$ - $^1\text{H}$  COSY spectrum of simplexolide C (**3**)  $\text{CDCl}_3$ .
- S25. **Figure S22.** HSQC spectrum of simplexolide C (**3**) in  $\text{CDCl}_3$ .
- S26. **Figure S23.** HMBC spectrum of simplexolide C (**3**) in  $\text{CDCl}_3$ .
- S27. **Figure S24.** NOESY spectrum of simplexolide C (**3**) in  $\text{CDCl}_3$ .
- S28. **Figure S25.** High resolution ESI mass spectrum of simplexolide D (**4**).
- S29. **Figure S26.** IR spectrum of simplexolide D (**4**).
- S30. **Figure S27.**  $^1\text{H}$  NMR spectrum of simplexolide D (**4**) in  $\text{CDCl}_3$ .
- S31. **Figure S28.**  $^{13}\text{C}$  NMR spectrum of simplexolide D (**4**) in  $\text{CDCl}_3$ .

- S32. **Figure S29.**  $^1\text{H}$ - $^1\text{H}$  COSY spectrum of simplexolide D (**4**)  $\text{CDCl}_3$ .
- S33. **Figure S30.** HSQC spectrum of simplexolide D (**4**) in  $\text{CDCl}_3$ .
- S34. **Figure S31.** HMBC spectrum of simplexolide D (**4**) in  $\text{CDCl}_3$ .
- S35. **Figure S32.** NOESY spectrum of simplexolide D (**4**) in  $\text{CDCl}_3$ .
- S36. **Figure S33.** High resolution ESI mass spectrum of simplexolide E (**5**).
- S37. **Figure S34.** IR spectrum of simplexolide E (**5**).
- S38. **Figure S35.**  $^1\text{H}$  NMR spectrum of simplexolide E (**5**) in  $\text{CDCl}_3$ .
- S39. **Figure S36.**  $^{13}\text{C}$  NMR spectrum of simplexolide E (**5**) in  $\text{CDCl}_3$ .
- S40. **Figure S37.**  $^1\text{H}$ - $^1\text{H}$  COSY spectrum of simplexolide E (**5**)  $\text{CDCl}_3$ .
- S41. **Figure S38.** HSQC spectrum of simplexolide E (**5**) in  $\text{CDCl}_3$ .
- S42. **Figure S39.** HMBC spectrum of simplexolide E (**5**) in  $\text{CDCl}_3$ .
- S43. **Figure S40.** NOESY spectrum of simplexolide E (**5**) in  $\text{CDCl}_3$ .
- S44. **Figure S41.** High resolution ESI mass spectrum of plakorfuran A (**6**).
- S45. **Figure S42.** IR spectrum of plakorfuran A (**6**).
- S46. **Figure S43.**  $^1\text{H}$  NMR spectrum of plakorfuran A (**6**) in  $\text{CDCl}_3$ .
- S47. **Figure S44.**  $^{13}\text{C}$  NMR spectrum of plakorfuran A (**6**) in  $\text{CDCl}_3$ .
- S48. **Figure S45.**  $^1\text{H}$ - $^1\text{H}$  COSY spectrum of plakorfuran A (**6**)  $\text{CDCl}_3$ .
- S49. **Figure S46.** HSQC spectrum of plakorfuran A (**6**) in  $\text{CDCl}_3$ .
- S50. **Figure S47.** HMBC spectrum of plakorfuran A (**6**) in  $\text{CDCl}_3$ .
- S51. **Figure S48.** NOESY spectrum of plakorfuran A (**6**) in  $\text{CDCl}_3$ .

**Figure S1.** High resolution ESI mass spectrum of simplexolide A (1).

**Elemental Composition Report**

Tolerance = 10.0 PPM / DBE: min = -1.5, max = 50.0  
 Selected filters: None

Monoisotopic Mass, Even Electron Ions  
 17 formula(e) evaluated with 1 results within limits (up to 50 closest results for each mass)  
 Elements Used:  
 C: 5-30 H: 5-50 O: 1-5 Na: 1-1

SIPI  
 XF-16 M.W=282  
 WQ10190H 48 (1.658) AM (Cen,6, 80.00, Ar,5000.0,325.16,0.70); Sm (SG, 2x3.00); Cm (36:50)

21-May-2010,14:24:18  
 0.00000000  
 TOF MS ES+  
 1.04e5

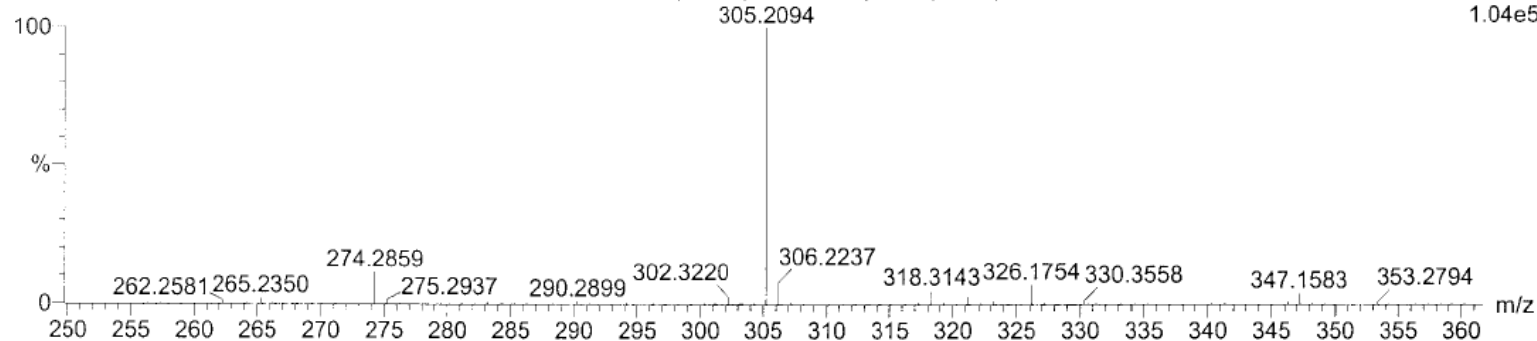

Minimum: 35.00 -1.5  
 Maximum: 100.00 5.0 10.0 50.0

| Mass     | RA     | Calc. Mass | mDa | PPM | DBE | i-FIT  | Formula       |
|----------|--------|------------|-----|-----|-----|--------|---------------|
| 305.2094 | 100.00 | 305.2093   | 0.1 | 0.3 | 2.5 | 7692.5 | C17 H30 O3 Na |

**Figure S2.** IR spectrum of simplexolide A (**1**).

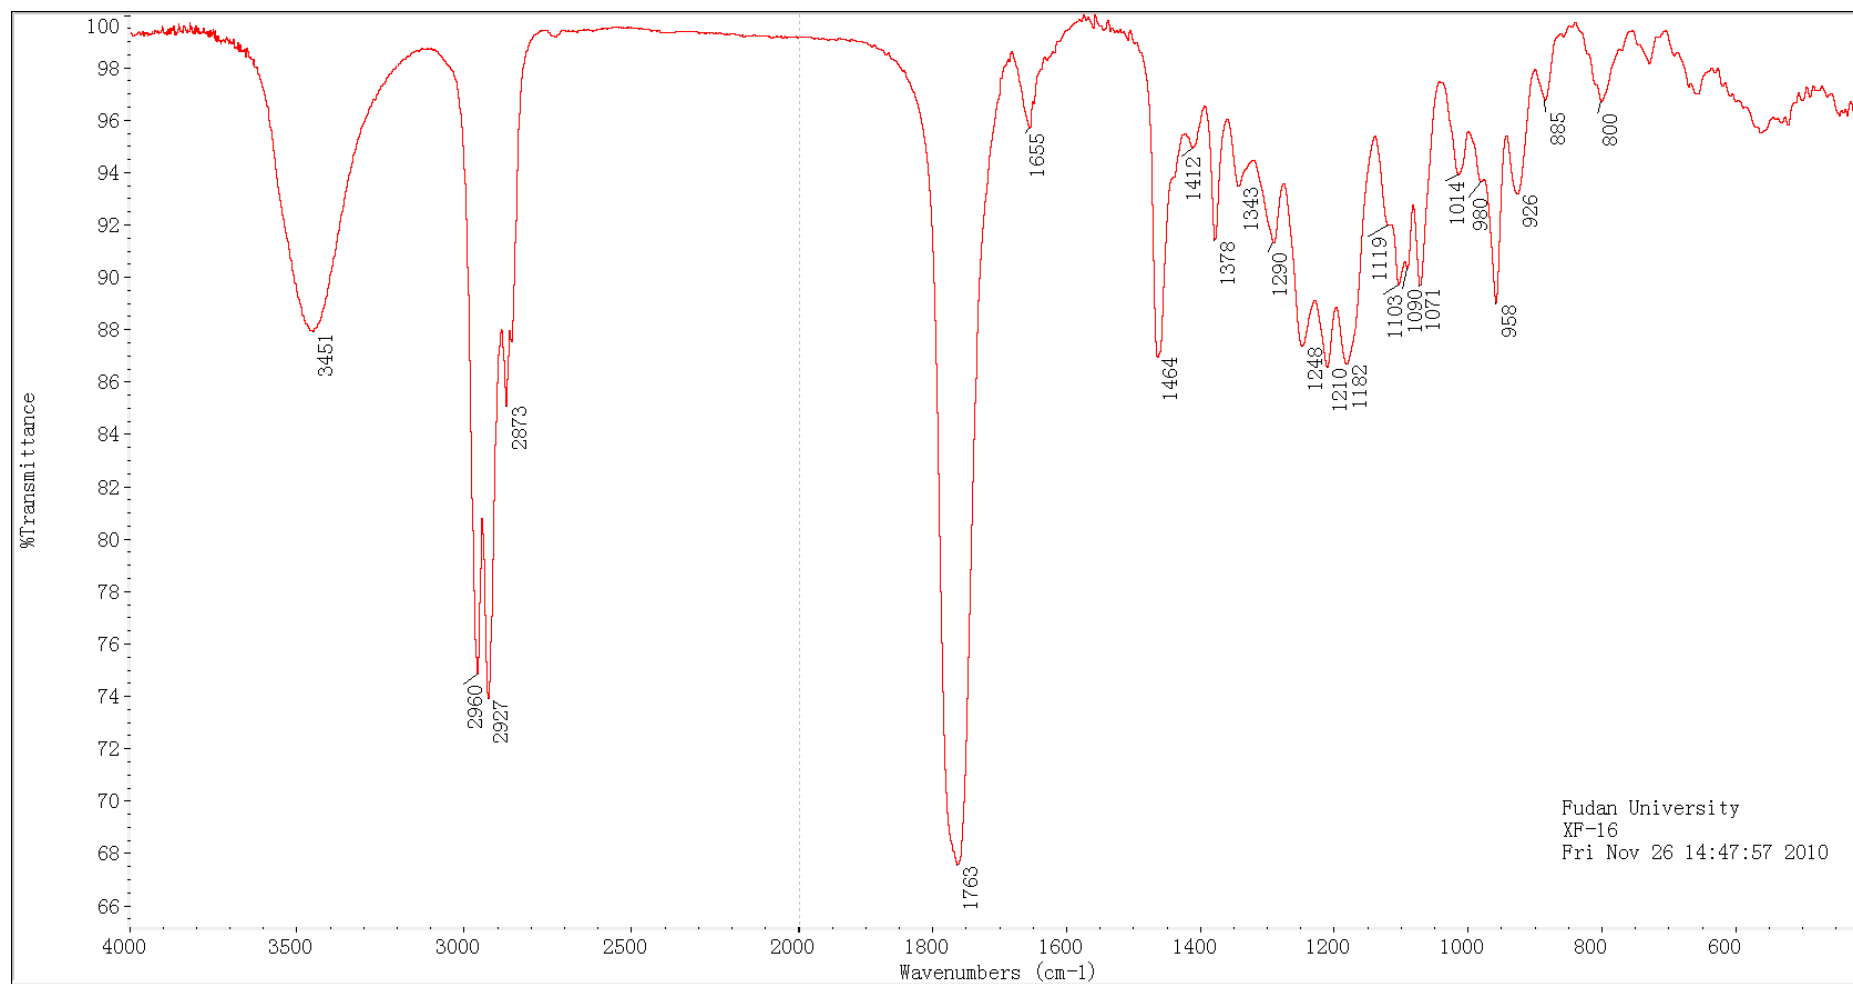

**Figure S3.**  $^1\text{H}$  NMR spectrum of simplexolide A (**1**) in  $\text{CDCl}_3$ .

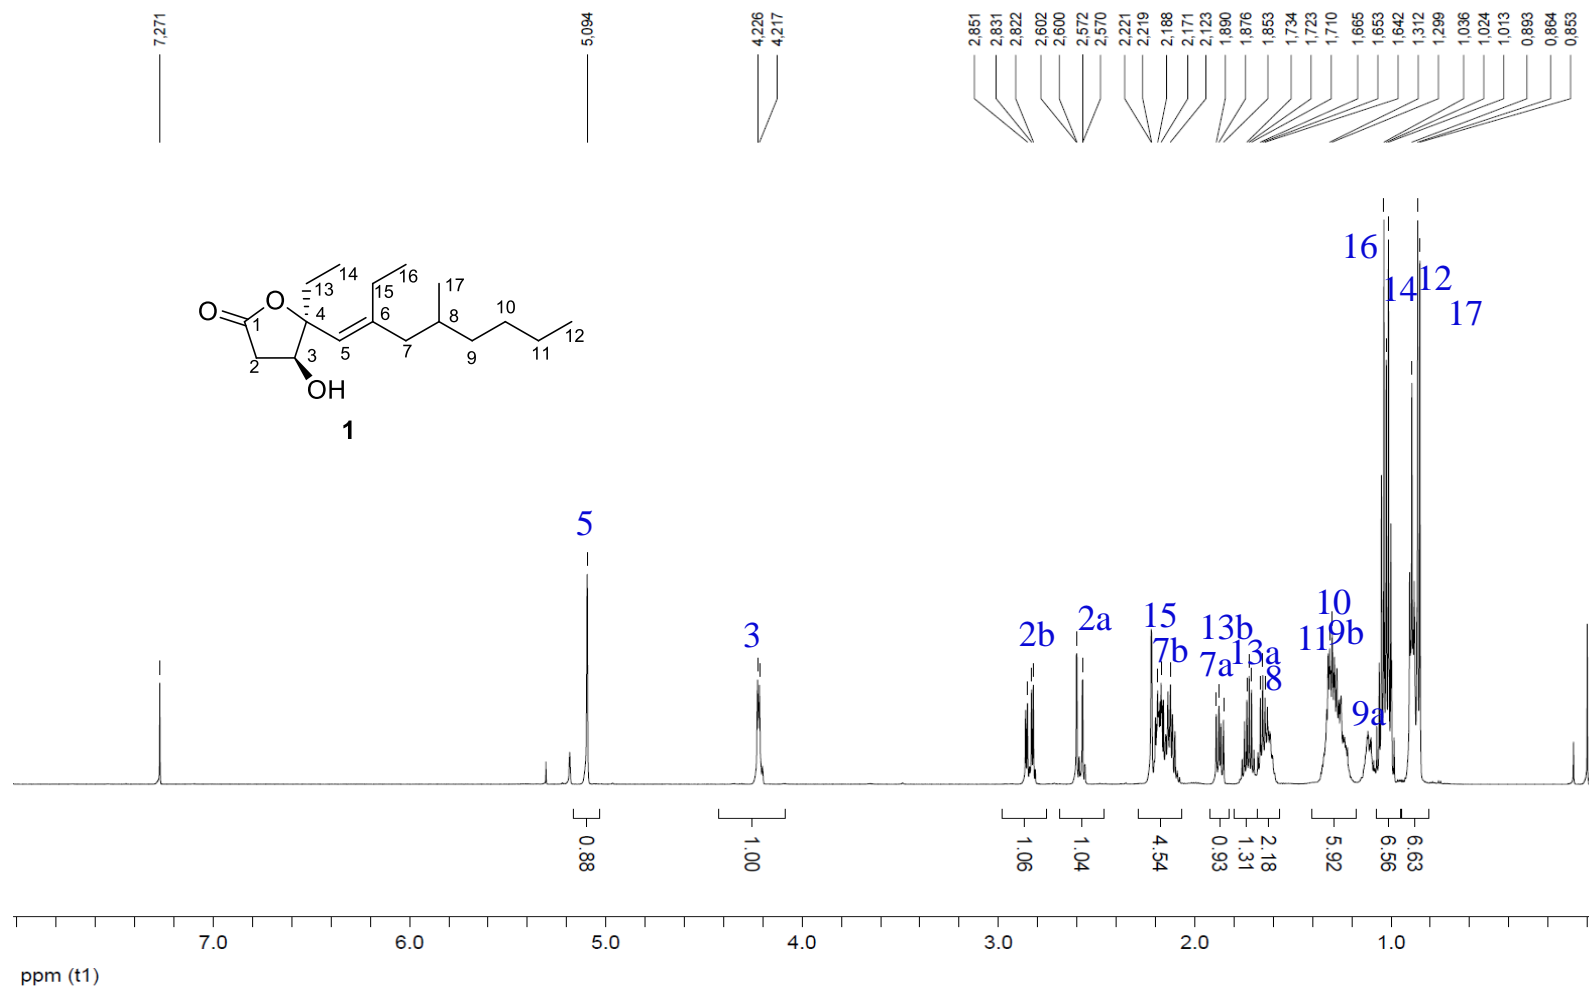

**Figure S4.**  $^{13}\text{C}$  NMR spectrum of simplexolide A (**1**) in  $\text{CDCl}_3$ .

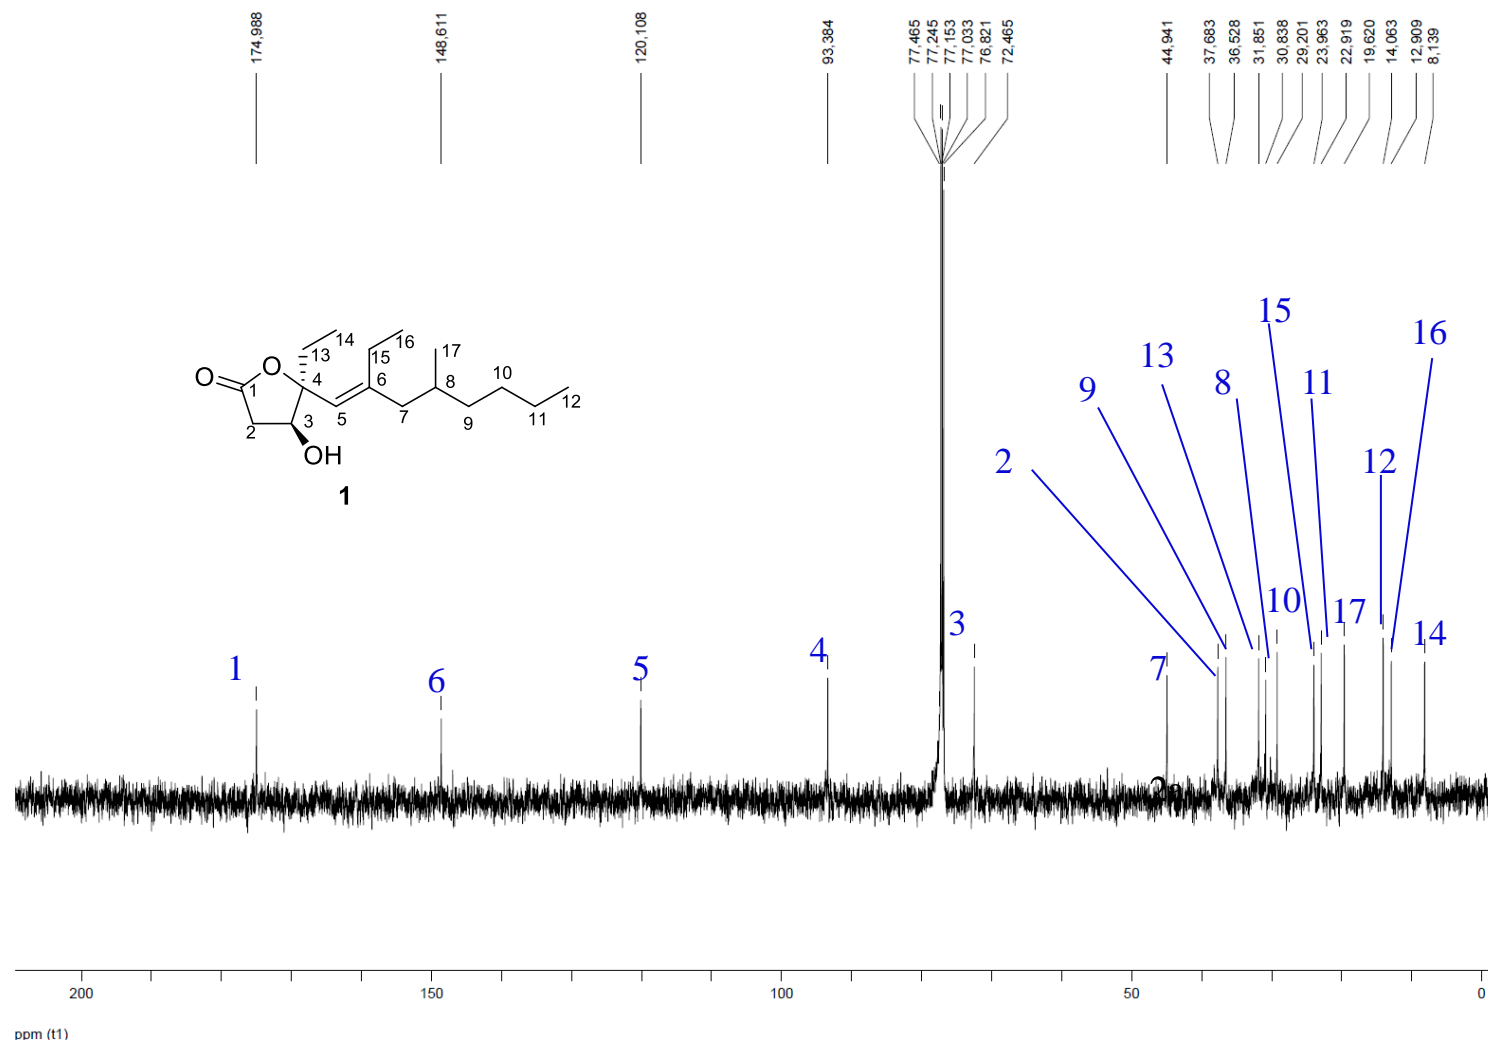

**Figure S5.**  $^1\text{H}$ - $^1\text{H}$  COSY spectrum of simplexolide A (**1**)  $\text{CDCl}_3$

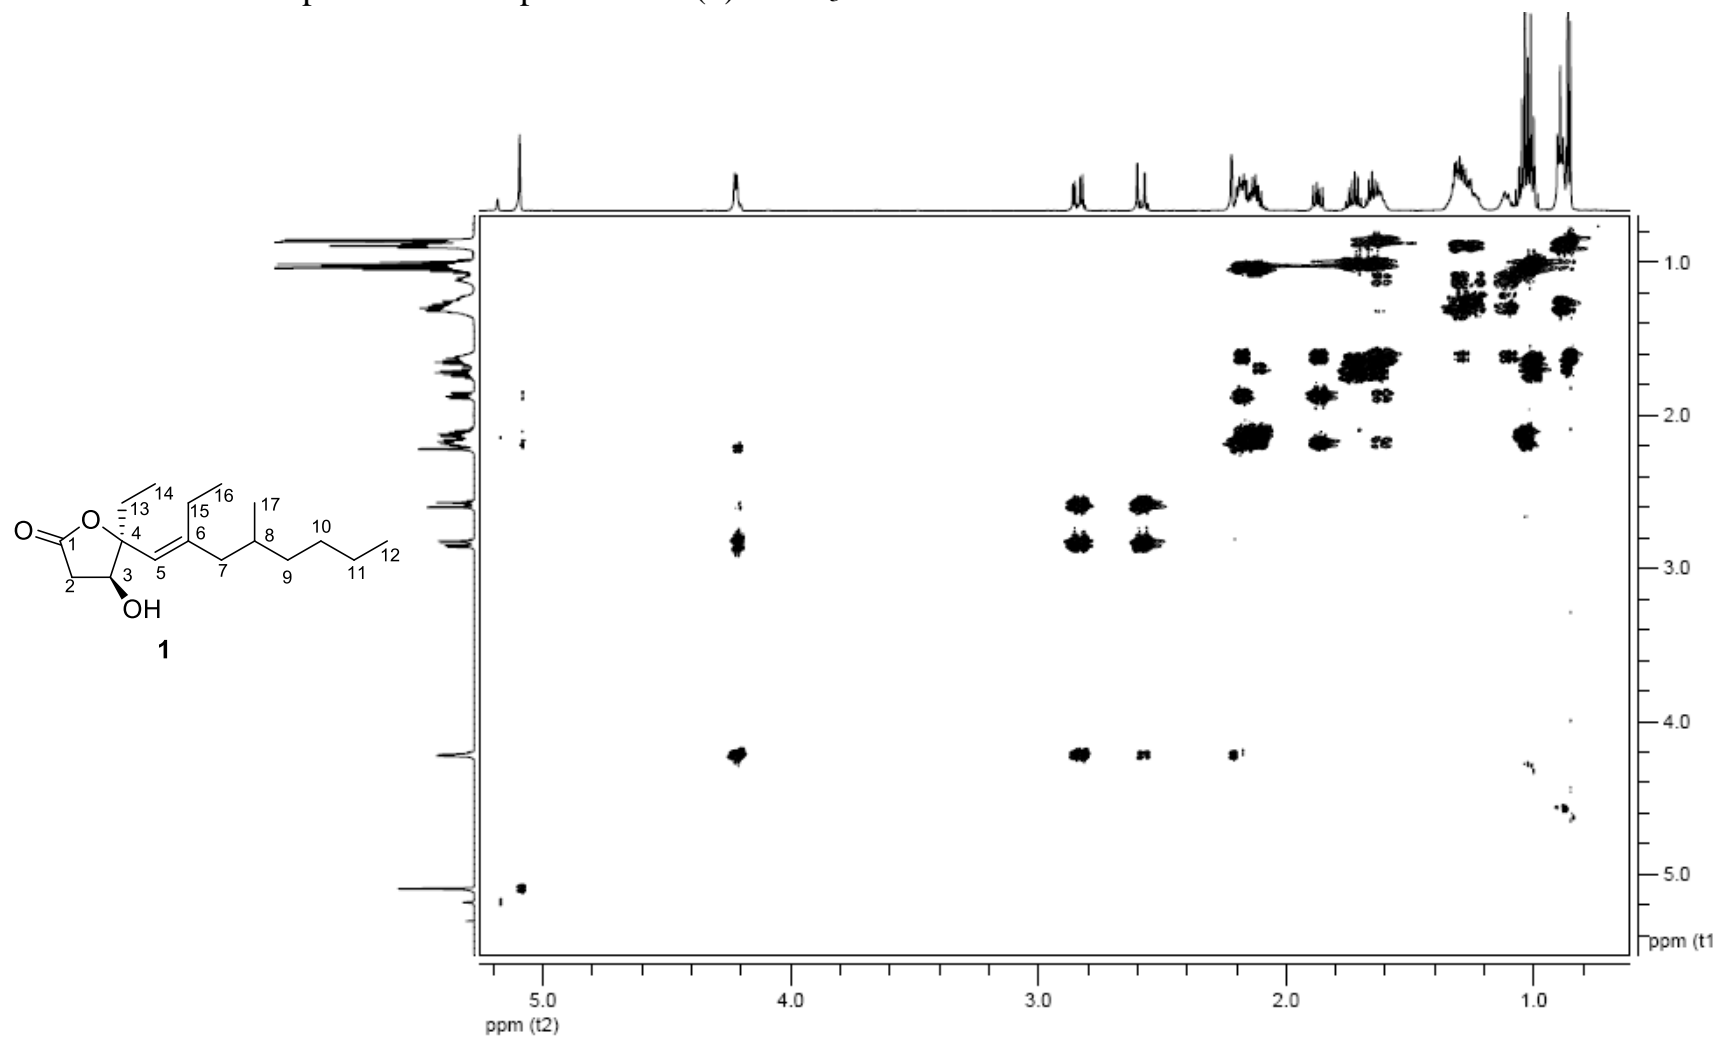



**Figure S6.** HSQC spectrum of simplexolide A (**1**) CDCl<sub>3</sub>

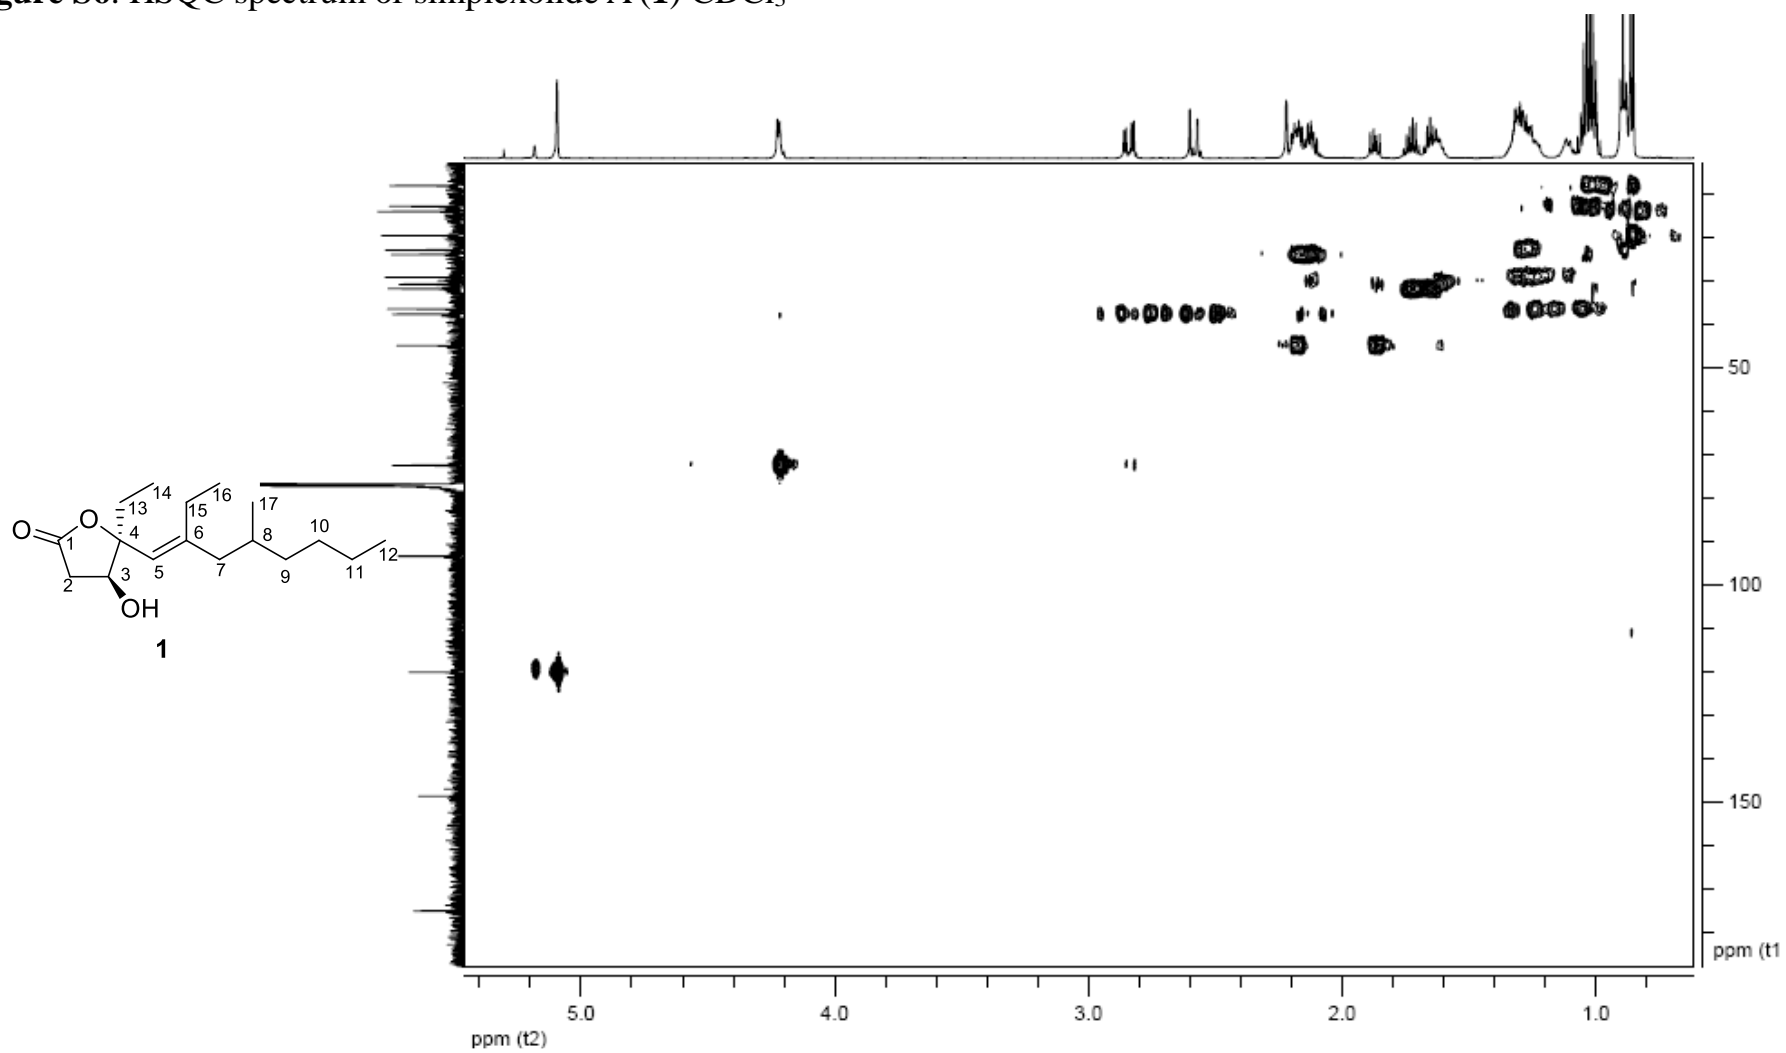

Figure S7. HMBC spectrum of simplexolide A (1) CDCl<sub>3</sub>

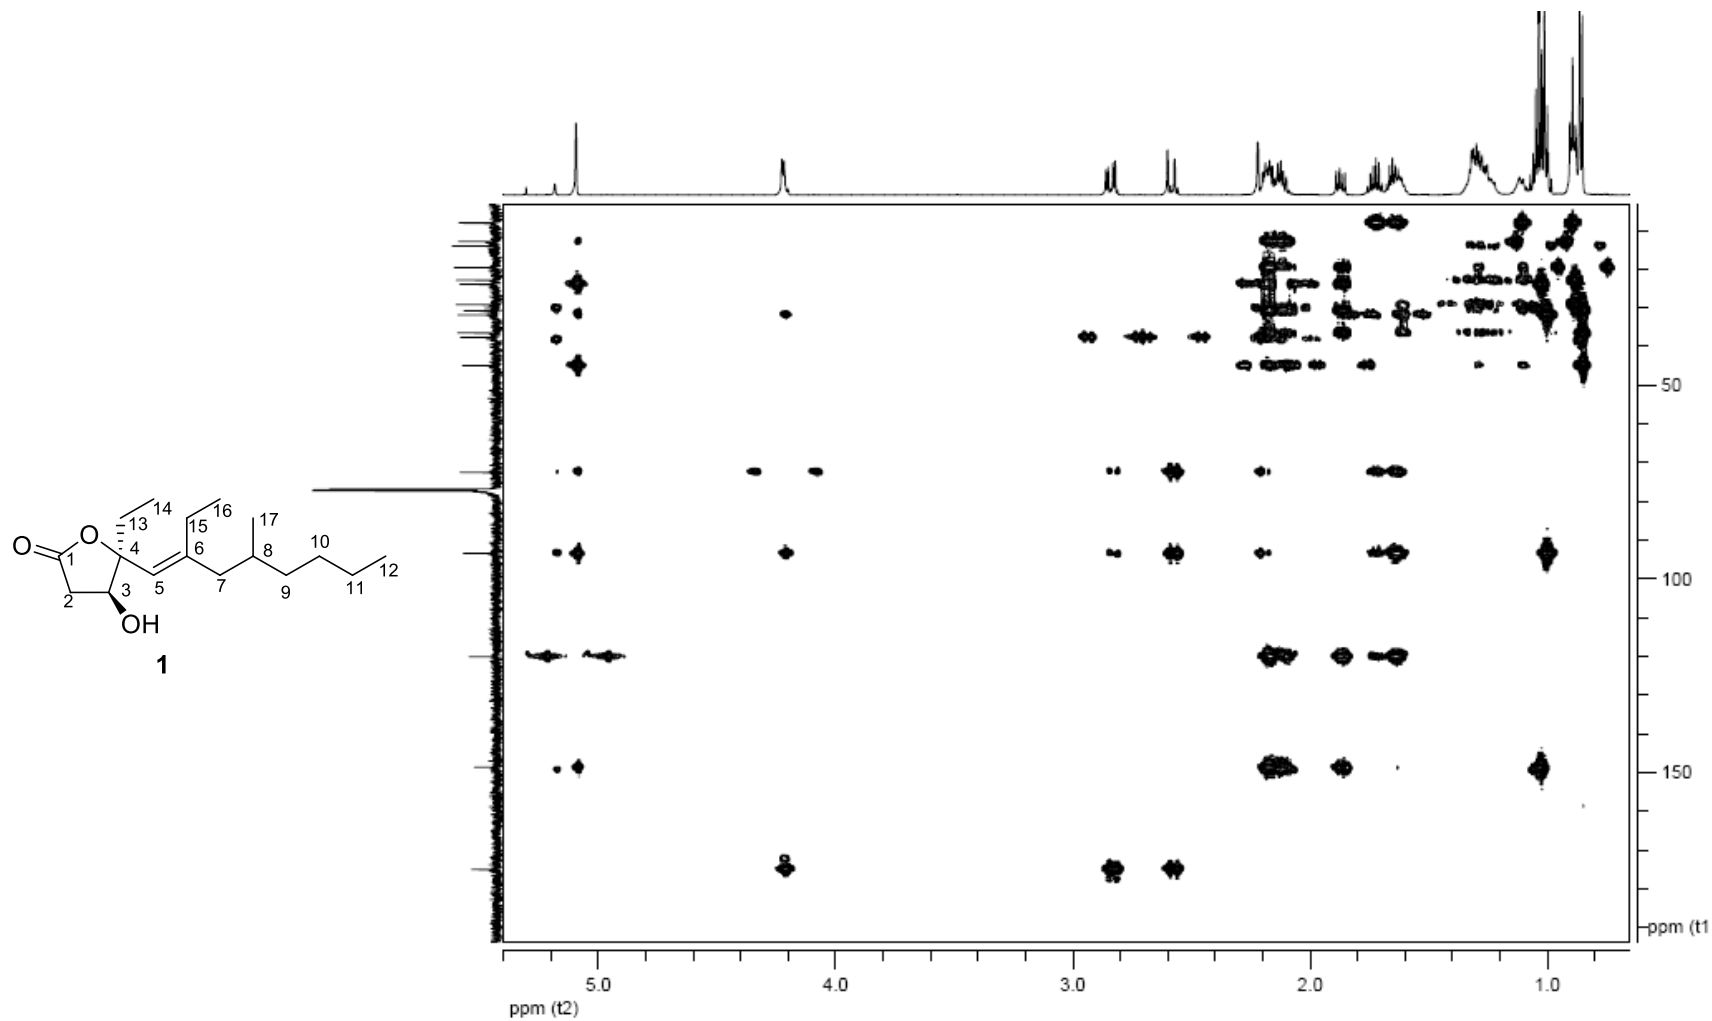

**Figure S8.** NOESY spectrum of simplexolide A (**1**) CDCl<sub>3</sub>

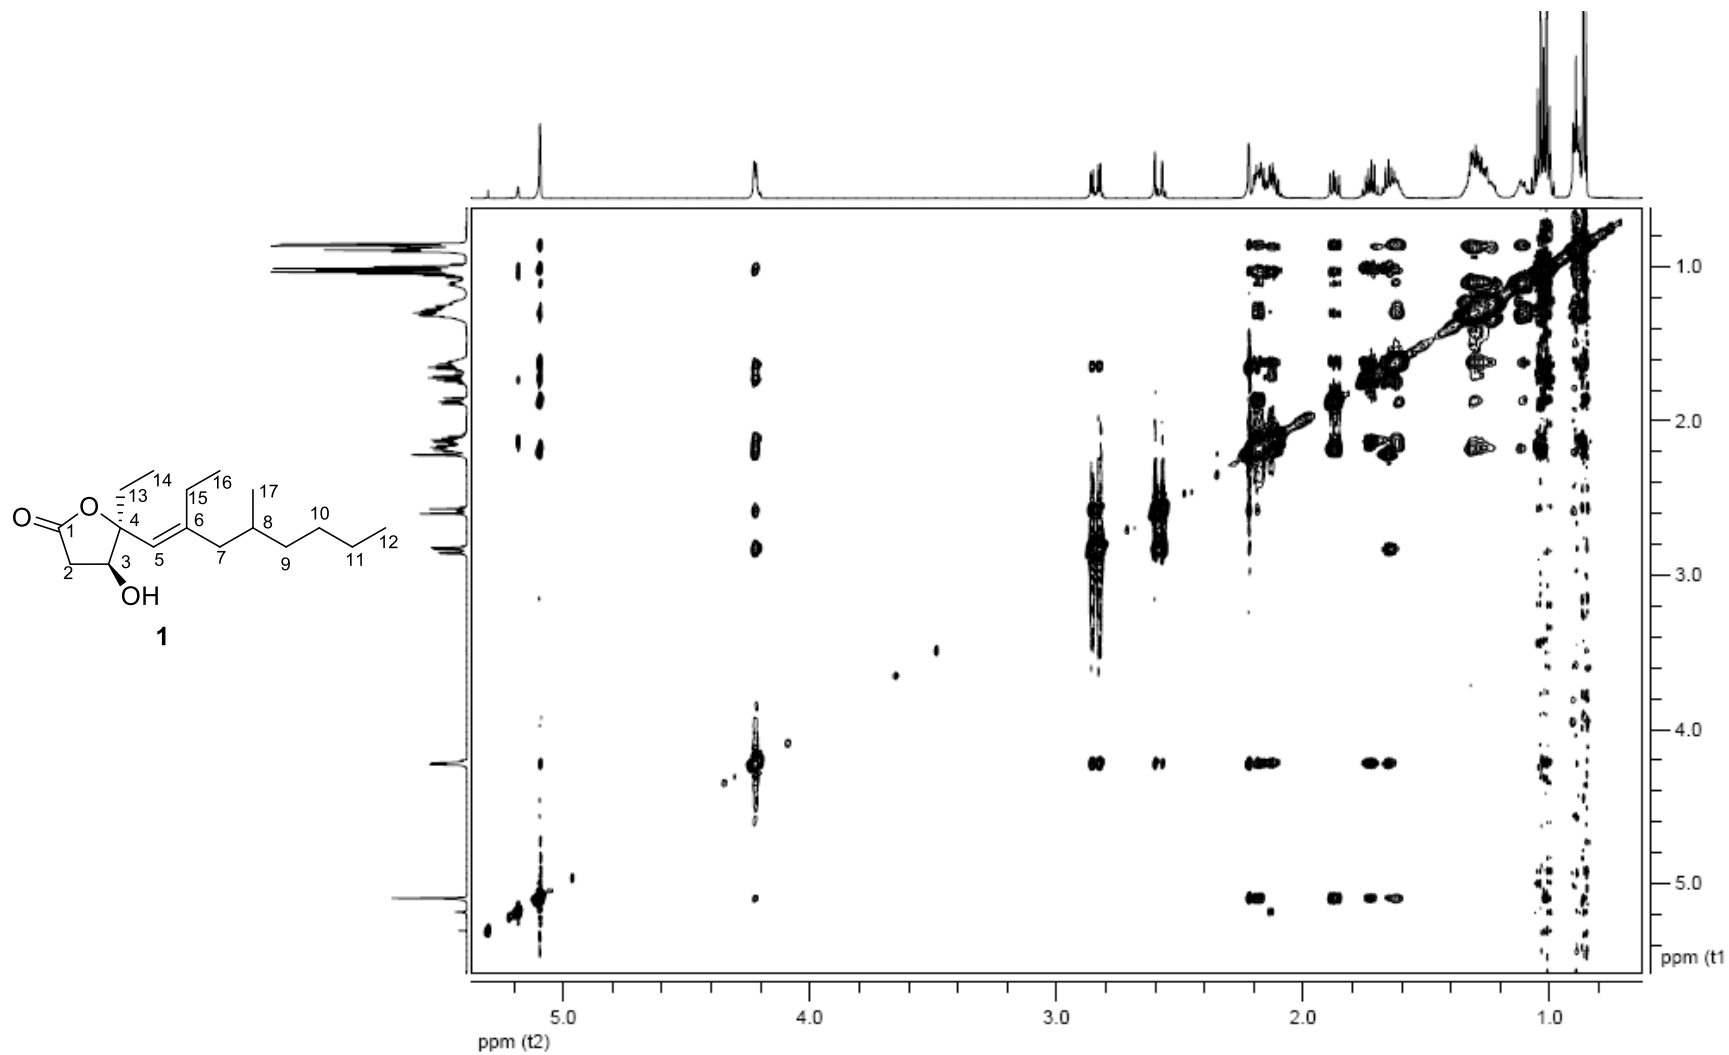

**Figure S9.** High resolution ESI mass spectrum of simplexolide B (2).

**Elemental Composition Report**

Tolerance = 10.0 PPM / DBE: min = -1.5, max = 50.0  
 Selected filters: None

Monoisotopic Mass, Even Electron Ions  
 17 formula(e) evaluated with 1 results within limits (up to 50 closest results for each mass)  
 Elements Used:  
 C: 5-30 H: 5-50 O: 1-5 Na: 1-1

SIP!  
 XF-22a M.W=282  
 WQ10196H 29 (1.002) AM (Cen,6, 80.00, Ar,5000.0,325.16,0.70); Sm (SG, 2x3.00); Cm (16:39)

24-May-2010,11:01:02  
 0.00000000  
 TOF MS ES+  
 3.36e5

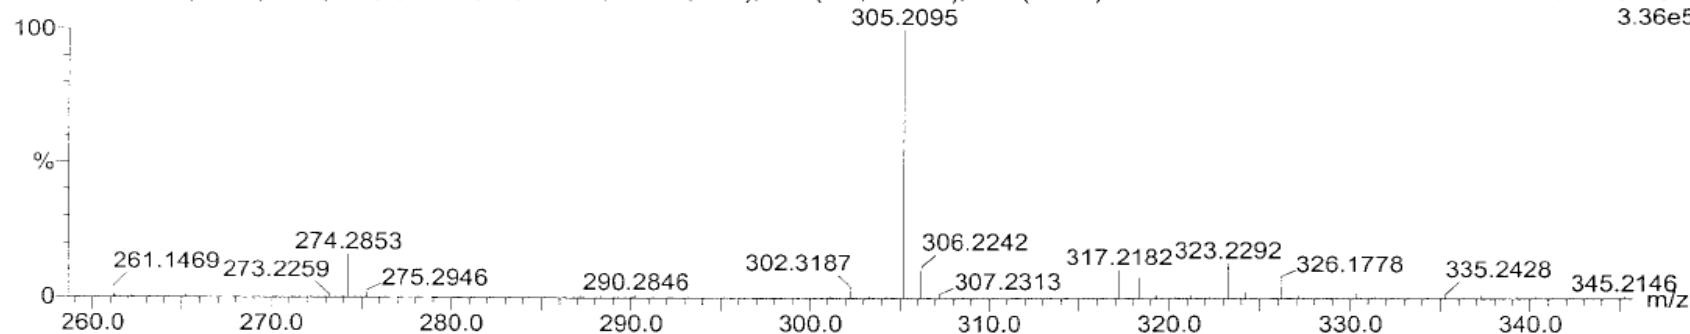

Minimum: 35.00  
 Maximum: 100.00

| Mass     | RA     | Calc. Mass | mDa | PPM | DBE | i-FIT  | Formula       |
|----------|--------|------------|-----|-----|-----|--------|---------------|
| 305.2095 | 100.00 | 305.2093   | 0.2 | 0.7 | 2.5 | 9415.2 | C17 H30 O3 Na |

**Figure S10.** IR spectrum of simplexolide B (2).

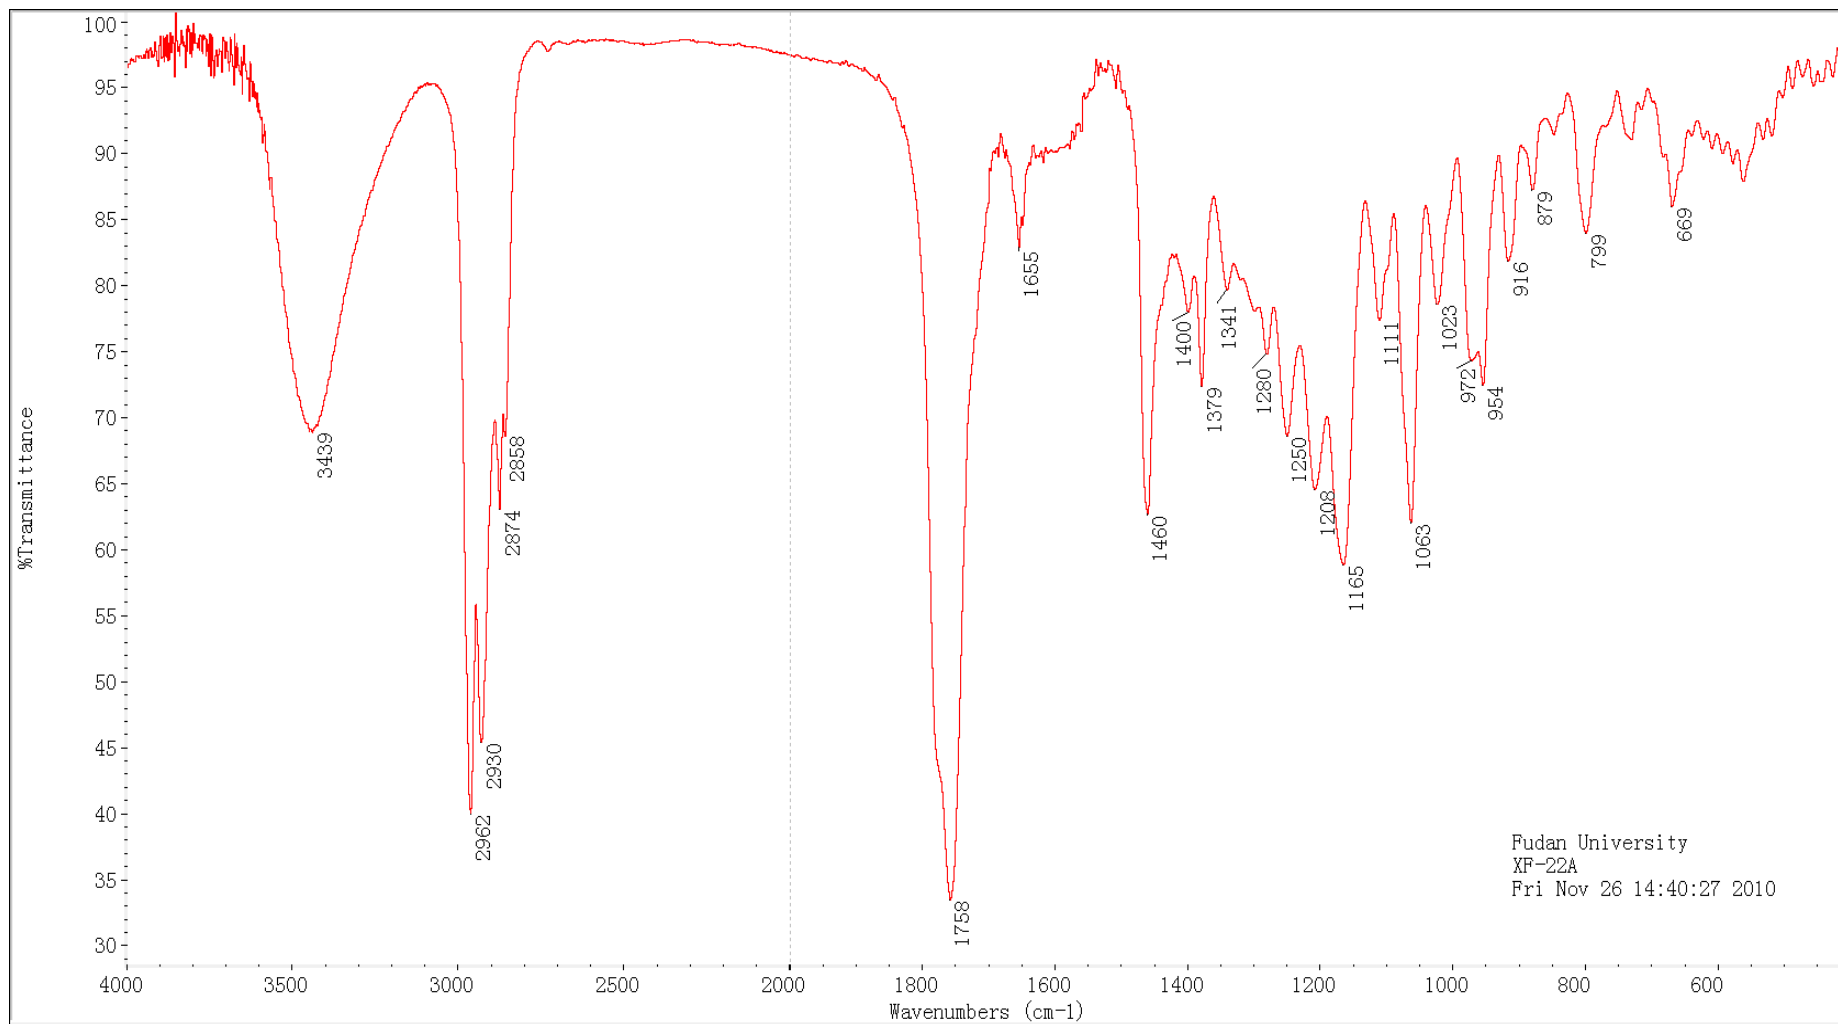

Figure S11.  $^1\text{H}$  NMR spectrum of simplexolide B (**2**) in  $\text{CDCl}_3$ .

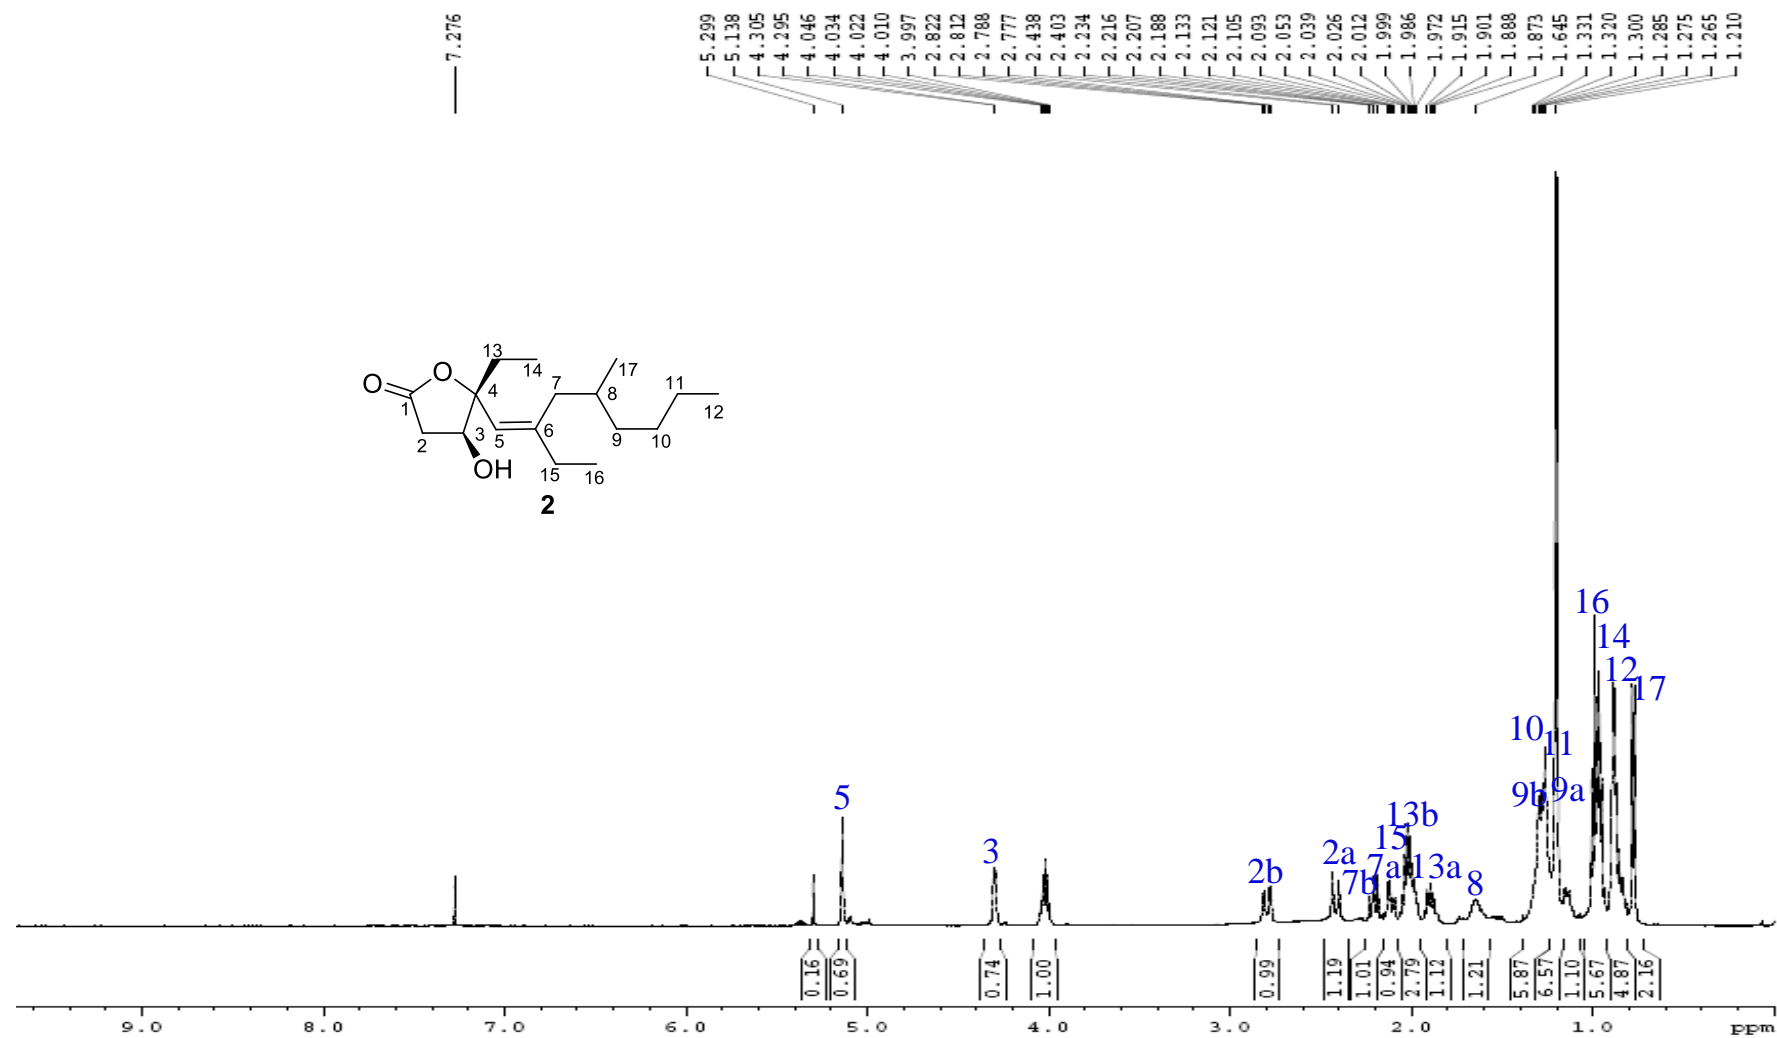

**Figure S12.**  $^{13}\text{C}$  NMR spectrum of simplexolide B (**2**) in  $\text{CDCl}_3$ .

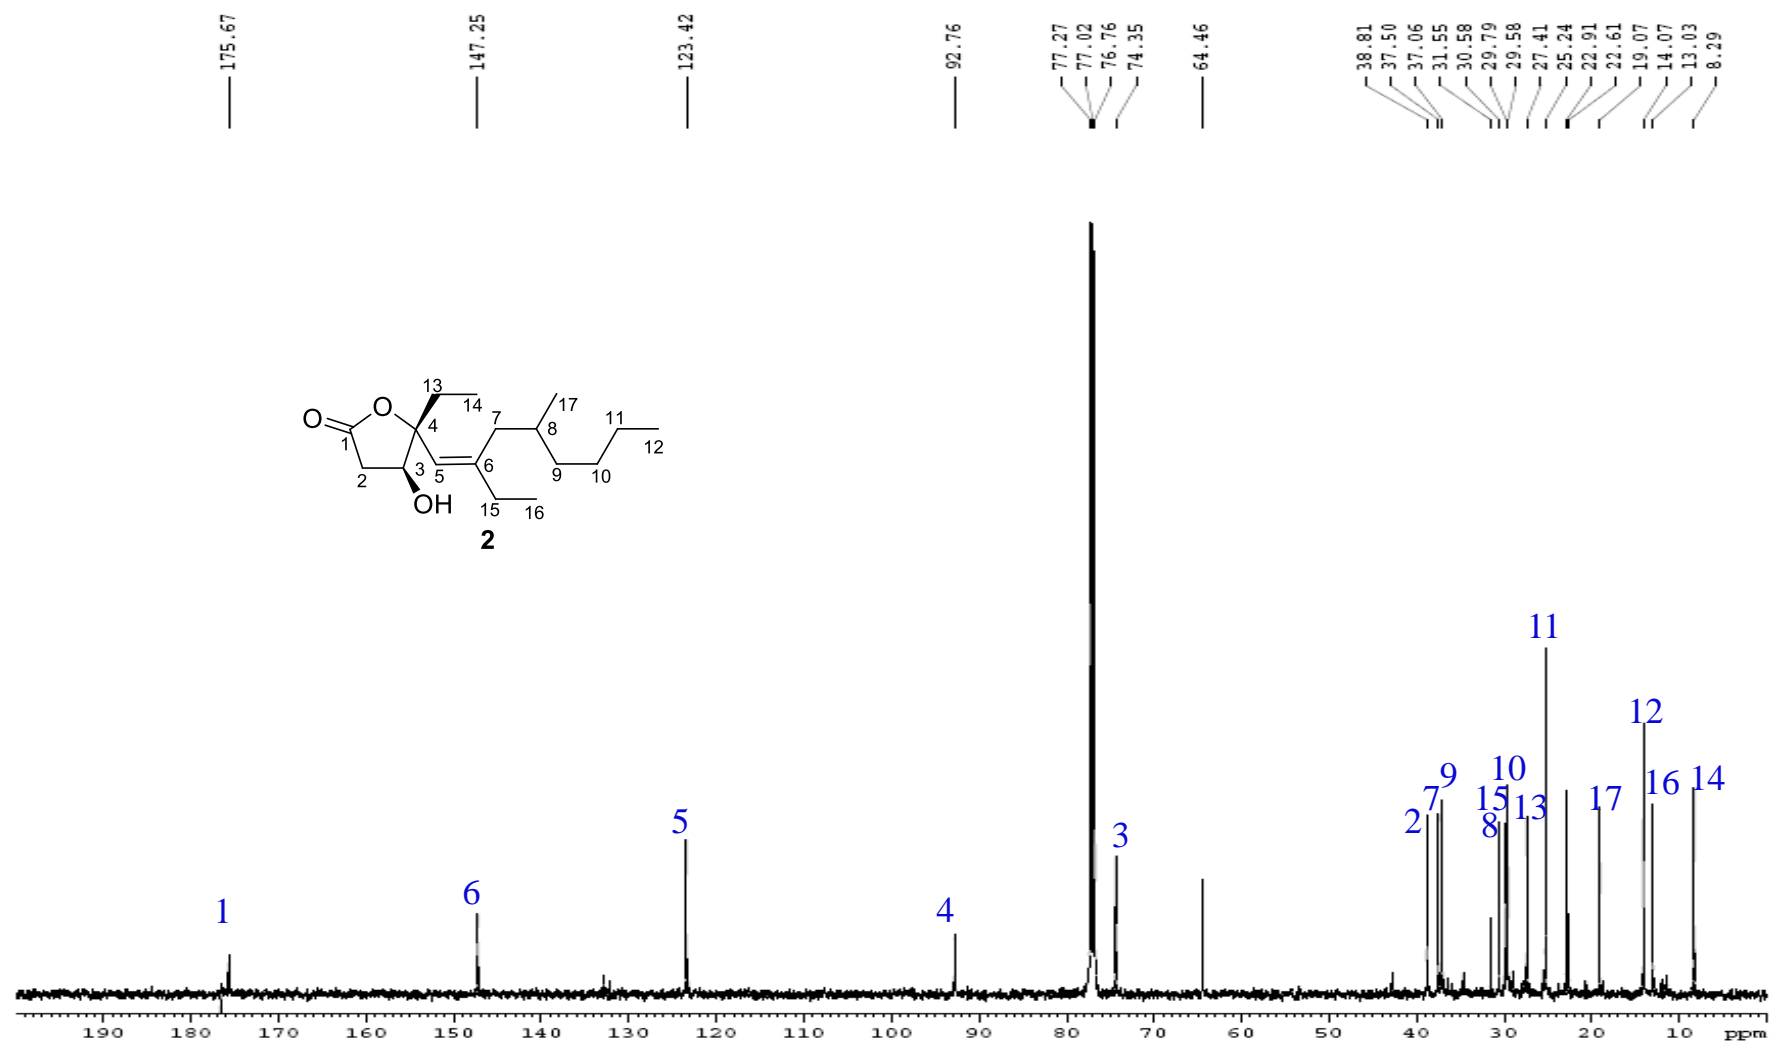

**Figure S13.**  $^1\text{H}$ - $^1\text{H}$  COSY spectrum of simplexolide B (**2**) in  $\text{CDCl}_3$

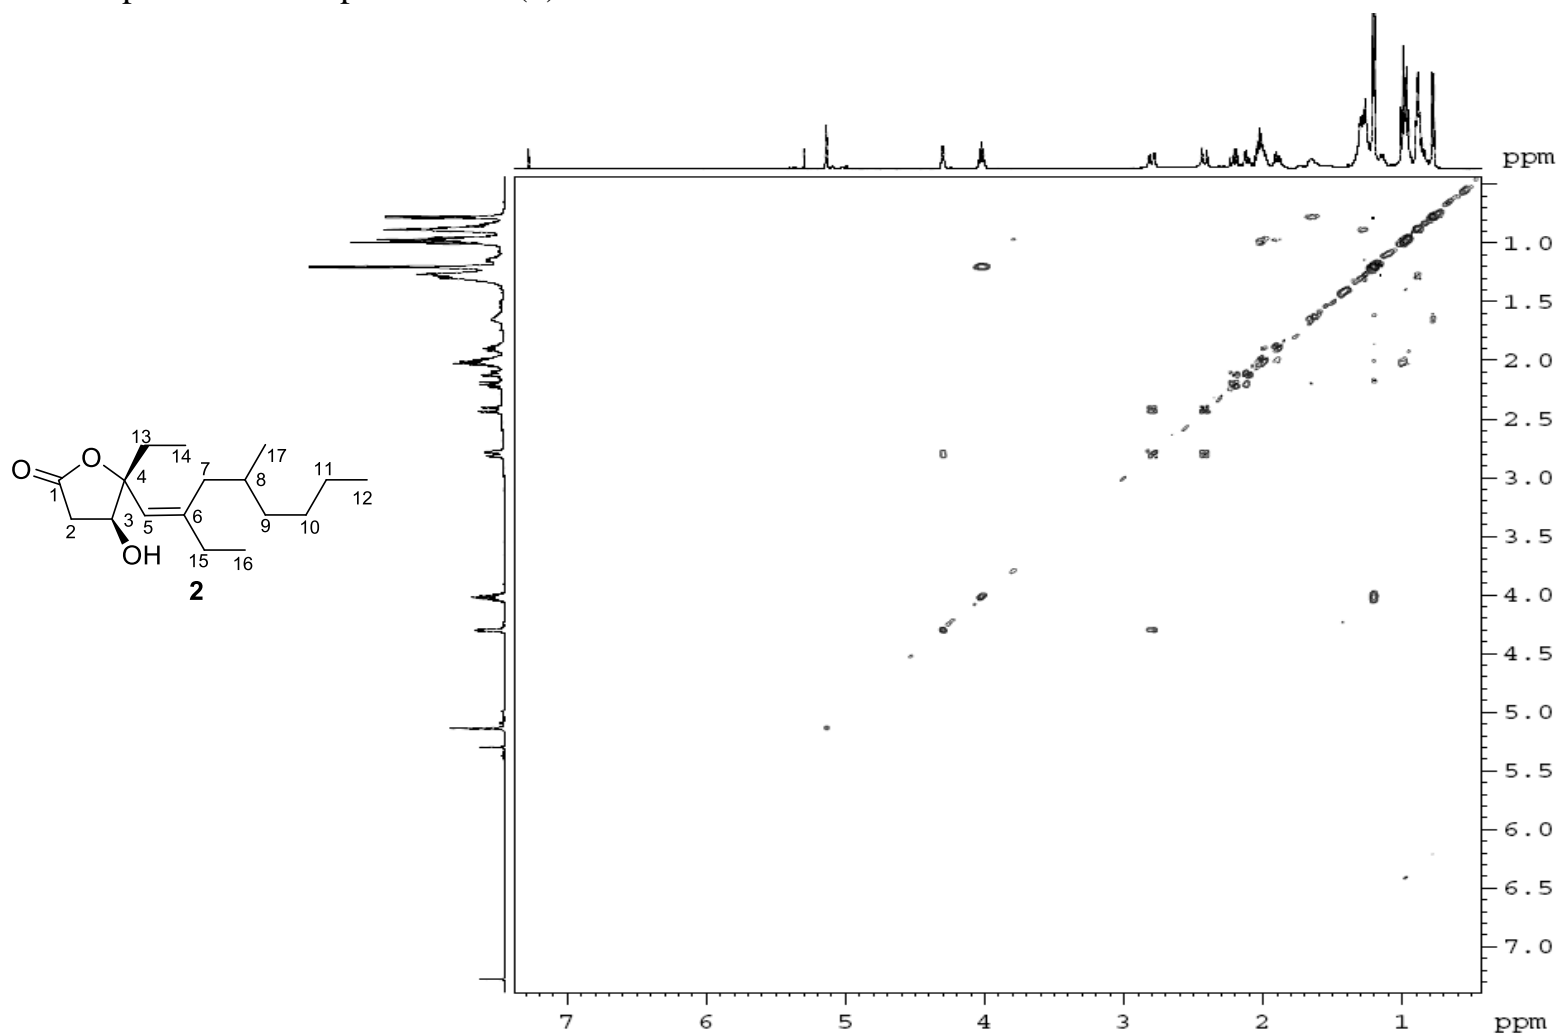





**Figure S15.** HMBC spectrum of simplexolide B (**2**) in CDCl<sub>3</sub>.

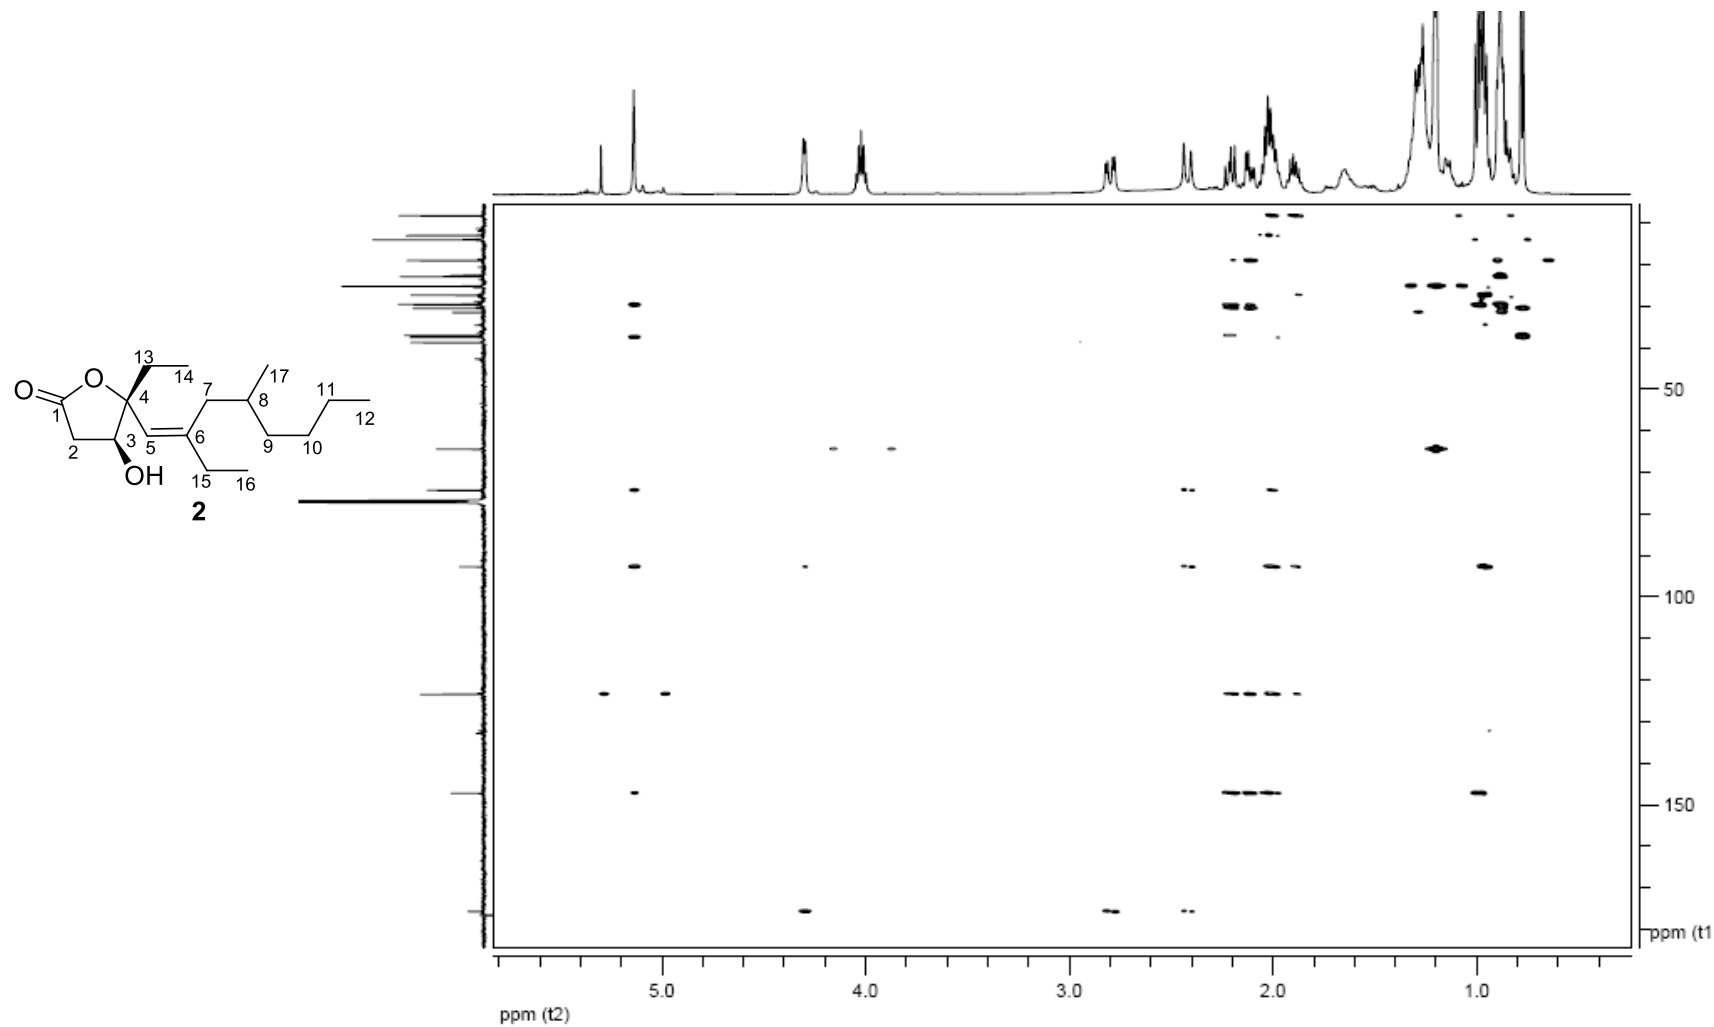

**Figure S16.** NOESY spectrum of simplexolide B (**2**) in CDCl<sub>3</sub>.

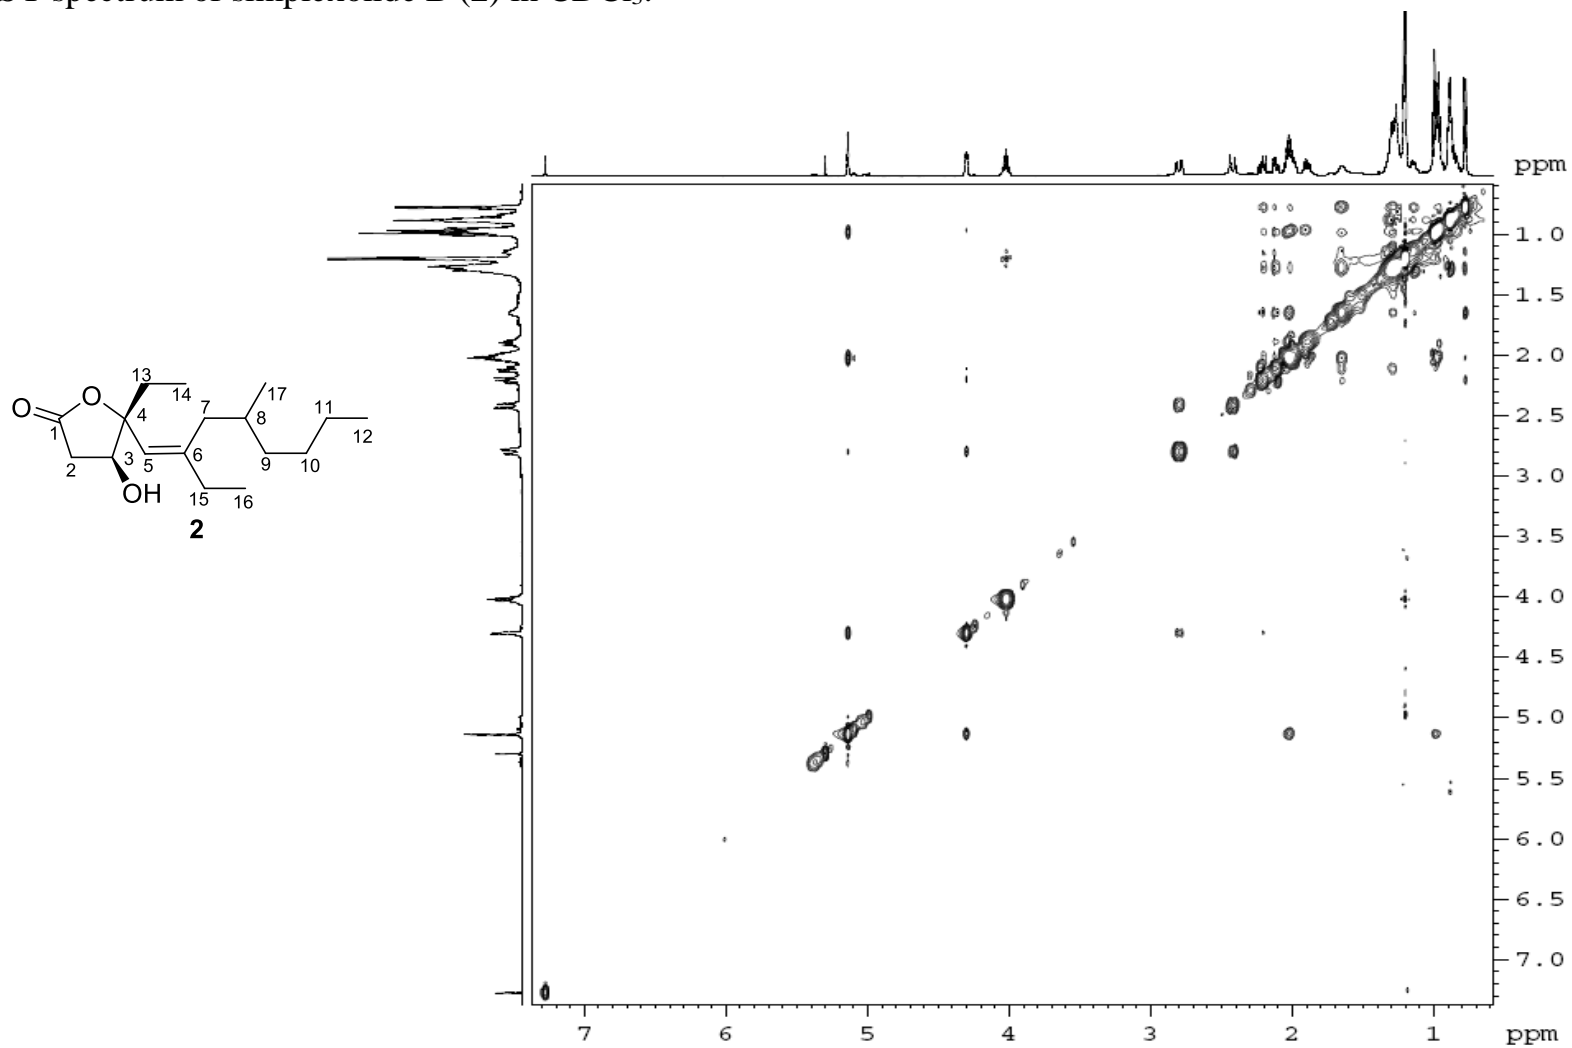

**Figure S17.** High resolution ESI mass spectrum of simplexolide C (**3**).

**Elemental Composition Report**

Tolerance = 10.0 PPM / DBE: min = -1.5, max = 50.0  
 Selected filters: None

Monoisotopic Mass, Even Electron Ions  
 17 formula(e) evaluated with 1 results within limits (up to 50 closest results for each mass)  
 Elements Used:  
 C: 5-30 H: 5-50 O: 1-5 Na: 1-1

SIPI  
 XF-23b M.W=296  
 WQ10194H1 9 (0.311) AM (Cen,6, 80.00, Ar,5000.0,325.16,0.70); Sm (SG, 2x3.00); Cm (1:15)

21-May-2010,15:33:54  
 0.00000000  
 TOF MS ES+  
 2.93e4

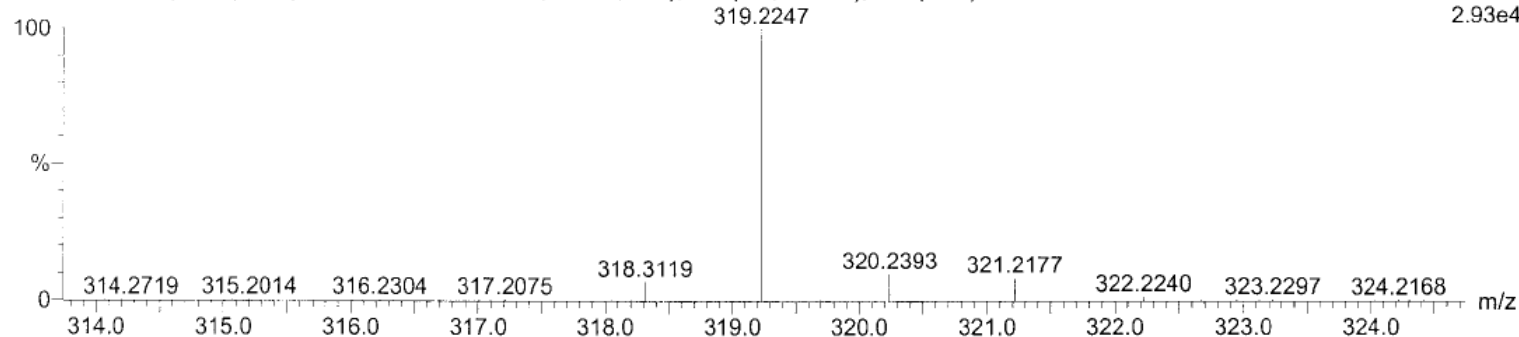

Minimum: 35.00 -1.5  
 Maximum: 100.00 5.0 10.0 50.0

| Mass     | RA     | Calc. Mass | mDa  | PPM  | DBE | i-FIT  | Formula       |
|----------|--------|------------|------|------|-----|--------|---------------|
| 319.2247 | 100.00 | 319.2249   | -0.2 | -0.6 | 2.5 | 1893.8 | C18 H32 O3 Na |

**Figure S18.** IR spectrum of simplexolide C (**3**).

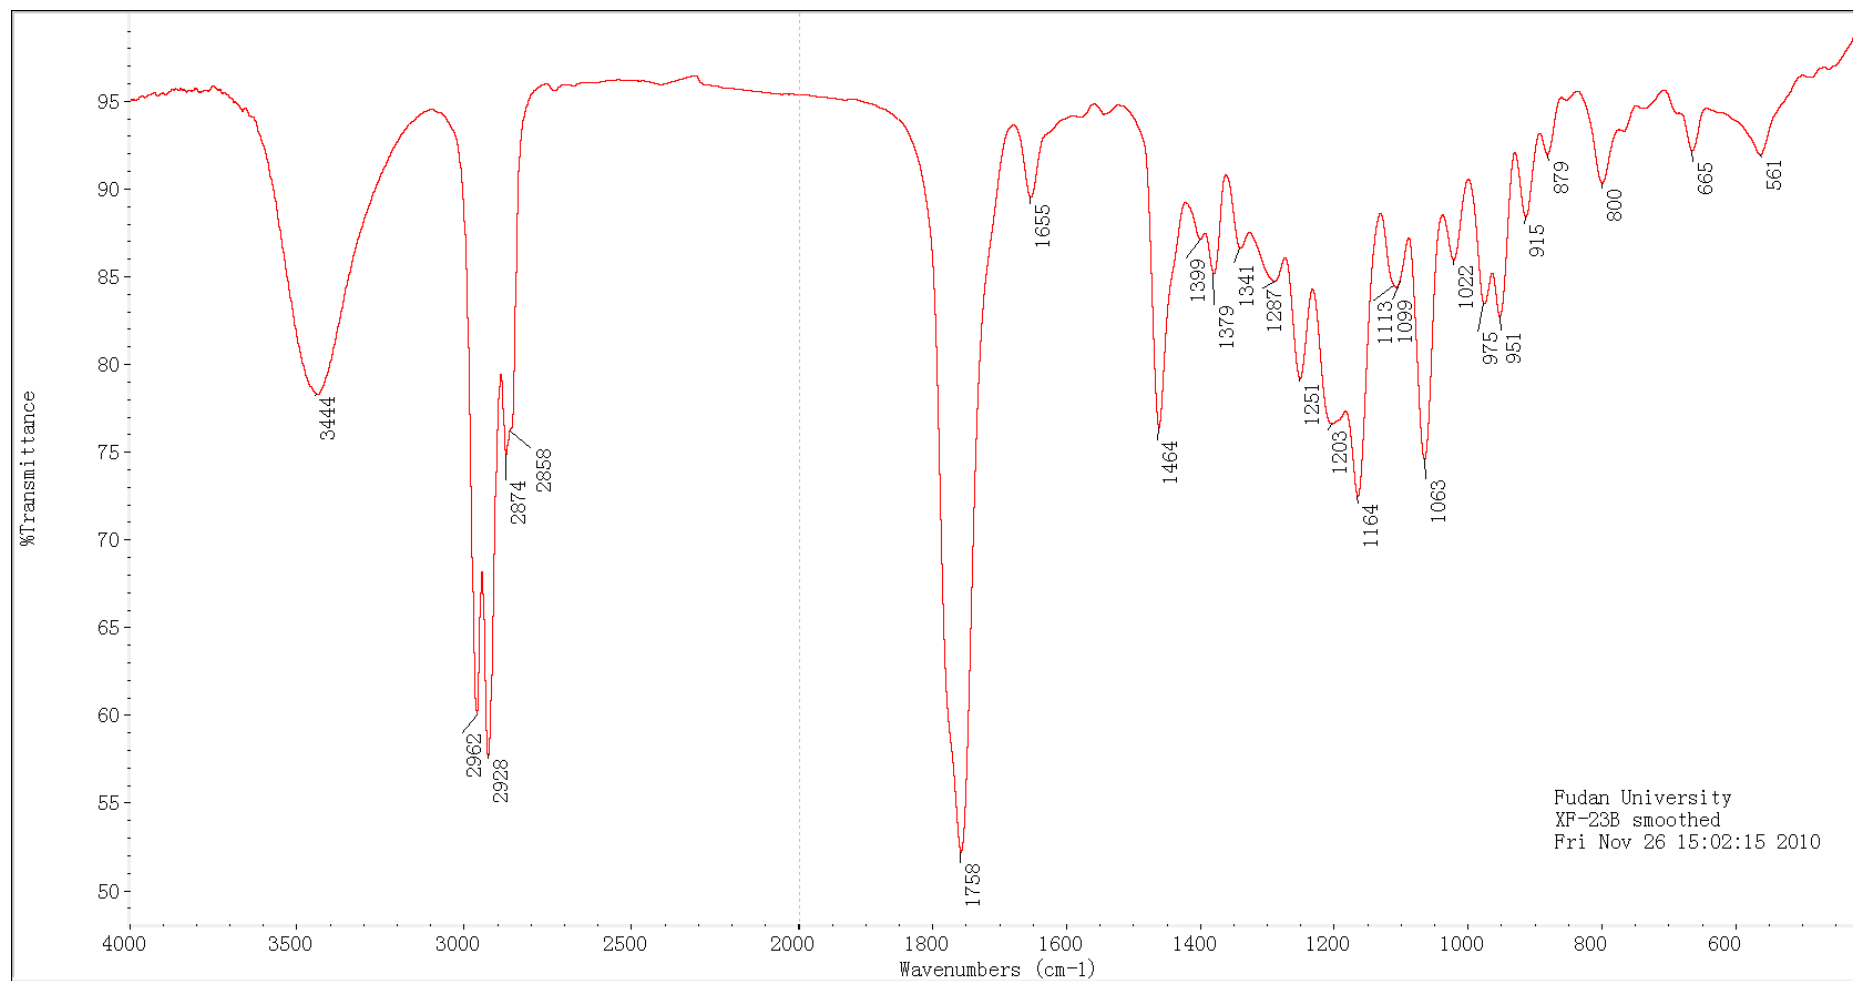

Figure S19.  $^1\text{H}$  NMR spectrum of simplexolide C (**3**) in  $\text{CDCl}_3$ .

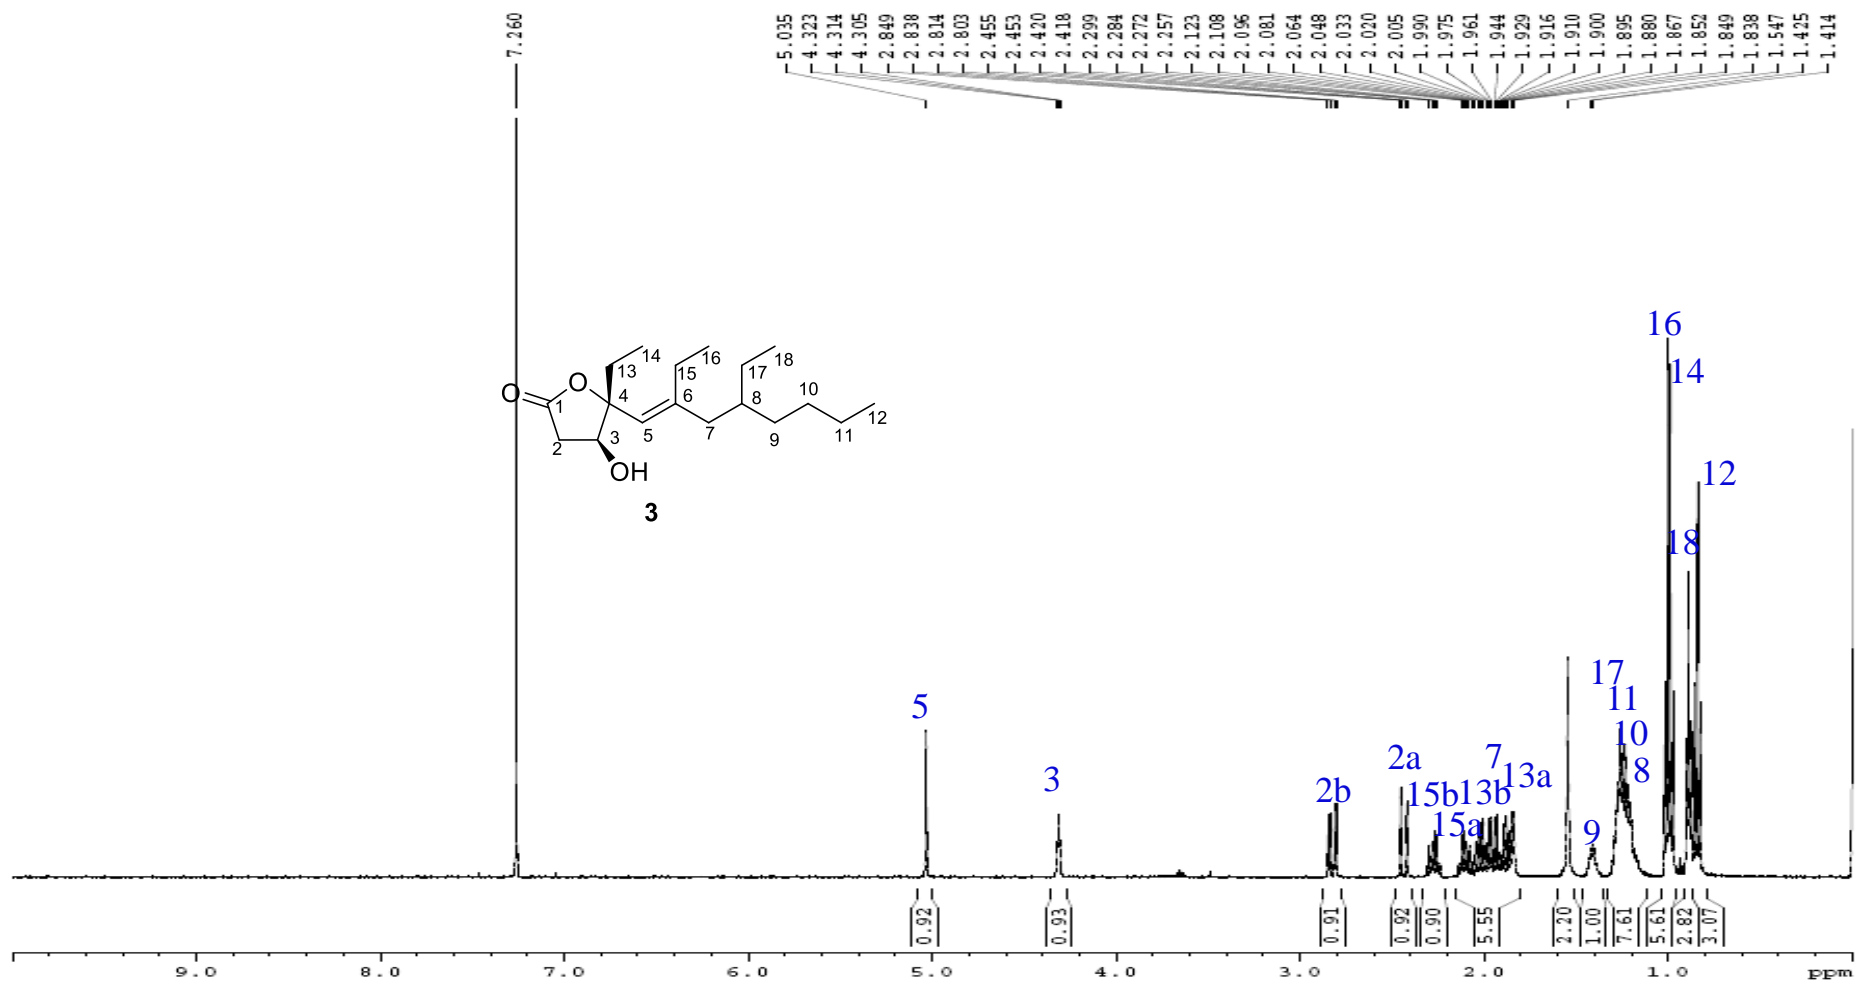

Figure S20.  $^{13}\text{C}$  NMR spectrum of simplexolide C (**3**) in  $\text{CDCl}_3$

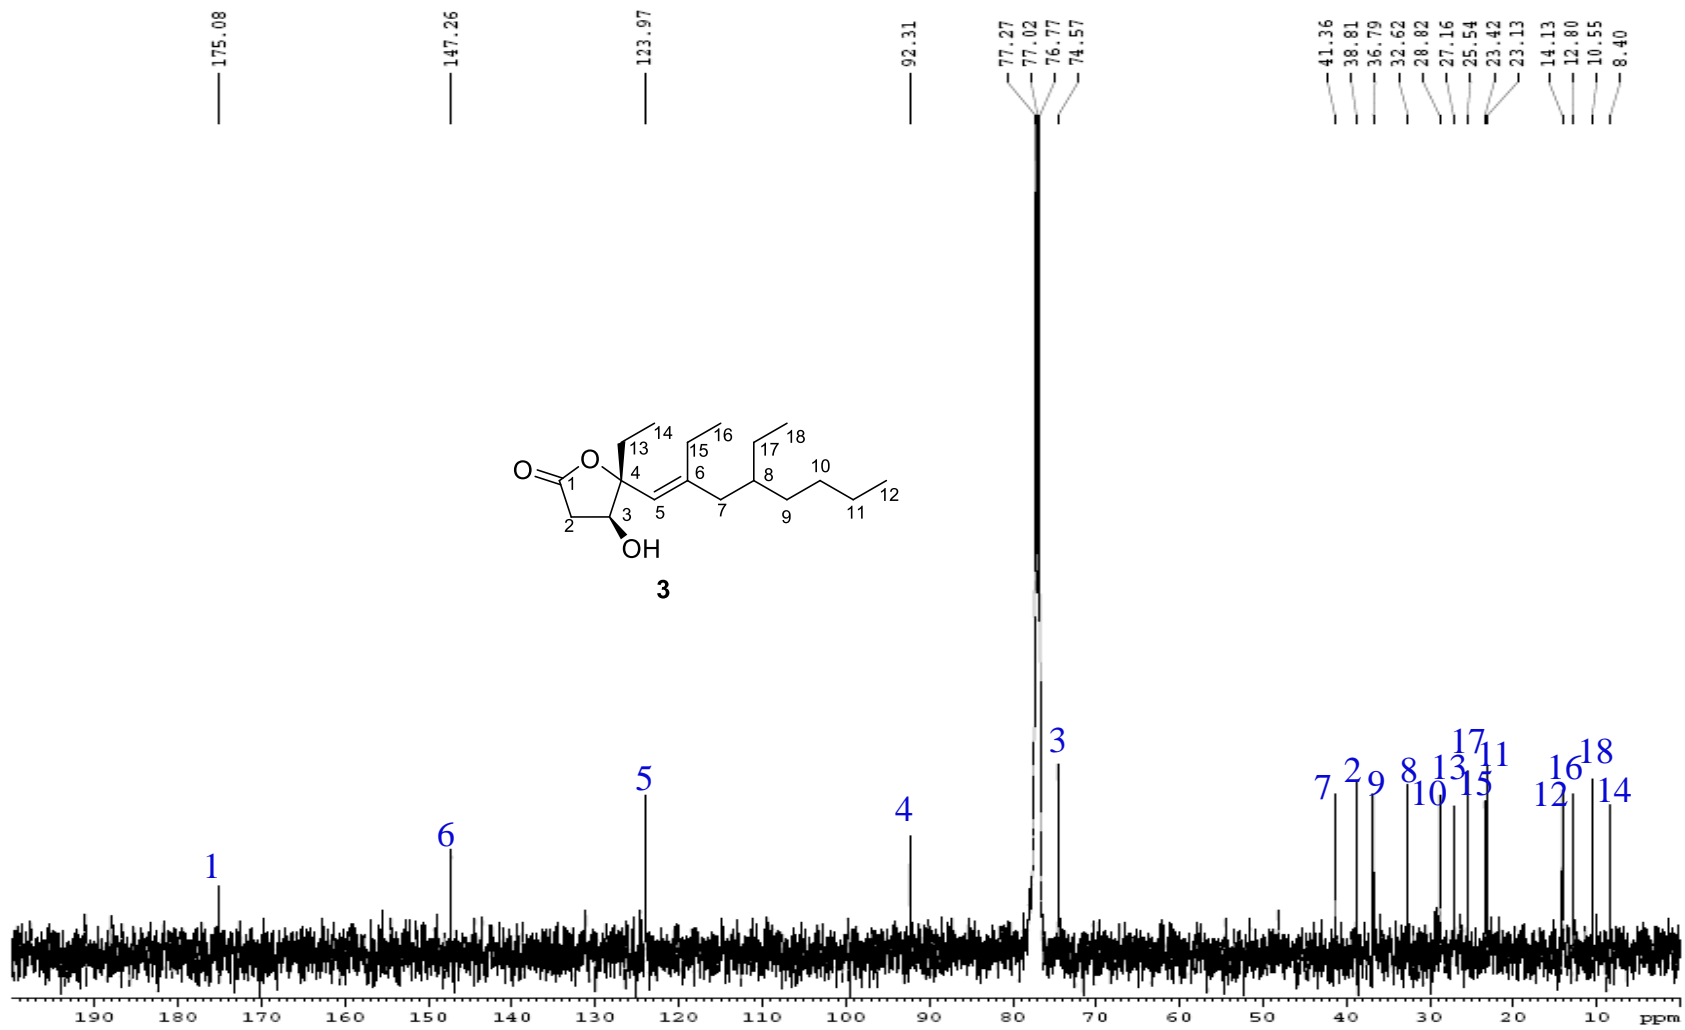

Figure S21.  $^1\text{H}$ - $^1\text{H}$  COSY spectrum of simplexolide C (**3**) in  $\text{CDCl}_3$ .

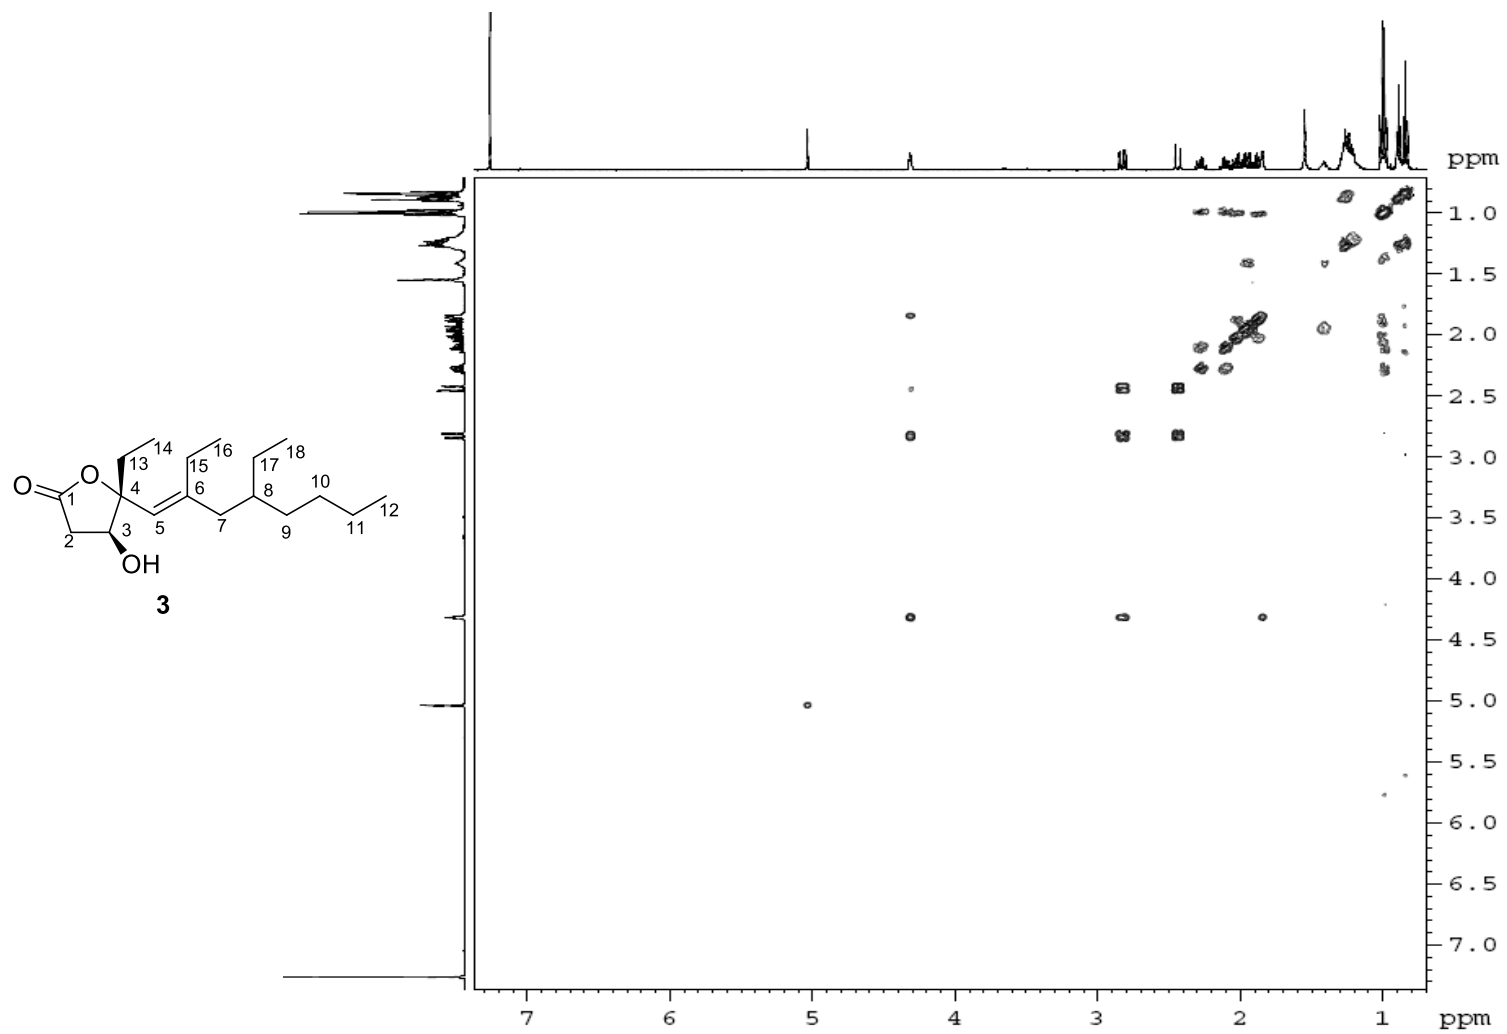



**Figure S22.** HSQC spectrum of simplexolide C (**3**) in CDCl<sub>3</sub>.

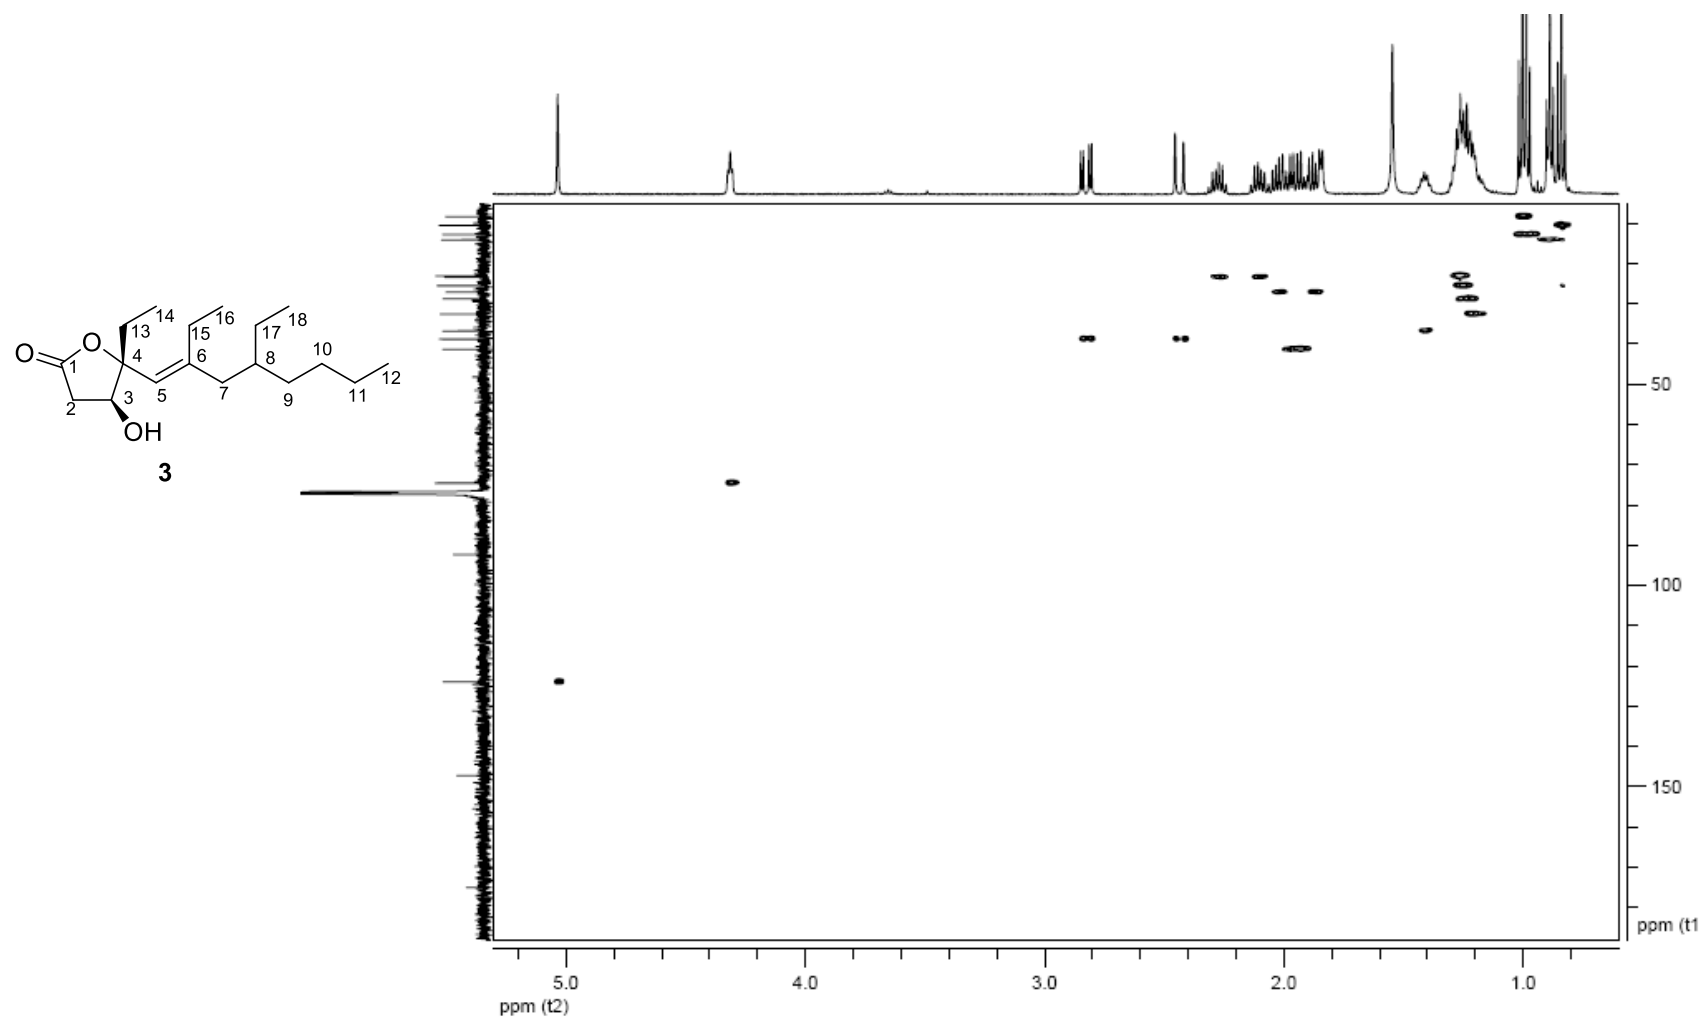

**Figure S23.** HMBC spectrum of simplexolide C (**3**) in CDCl<sub>3</sub>.

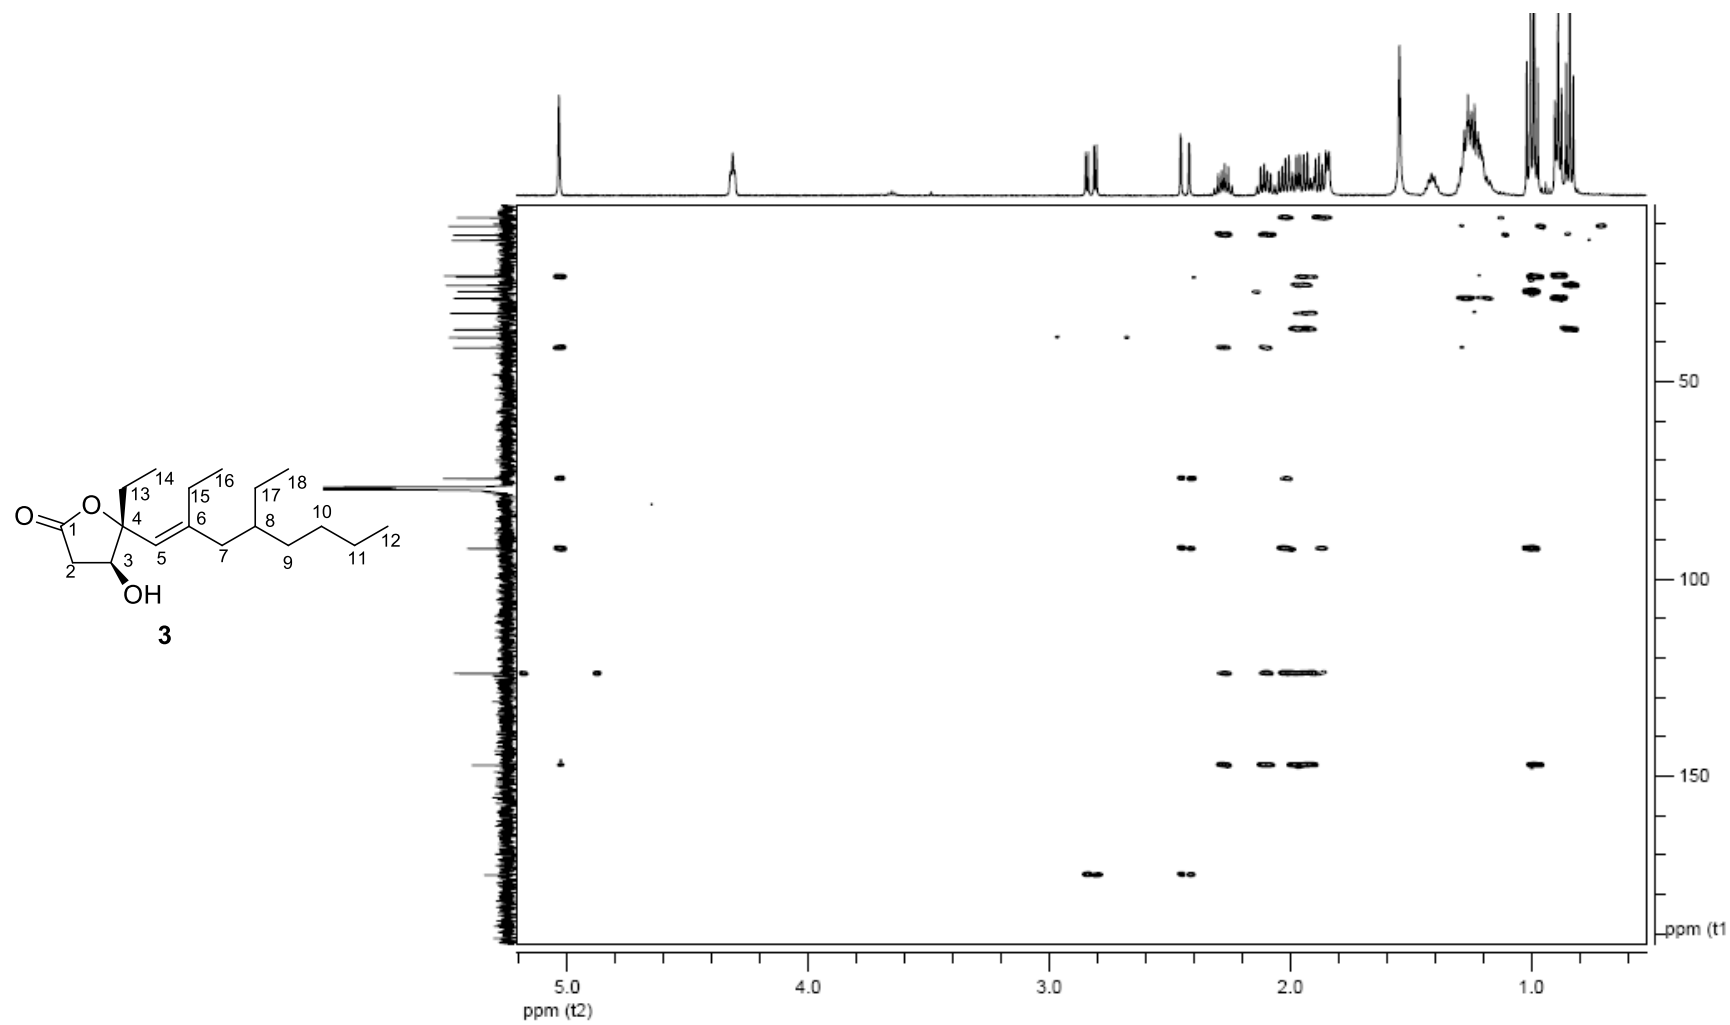

**Figure S24.** NOESY spectrum of simplexolide C (**3**) in CDCl<sub>3</sub>.

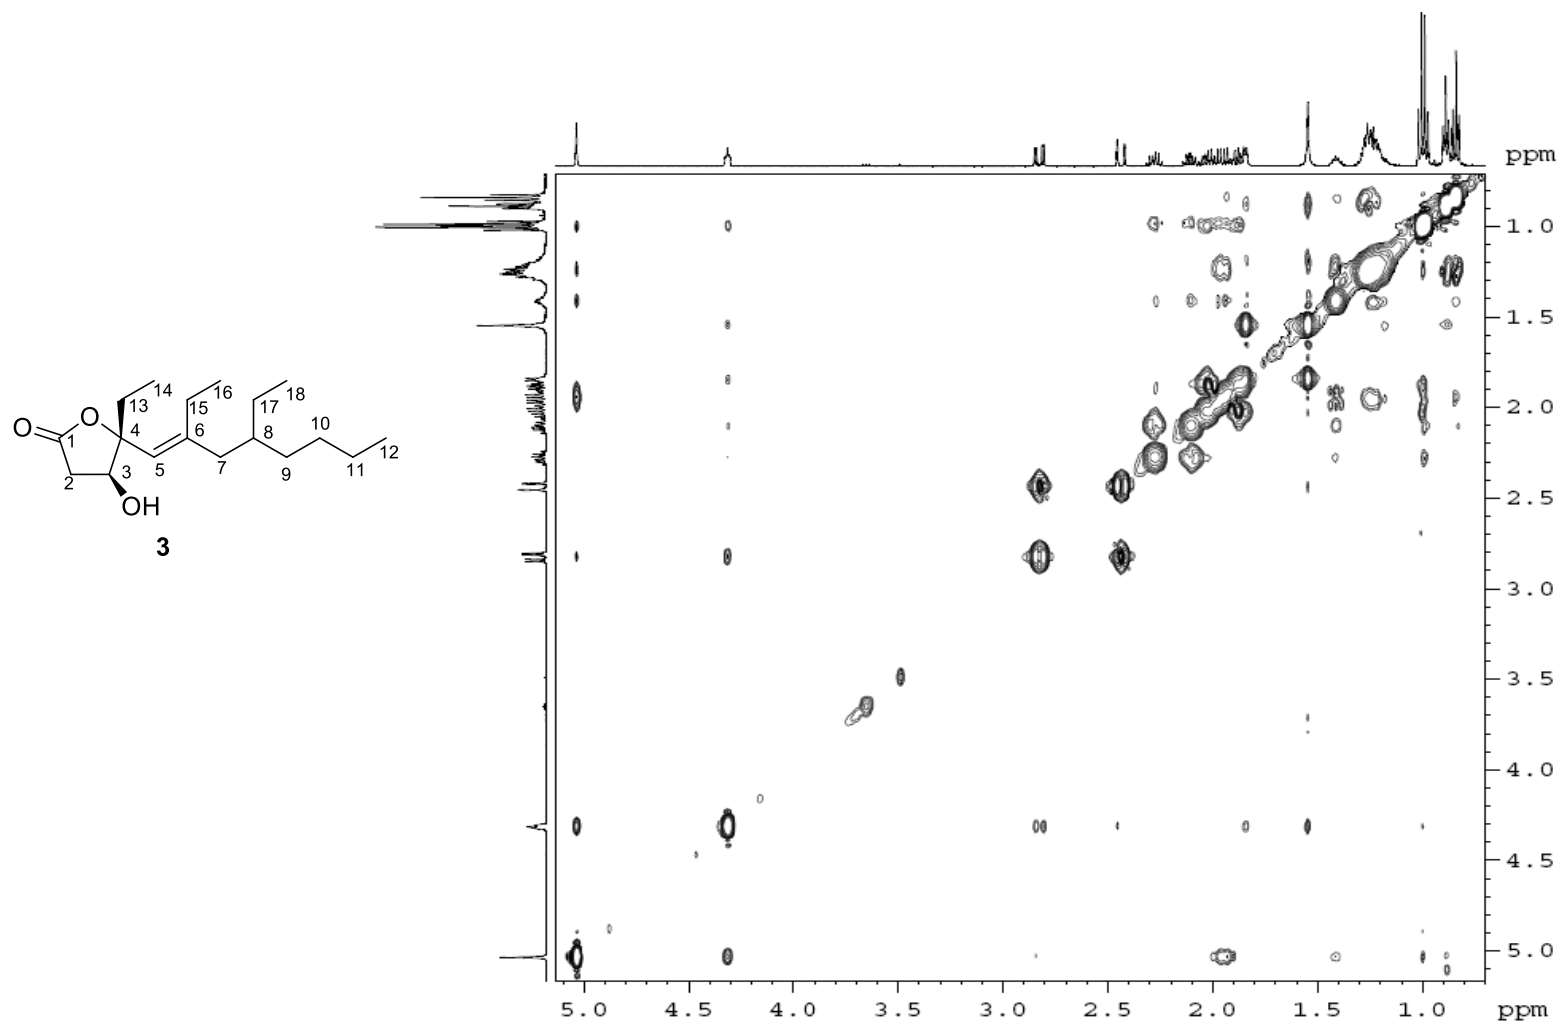

**Figure S25.** High resolution ESI mass spectrum of simplexolide D (4).

**Elemental Composition Report**

Tolerance = 10.0 PPM / DBE: min = -1.5, max = 50.0  
 Selected filters: None

Monoisotopic Mass, Even Electron Ions  
 17 formula(e) evaluated with 1 results within limits (up to 50 closest results for each mass)  
 Elements Used:  
 C: 5-30 H: 5-50 O: 1-5 Na: 1-1

SIP1  
 XF-23a M.W=296  
 WQ10195H 20 (0.691) AM (Cen,6, 80.00, Ar,5000.0,325.16,0.70); Sm (SG, 2x3.00); Cm (12:27)

21-May-2010,15:44:18  
 0.00000000  
 TOF MS ES+  
 7.67e5

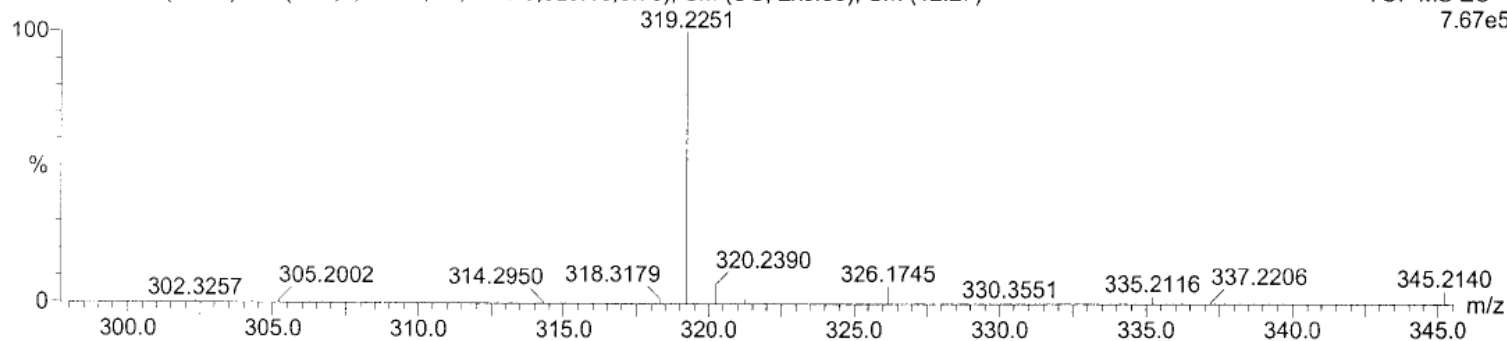

Minimum: 35.00  
 Maximum: 100.00

| Mass     | RA     | Calc. Mass | mDa | PPM | DBE | i-FIT   | Formula       |
|----------|--------|------------|-----|-----|-----|---------|---------------|
| 319.2251 | 100.00 | 319.2249   | 0.2 | 0.6 | 2.5 | 73541.7 | C18 H32 O3 Na |

Figure S26. IR spectrum of simplexolide D (4).

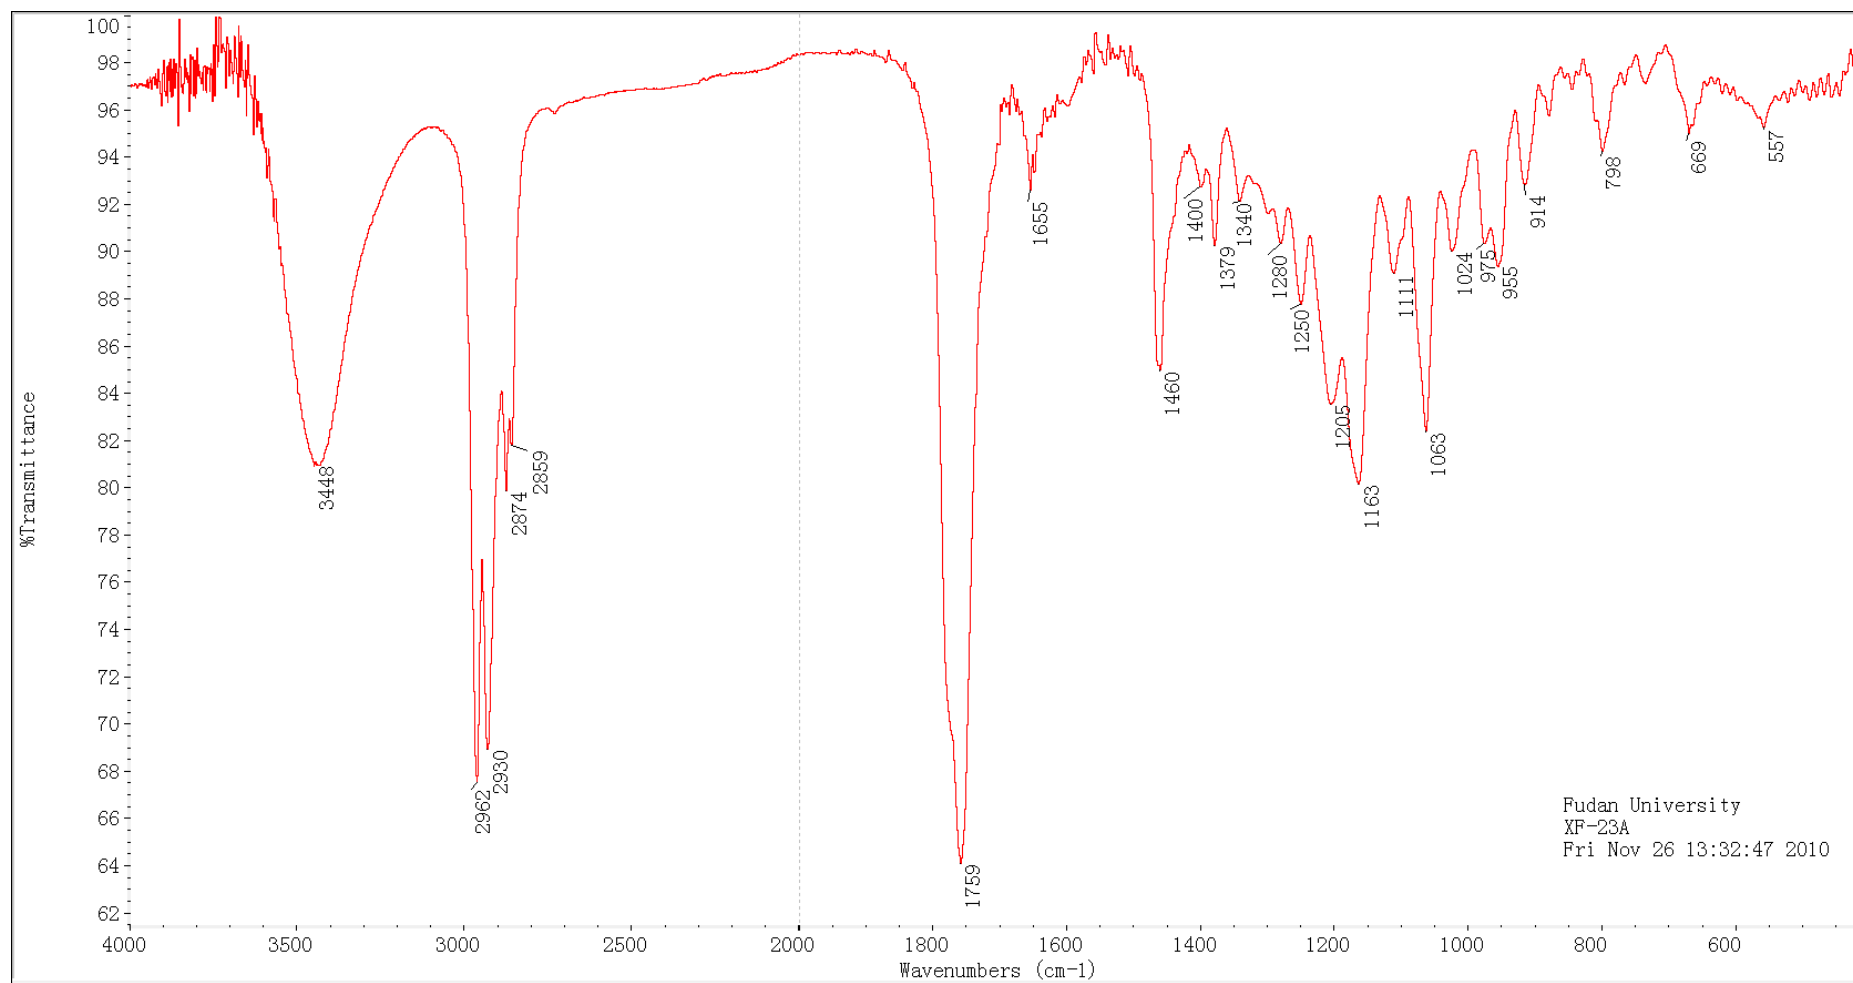

**Figure S27.**  $^1\text{H}$  NMR spectrum of simplexolide D (**4**) in  $\text{CDCl}_3$ .

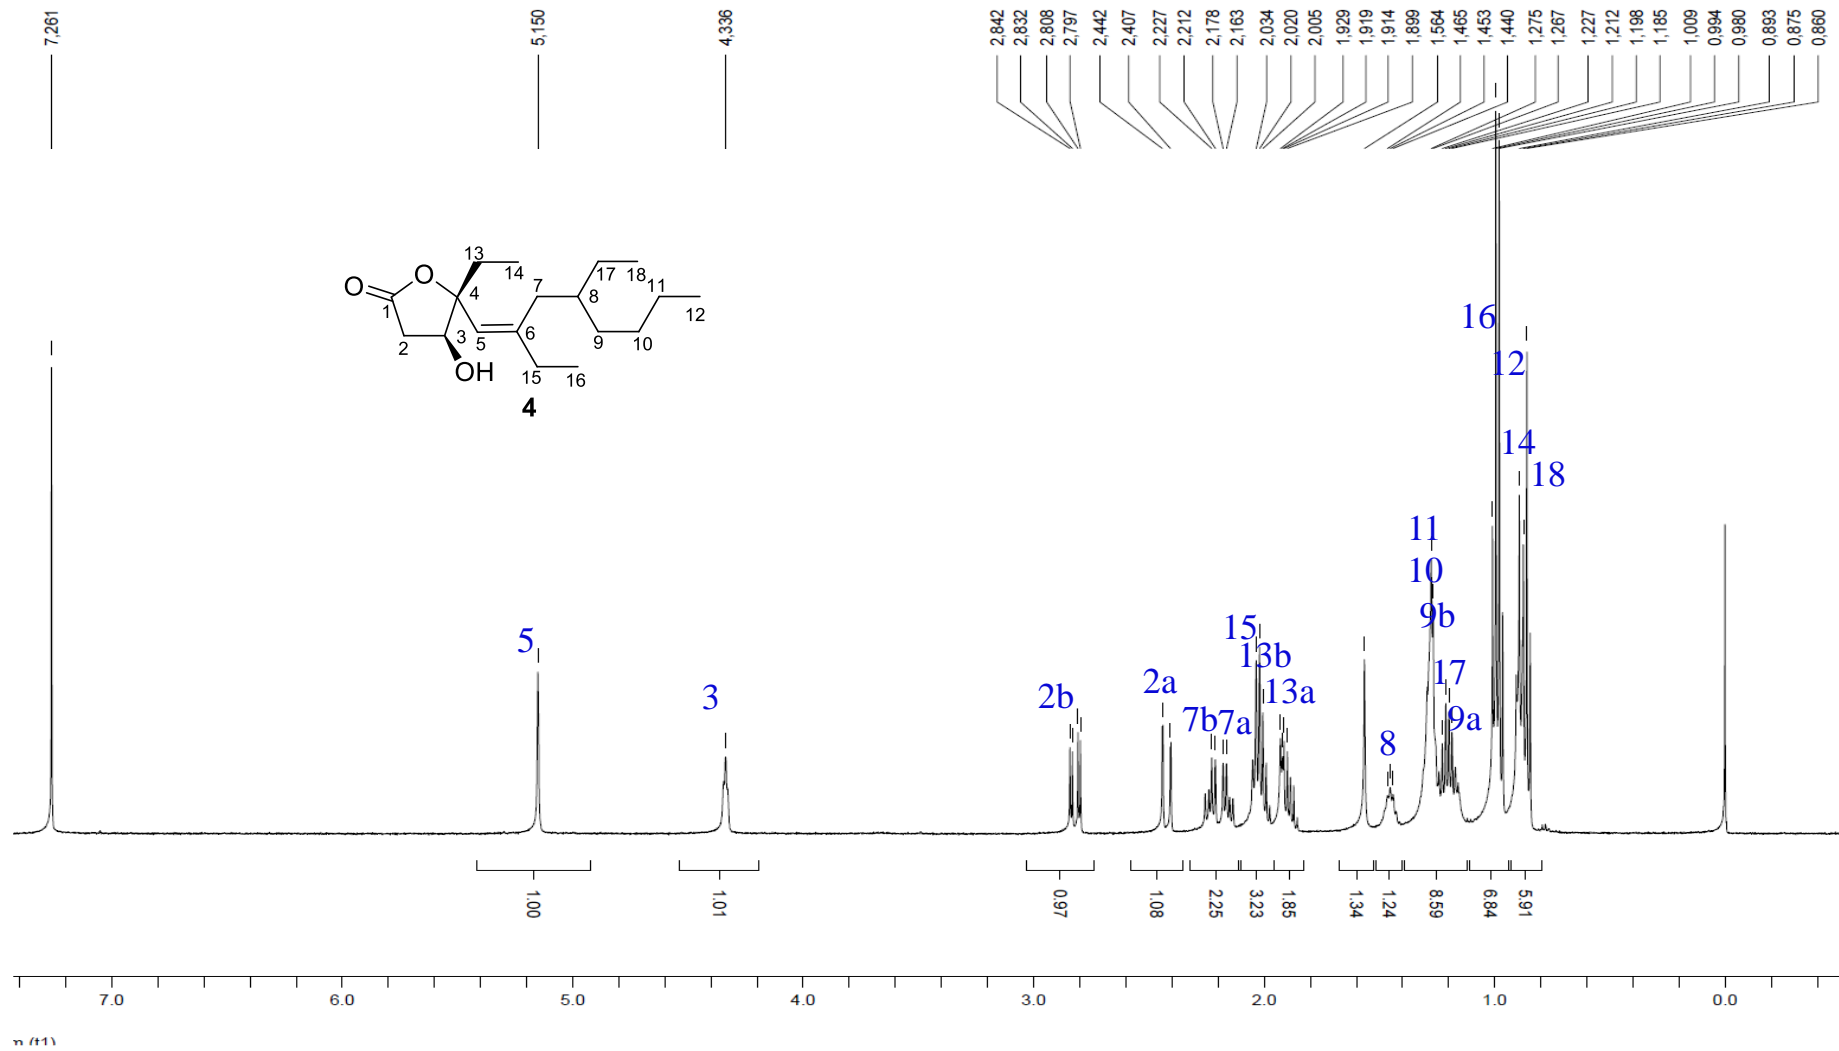

Figure S28.  $^{13}\text{C}$  NMR spectrum of simplexolide D (**4**) in  $\text{CDCl}_3$ .

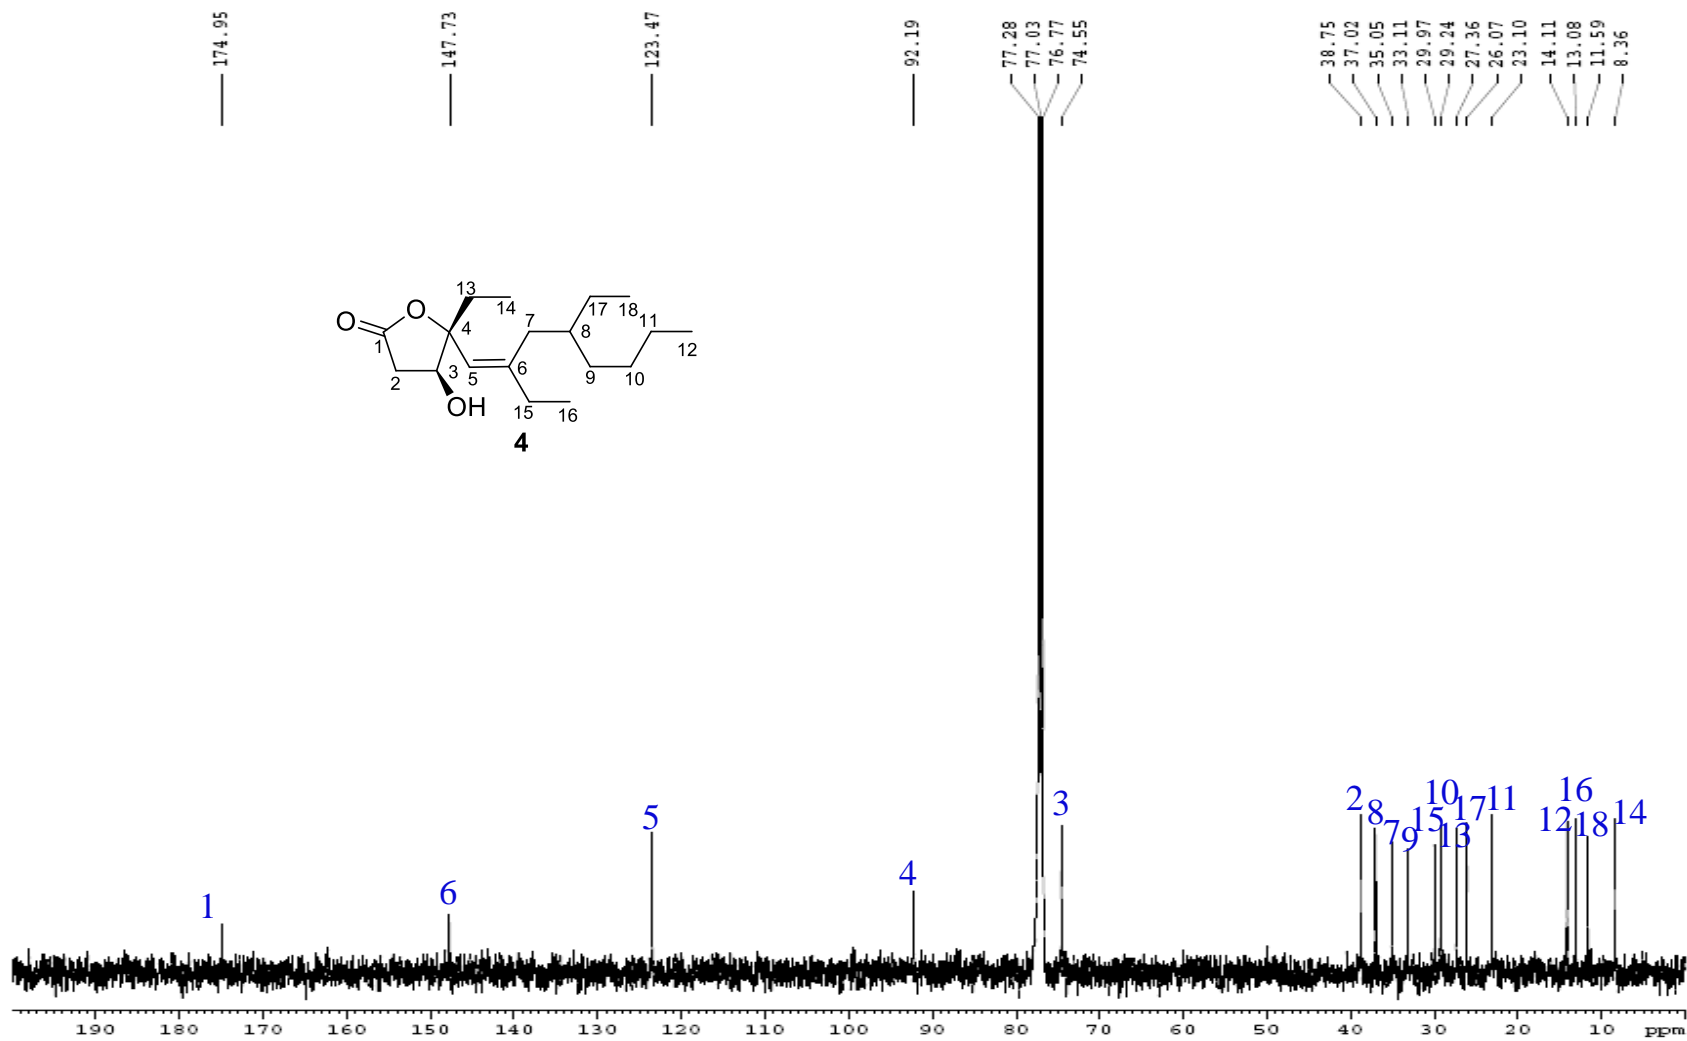

**Figure S29.**  $^1\text{H}$ - $^1\text{H}$  COSY spectrum of simplexolide D (**4**) in  $\text{CDCl}_3$ .

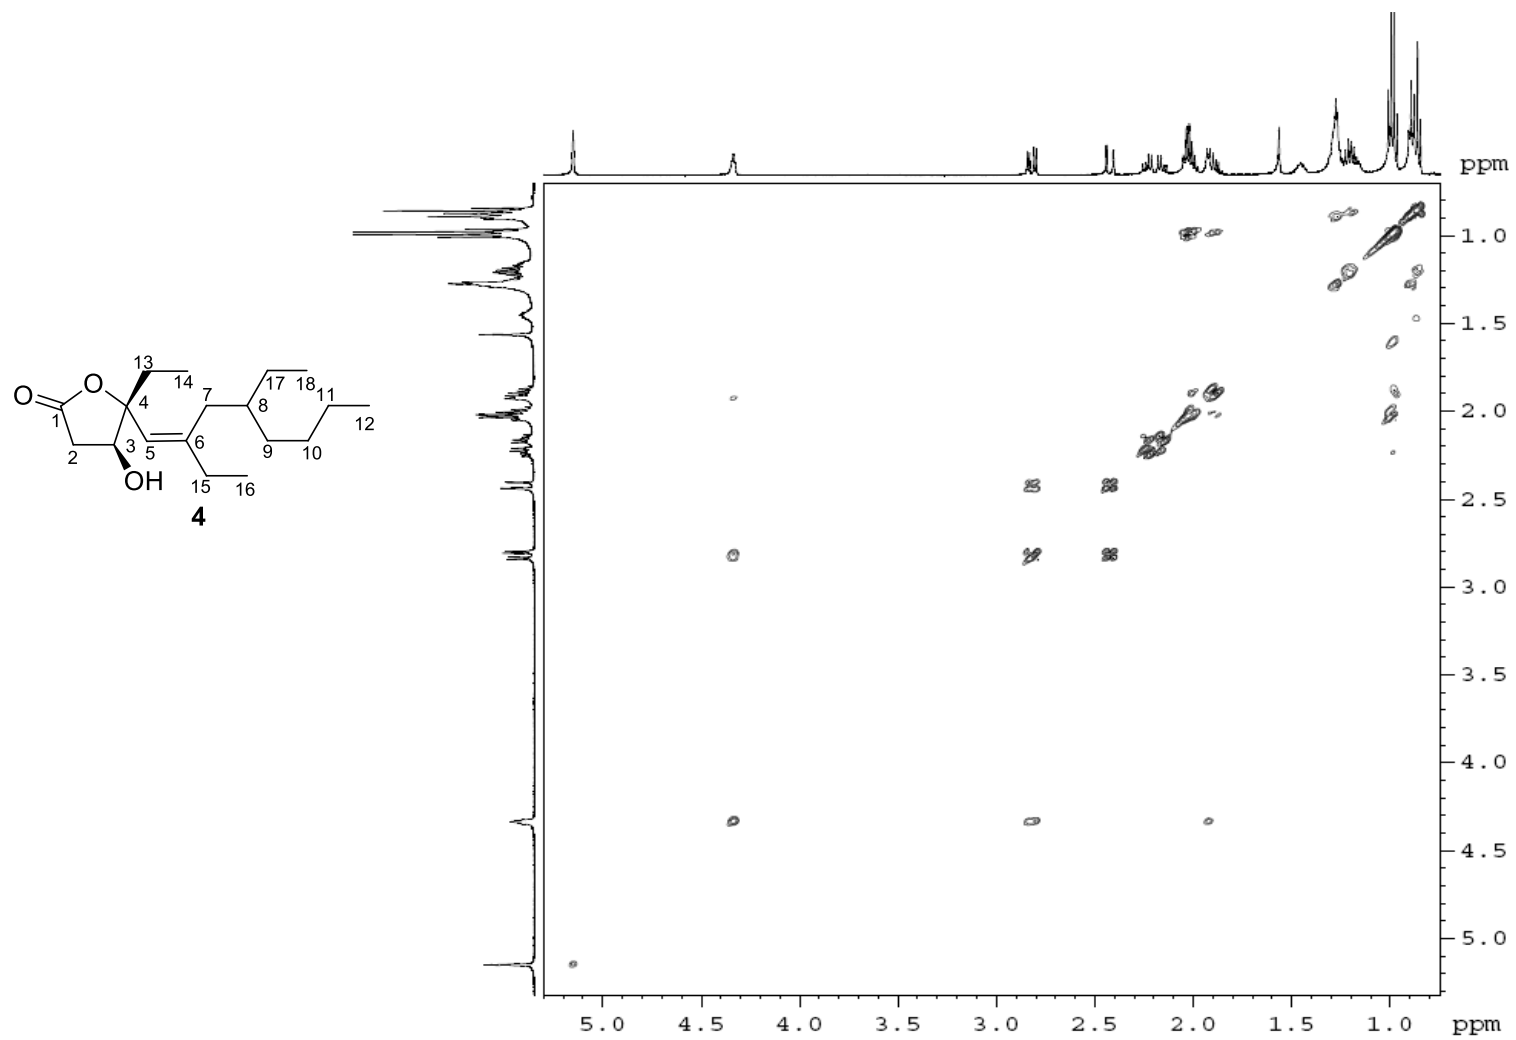



**Figure S30.** HSQC spectrum of simplexolide D (**4**) in CDCl<sub>3</sub>.

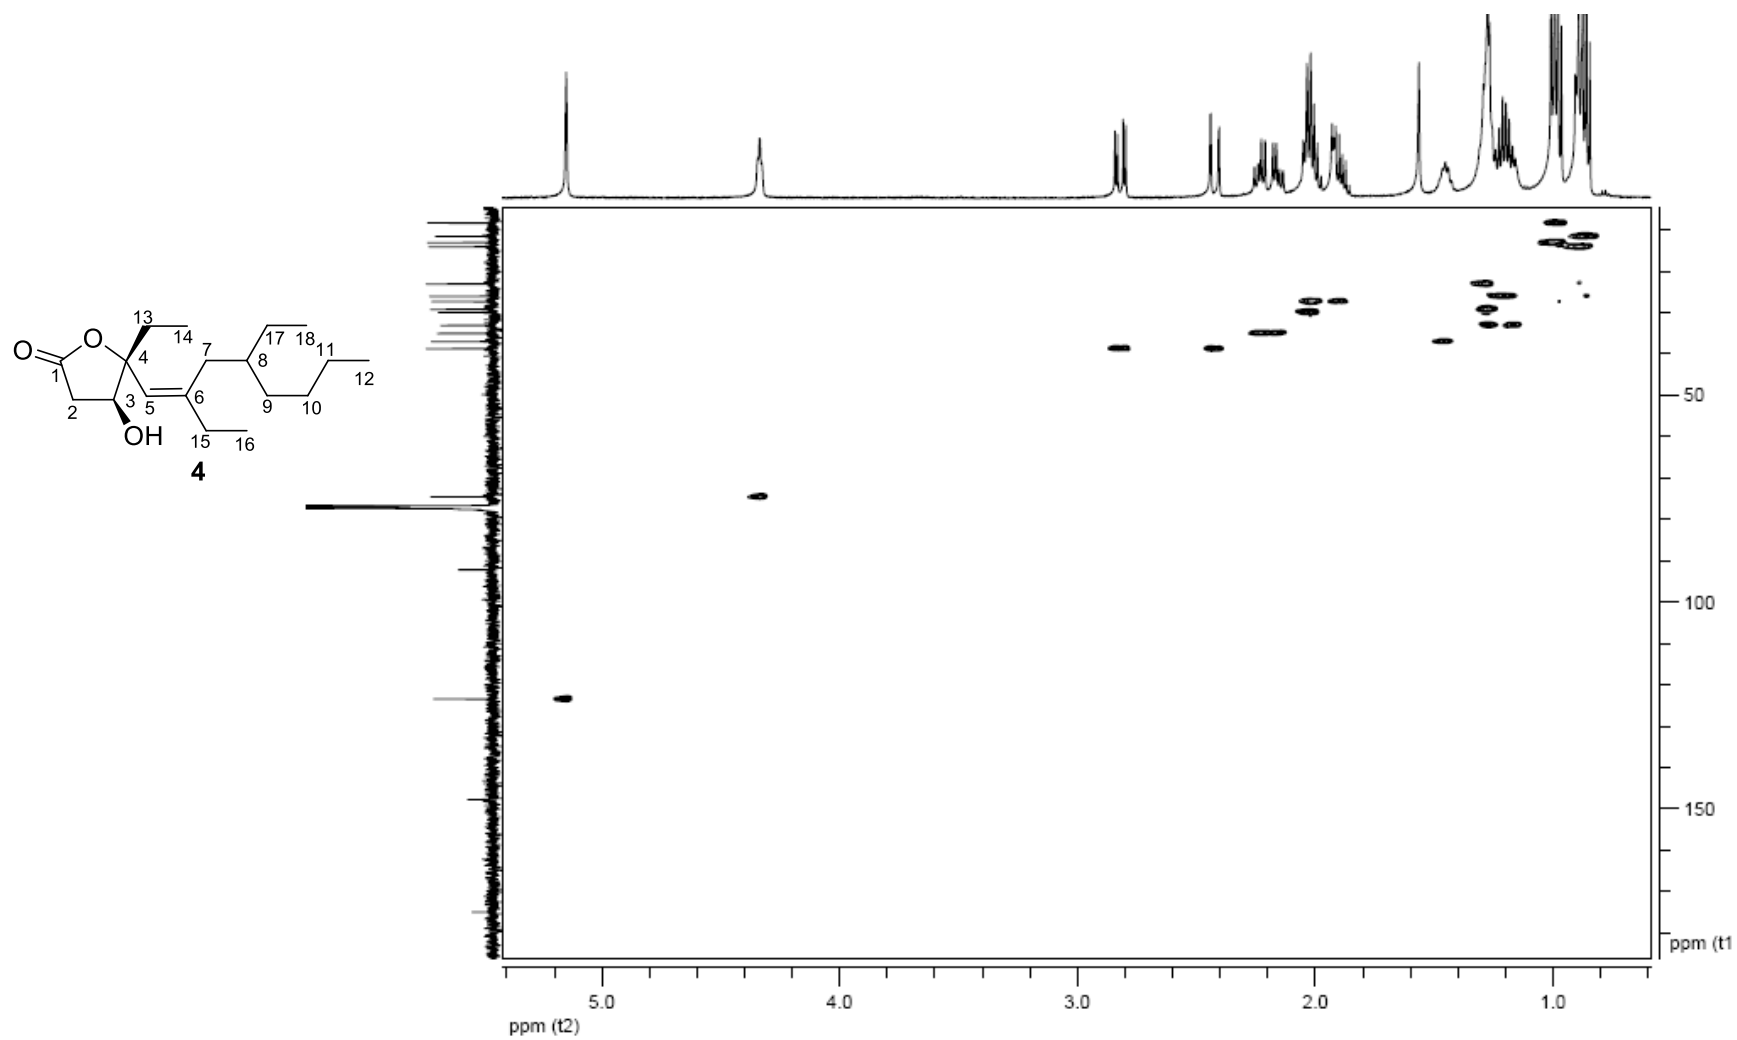

**Figure S31.** HMBC spectrum of simplexolide D (**4**) in CDCl<sub>3</sub>.

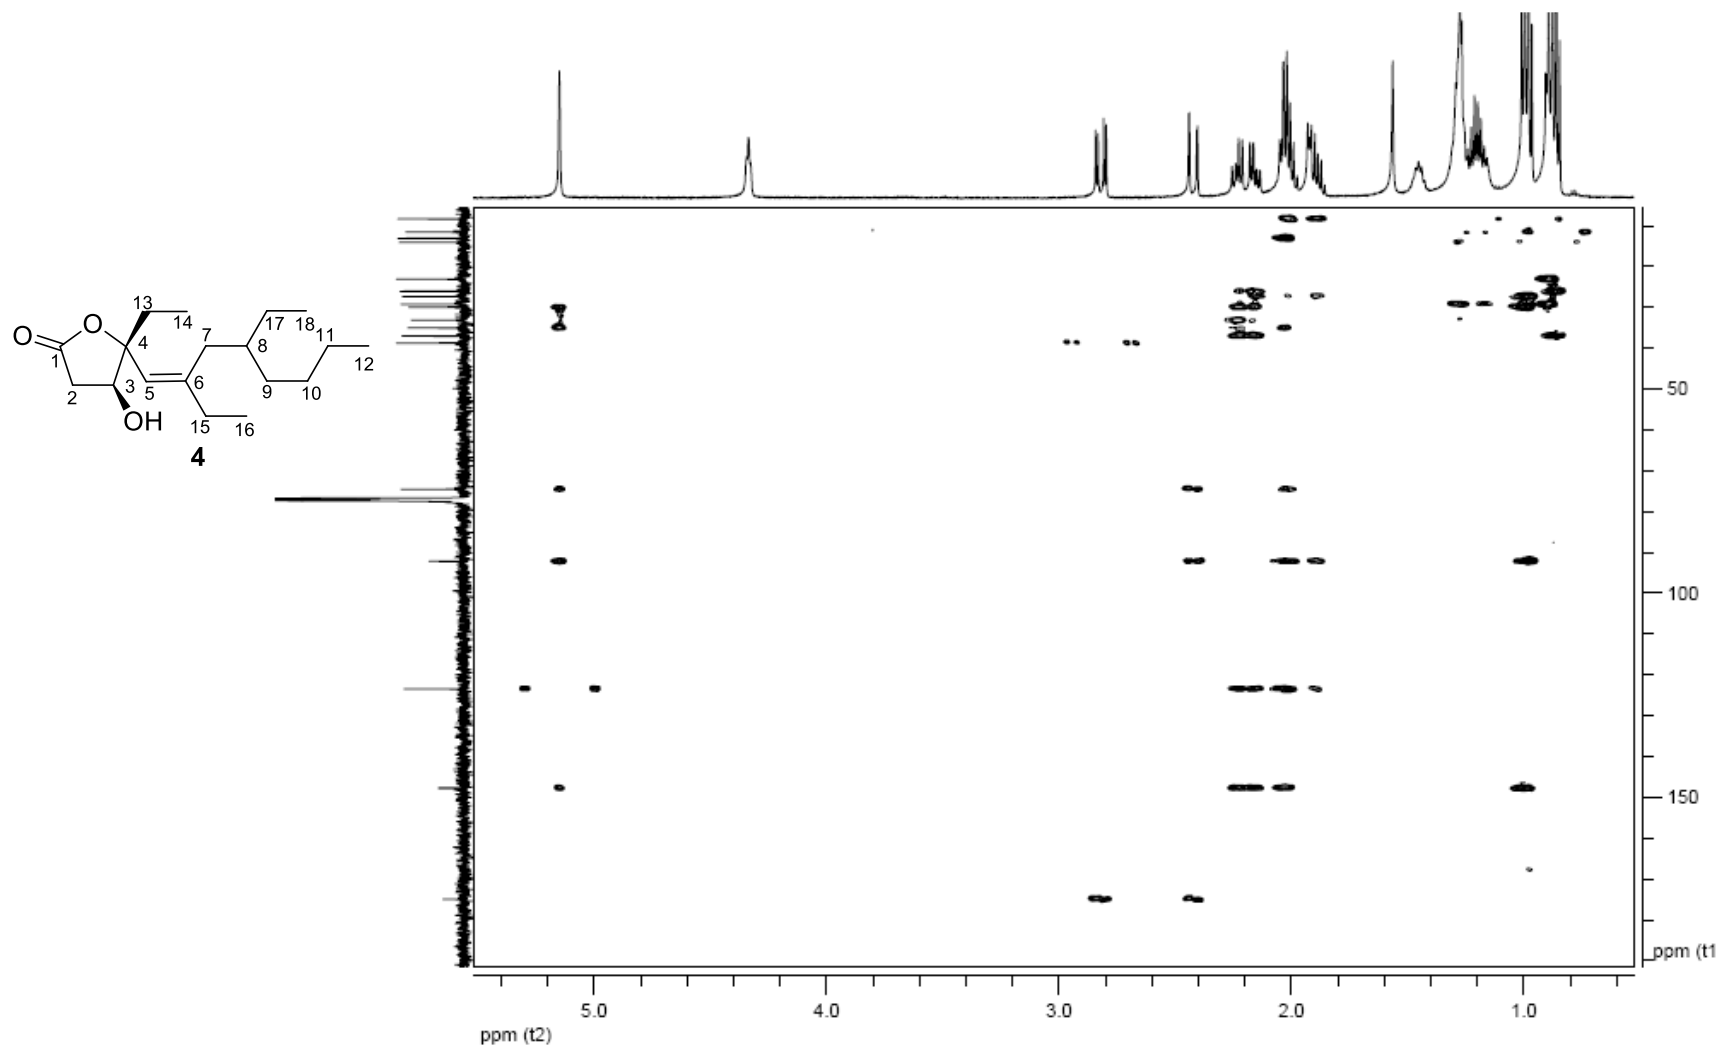

**Figure S32.** NOESY spectrum of simplexolide D (**4**) in CDCl<sub>3</sub>.

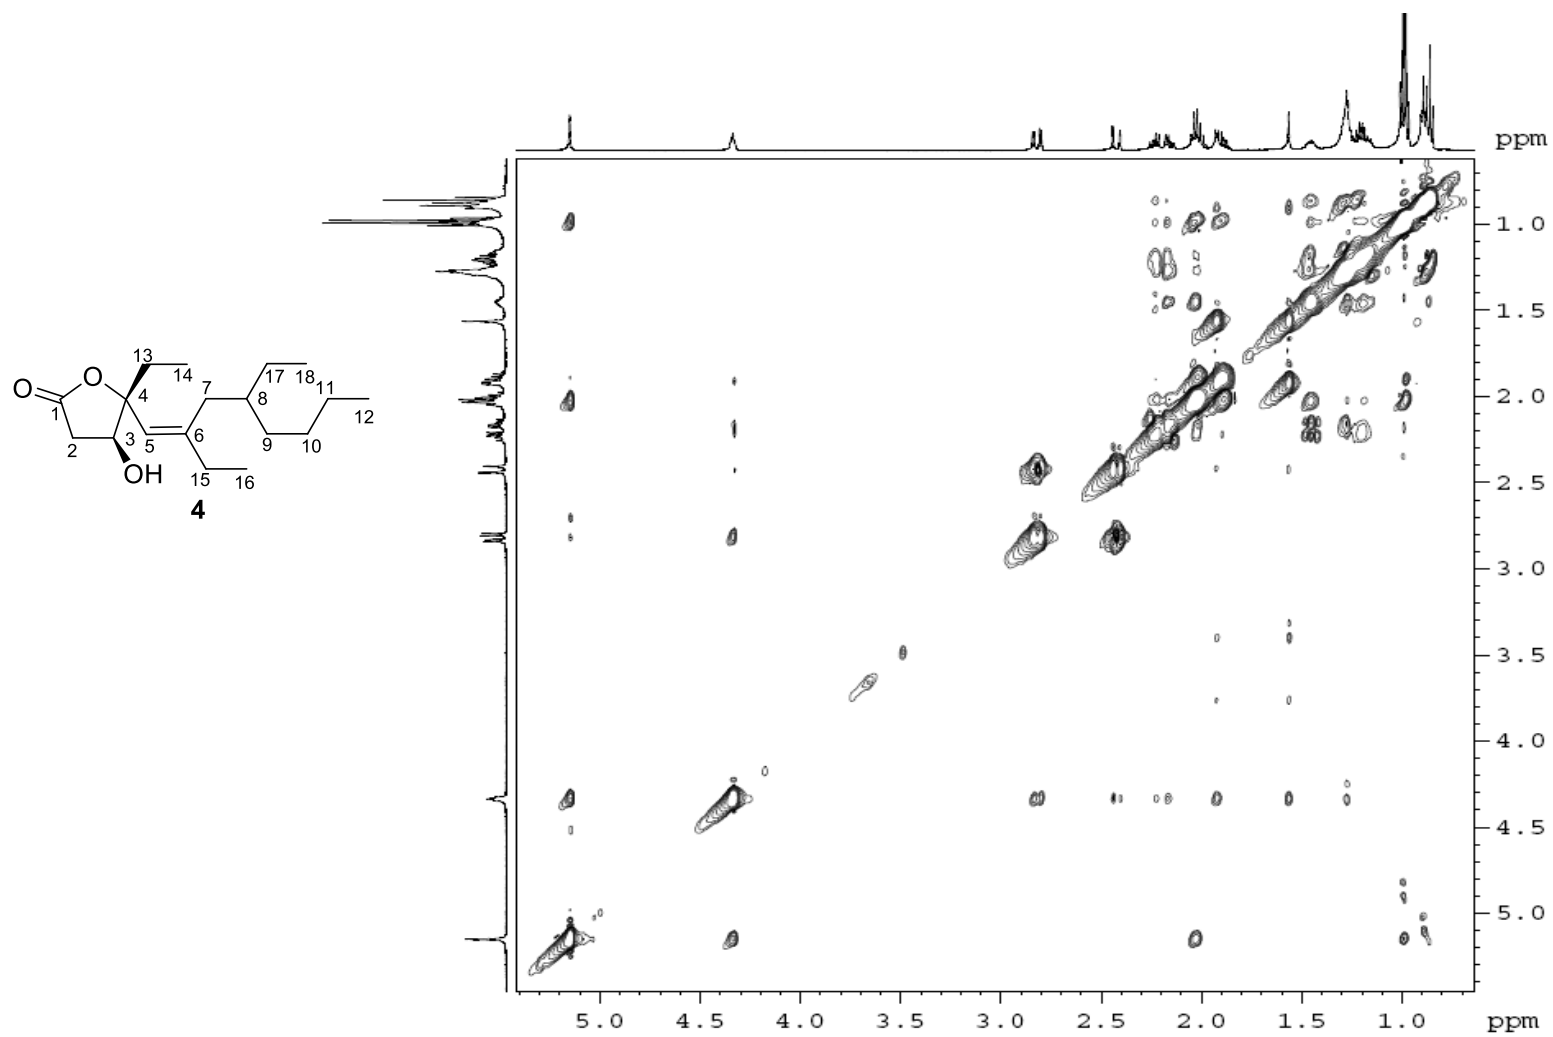

**Figure S33.** High resolution ESI mass spectrum of simplexolide E (**5**).

**Elemental Composition Report**

Tolerance = 10.0 PPM / DBE: min = -1.5, max = 50.0  
 Selected filters: None

Monoisotopic Mass, Even Electron Ions

17 formula(e) evaluated with 1 results within limits (up to 50 closest results for each mass)

Elements Used:

C: 5-30 H: 5-50 O: 1-5 Na: 1-1

SIPI

XF-22b M.W=282

WQ10197H1 50 (1.728) AM (Cen,6, 80.00, Ar,5000.0,325.16,0.70); Sm (SG, 2x3.00); Cm (30:60)

24-May-2010,11:20:57

0.00000000

TOF MS ES+

1.20e6

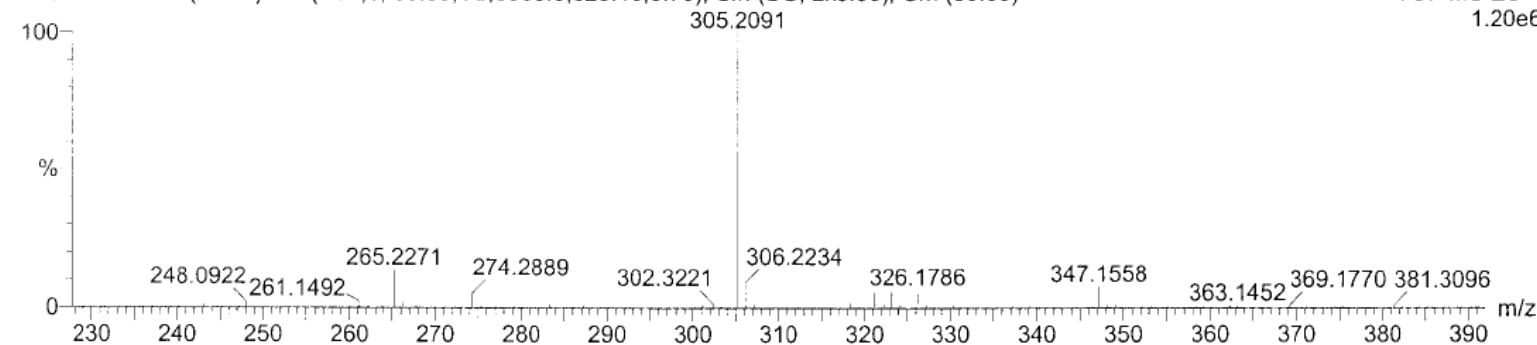

Minimum: 35.00 -1.5  
 Maximum: 100.00 5.0 10.0 50.0

| Mass     | RA     | Calc. Mass | mDa  | PPM  | DBE | i-FIT   | Formula       |
|----------|--------|------------|------|------|-----|---------|---------------|
| 305.2091 | 100.00 | 305.2093   | -0.2 | -0.7 | 2.5 | 58921.2 | C17 H30 O3 Na |

Figure S34. IR spectrum of simplexolide E (5).

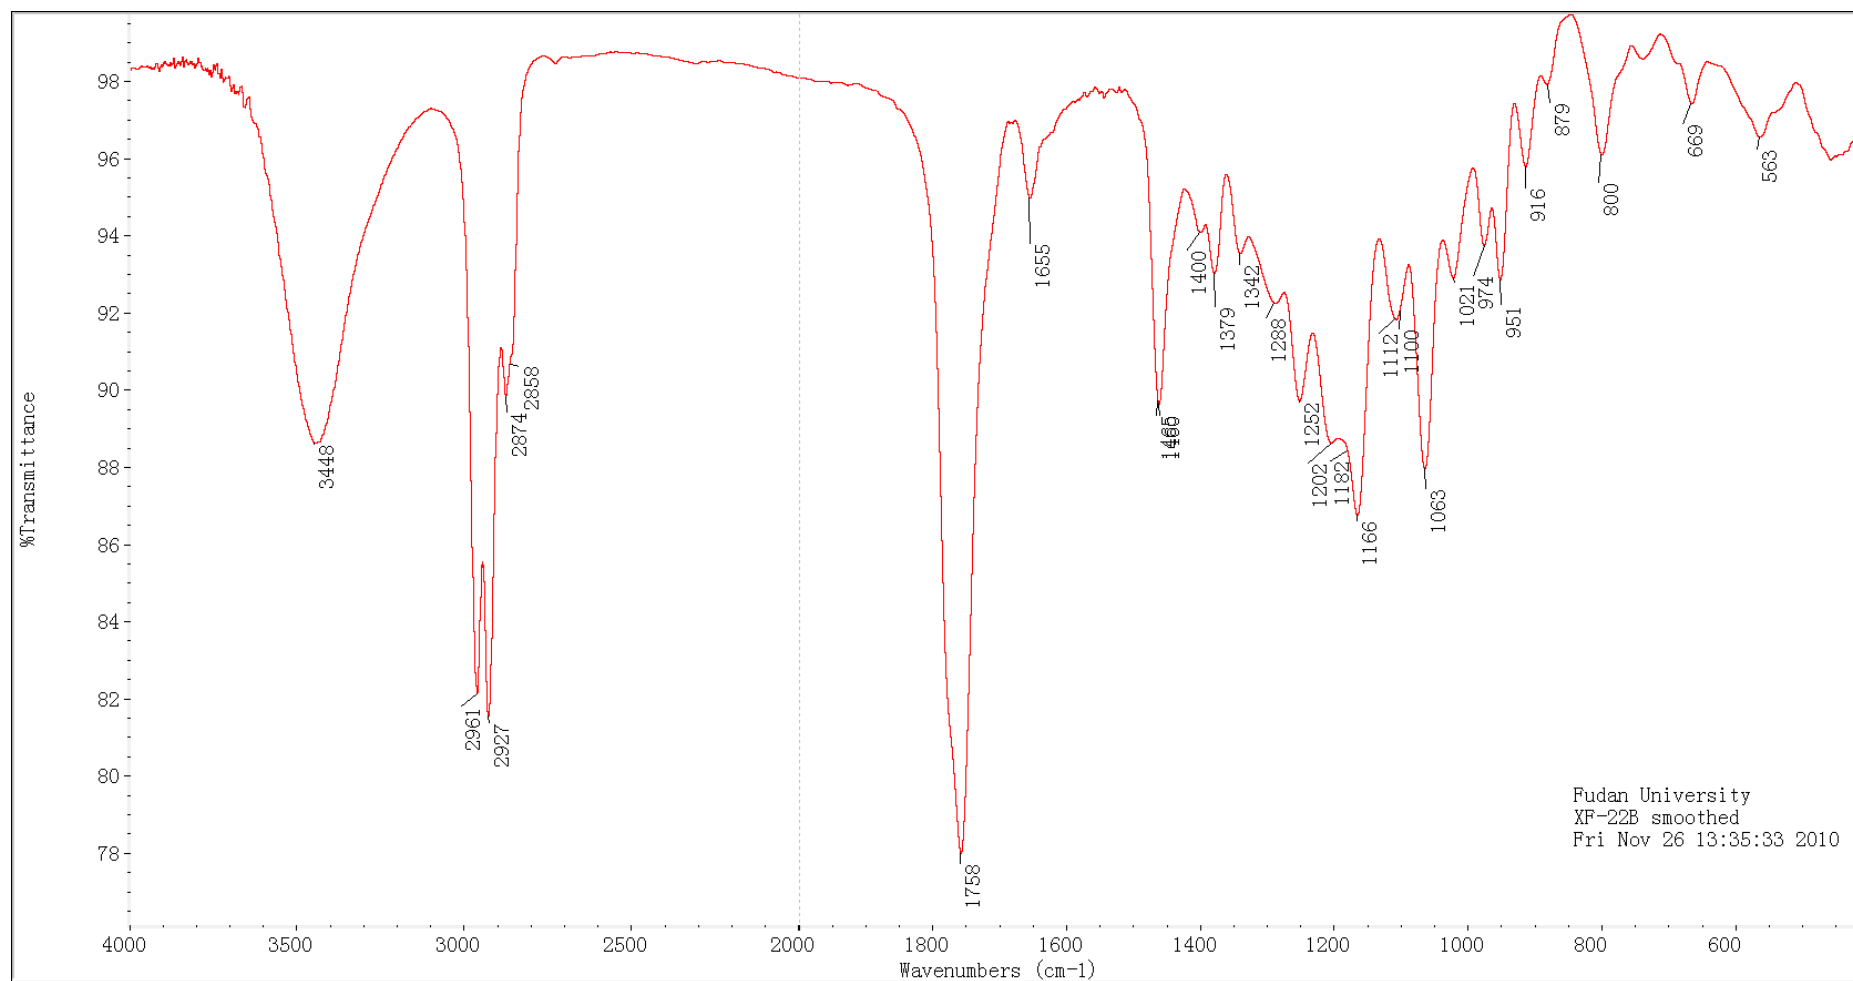

Figure S35.  $^1\text{H}$  NMR spectrum of simplexolide E (**5**) in  $\text{CDCl}_3$ .

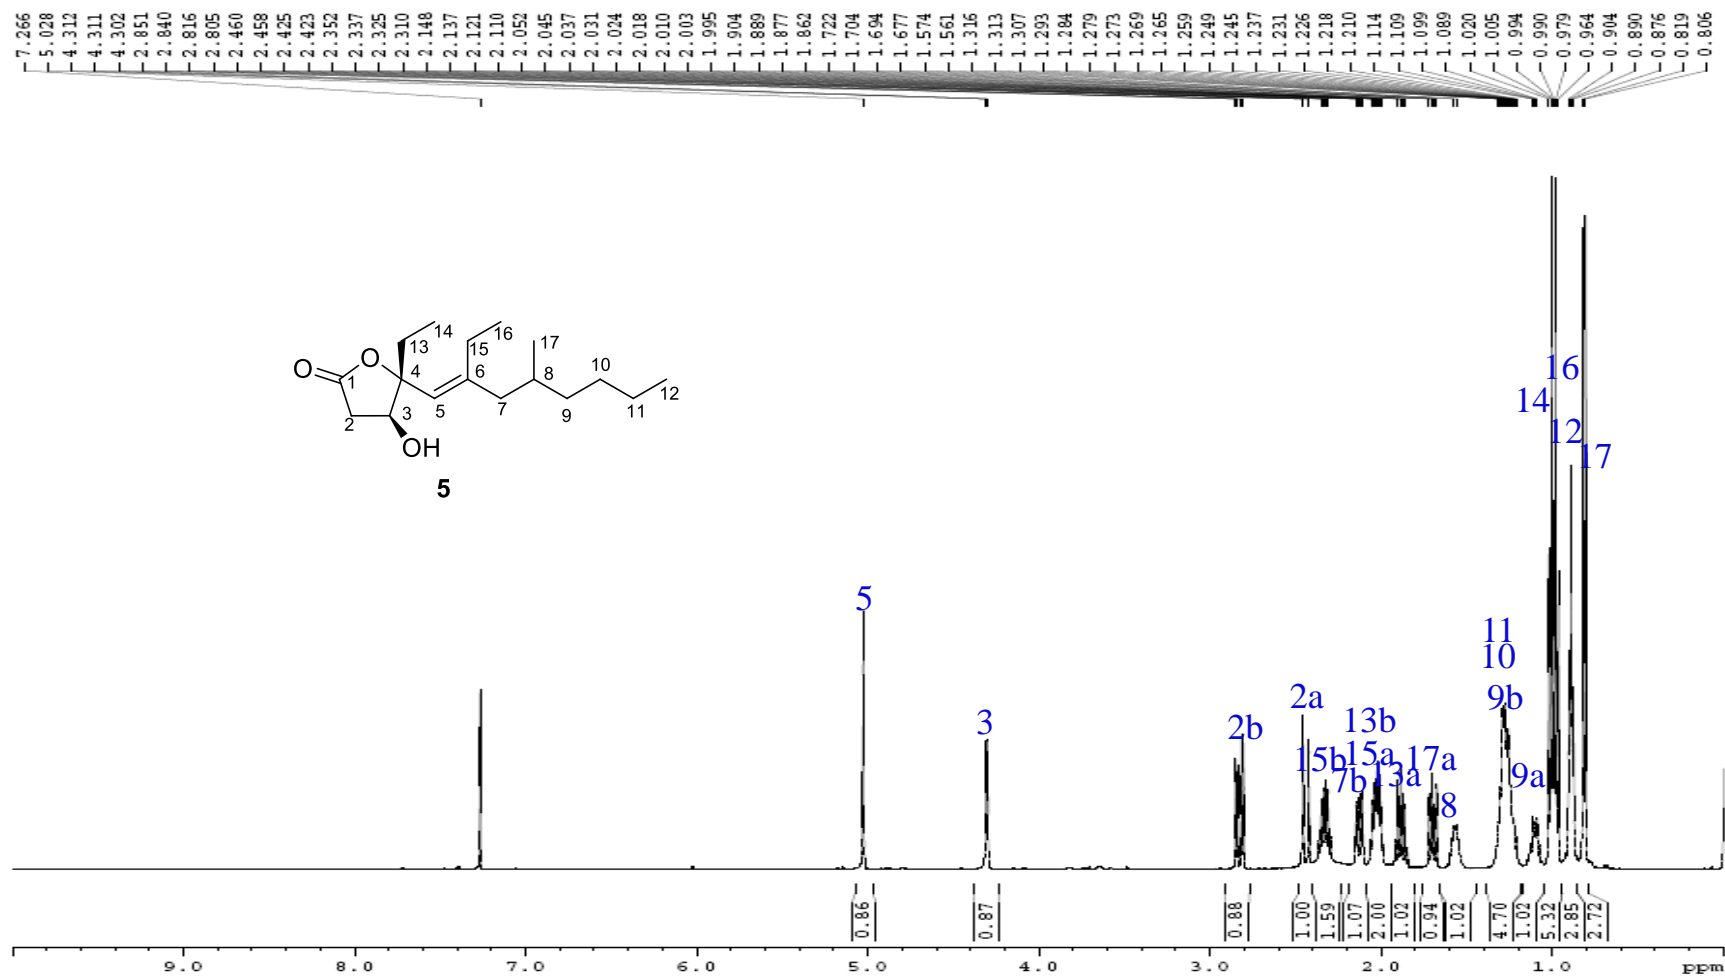

Figure S36.  $^{13}\text{C}$  NMR spectrum of simplexolide E (**5**) in  $\text{CDCl}_3$ .

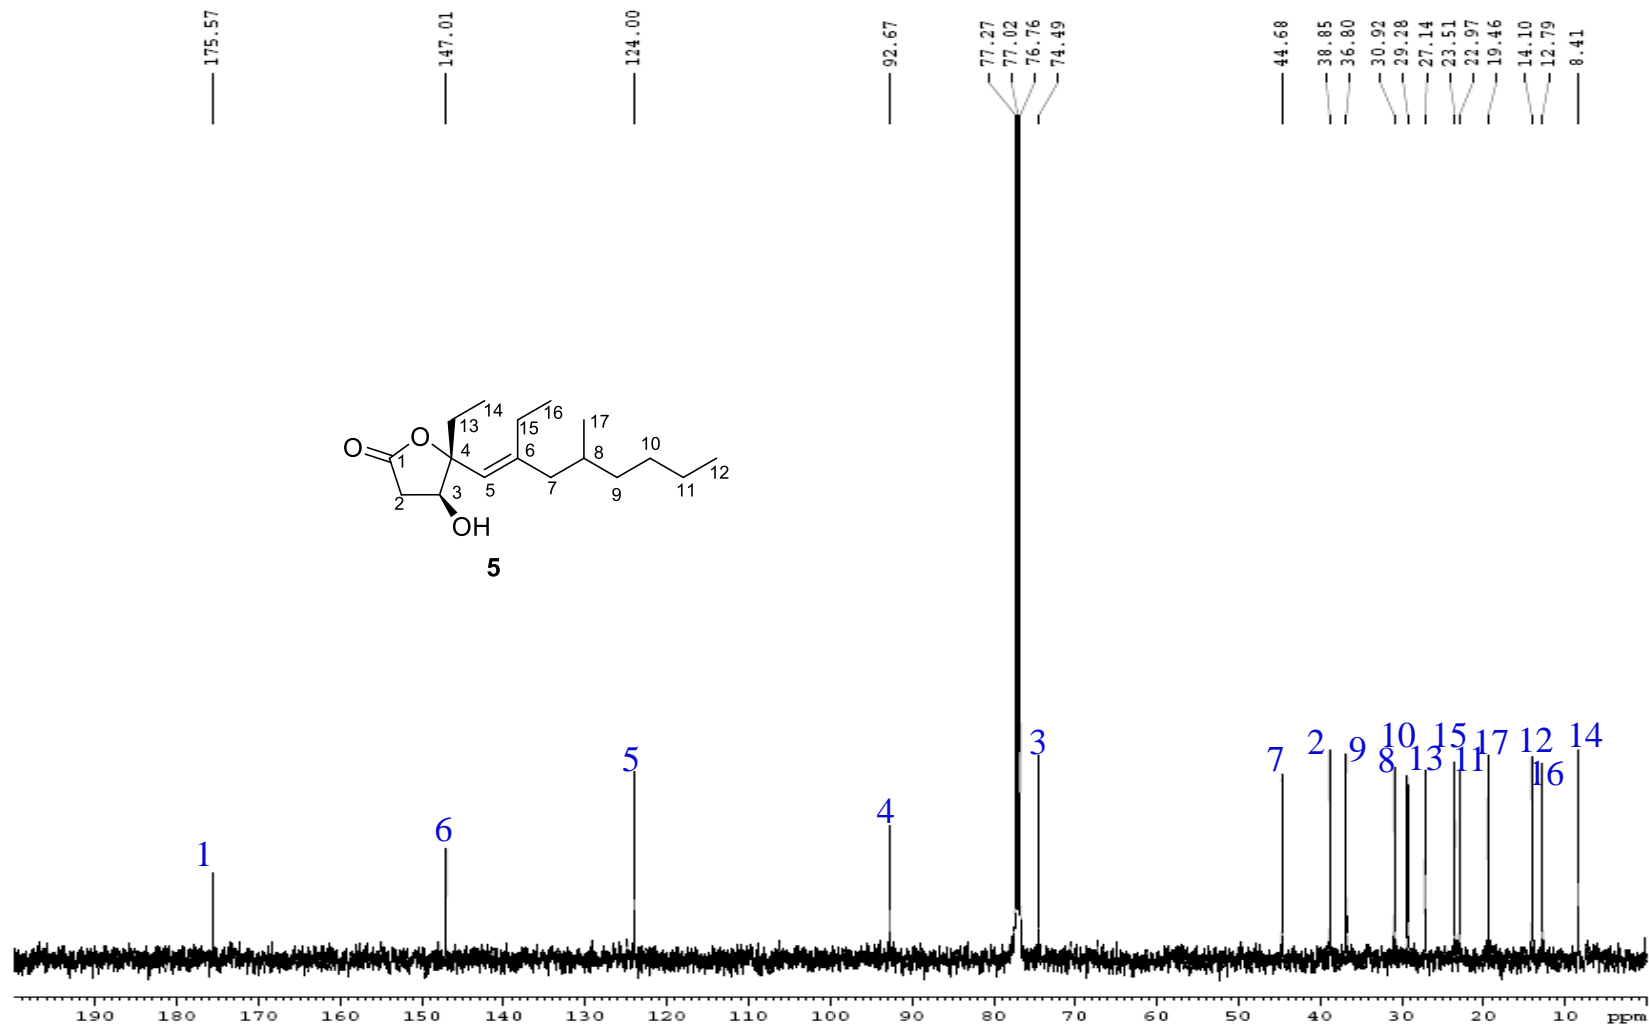

Figure S37.  $^1\text{H}$ - $^1\text{H}$  COSY spectrum of simplexolide E (**5**) in  $\text{CDCl}_3$ .

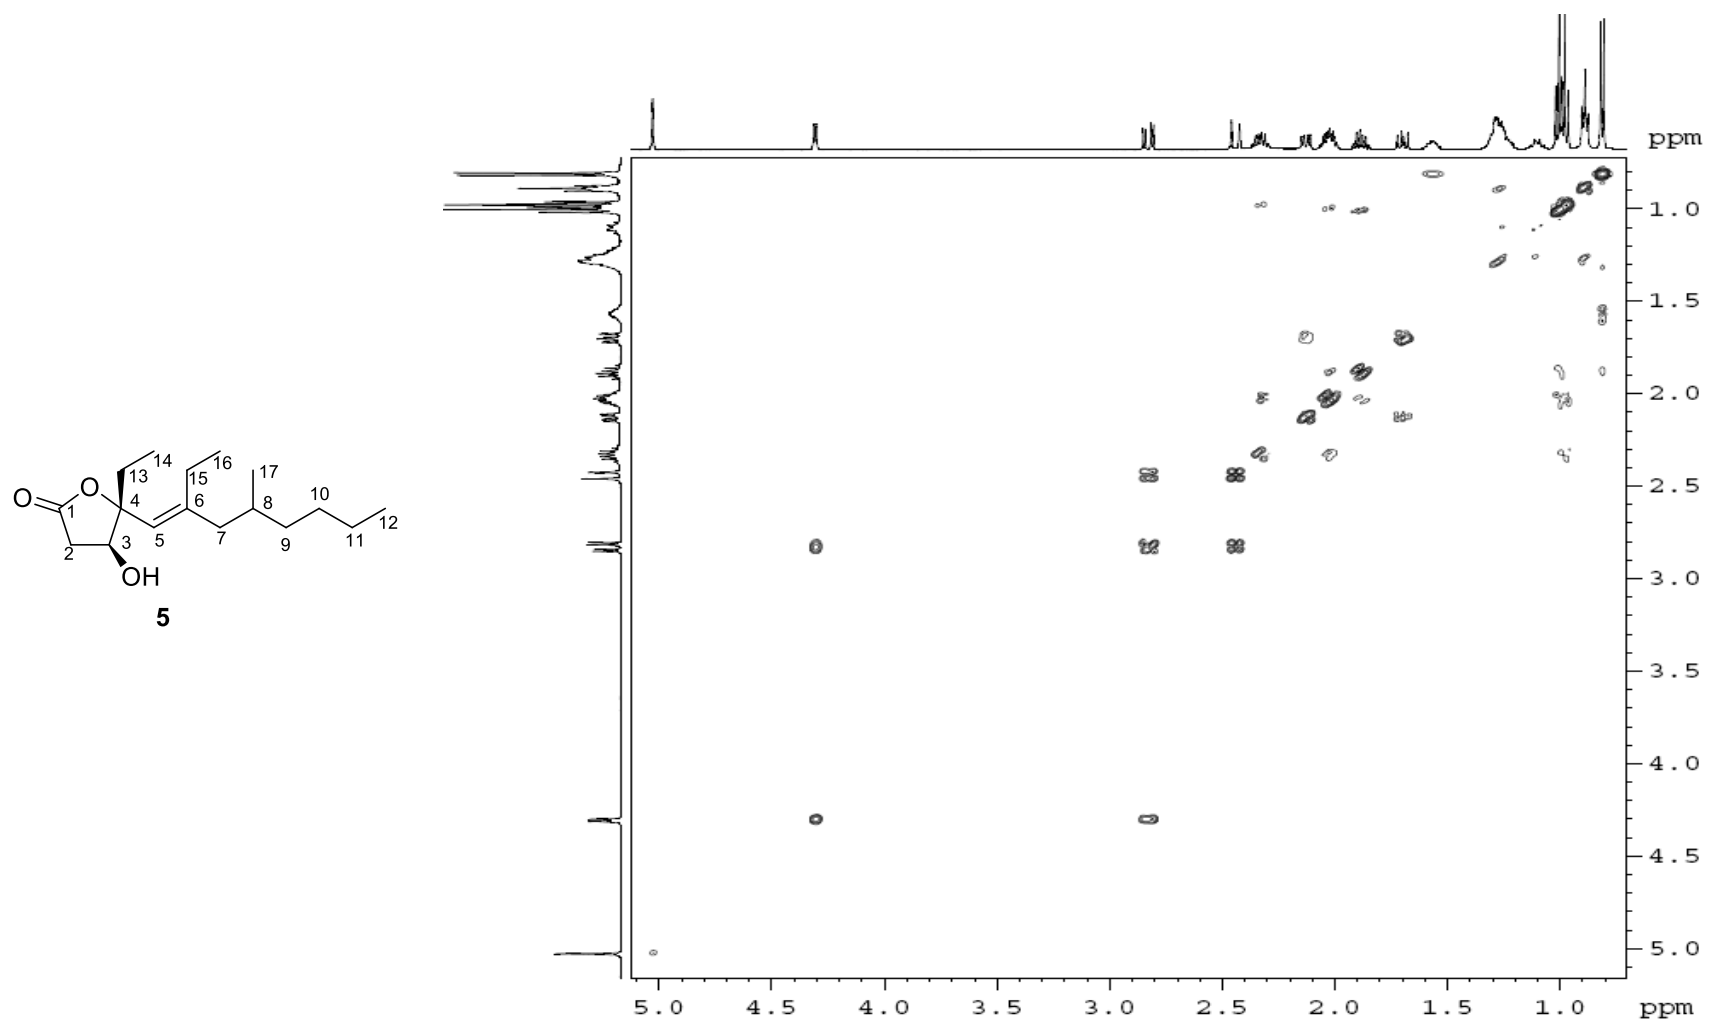



**Figure S38.** HSQC spectrum of simplexolide E (**5**) in CDCl<sub>3</sub>.

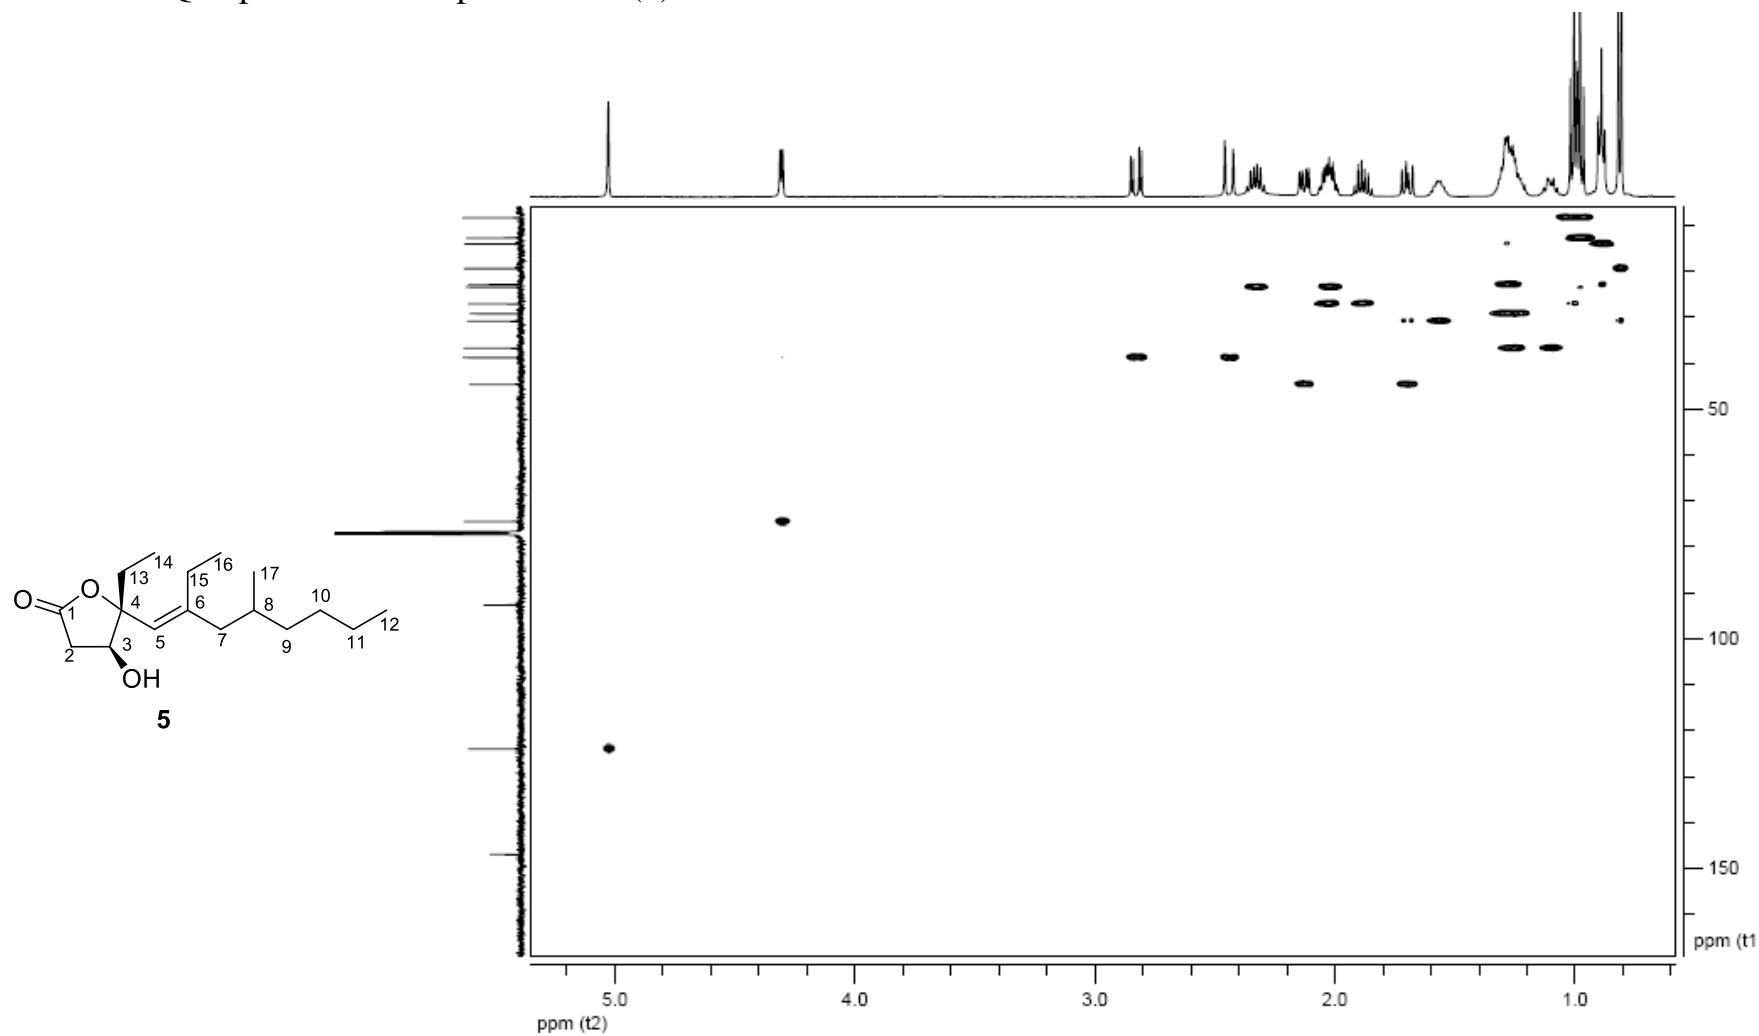

**Figure S39.** HMBC spectrum of simplexolide E (**5**) in CDCl<sub>3</sub>.

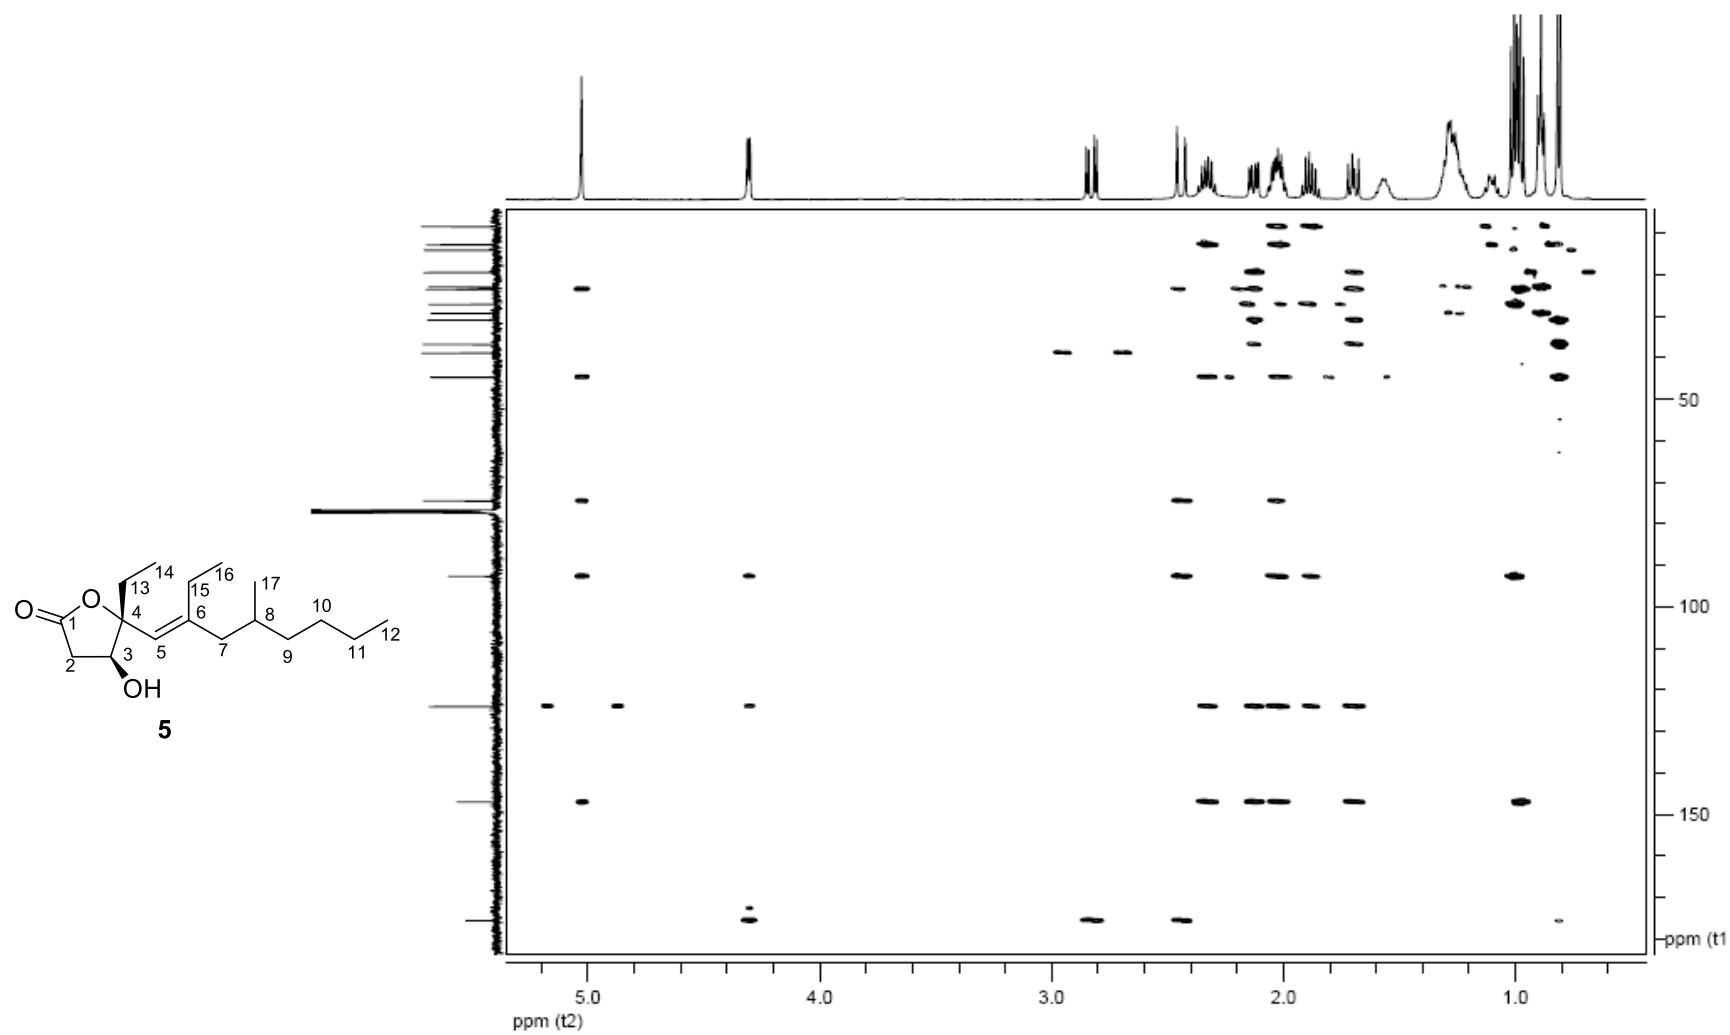

**Figure S40.** NOESY spectrum of simplexolide E (**5**) in CDCl<sub>3</sub>.

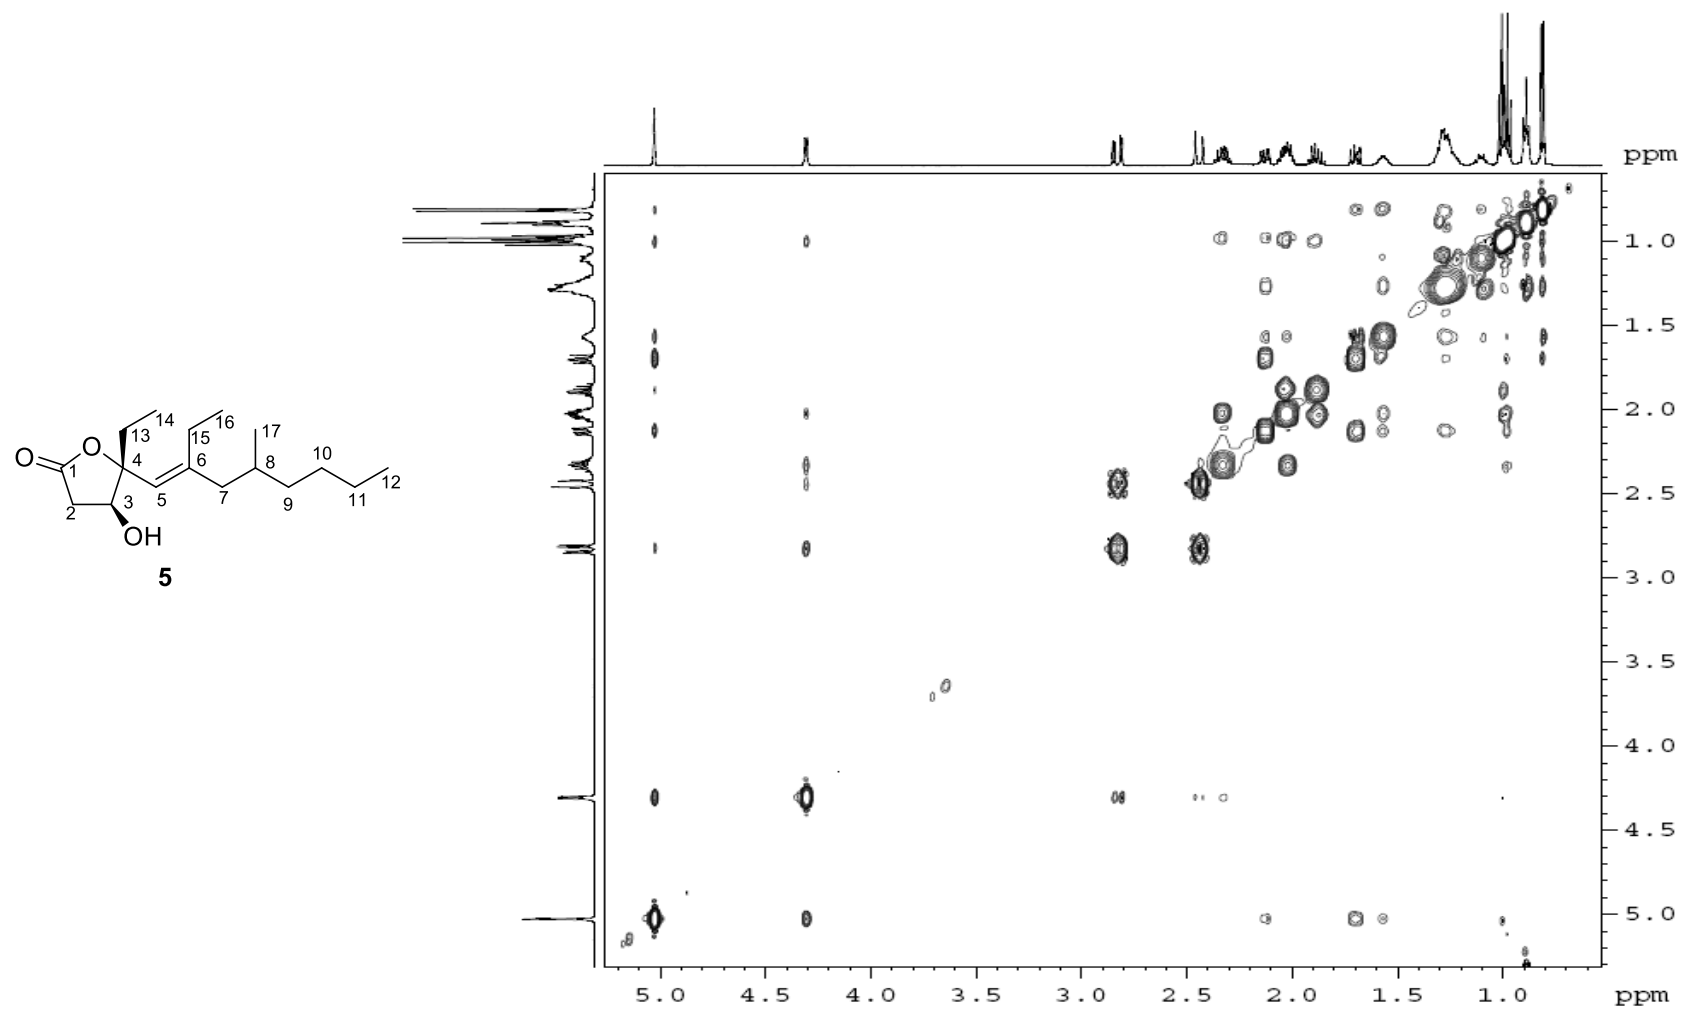

**Figure S41.** High resolution ESI mass spectrum of plakorfan A (6).

**Elemental Composition Report**

Tolerance = 10.0 PPM / DBE: min = -1.5, max = 50.0  
 Selected filters: None

Monoisotopic Mass, Even Electron Ions  
 19 formula(e) evaluated with 1 results within limits (up to 50 closest results for each mass)  
 Elements Used:

C: 5-30 H: 5-50 O: 1-5 Na: 1-1

SIPI  
 XF-26 M.W=322  
 WQ10193H1 42 (1.453) AM (Cen,6, 80.00, Ar,5000.0,325.16,0.70); Sm (SG, 2x3.00); Cm (35:55)

21-May-2010,15:13:53  
 0.00000000  
 TOF MS ES+  
 2.86e5

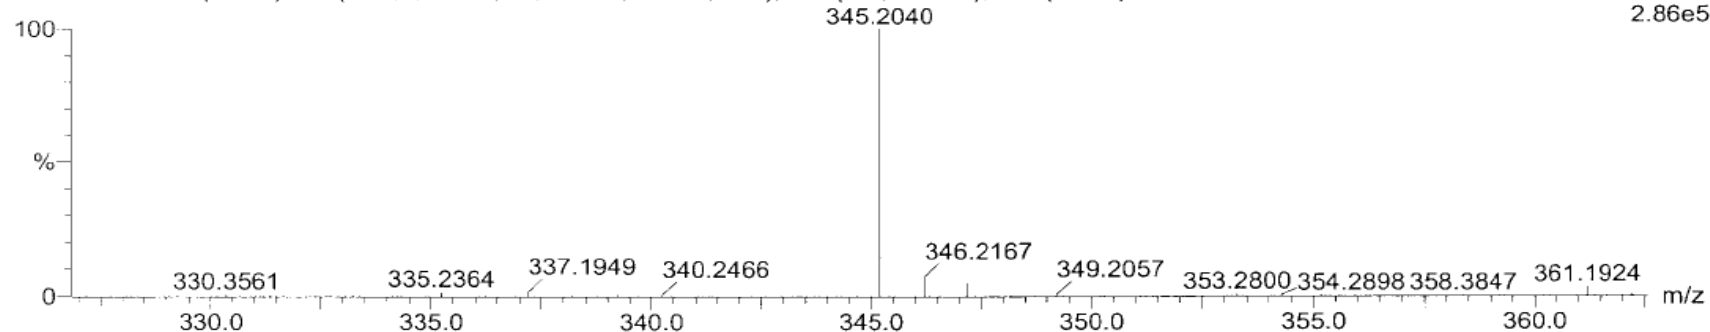

Minimum: 35.00  
 Maximum: 100.00

| Mass     | RA     | Calc. Mass | mDa  | PPM  | DBE | i-FIT   | Formula       |
|----------|--------|------------|------|------|-----|---------|---------------|
| 345.2040 | 100.00 | 345.2042   | -0.2 | -0.6 | 4.5 | 28493.4 | C19 H30 O4 Na |

Figure S42. IR spectrum of plakorfuran A (6).

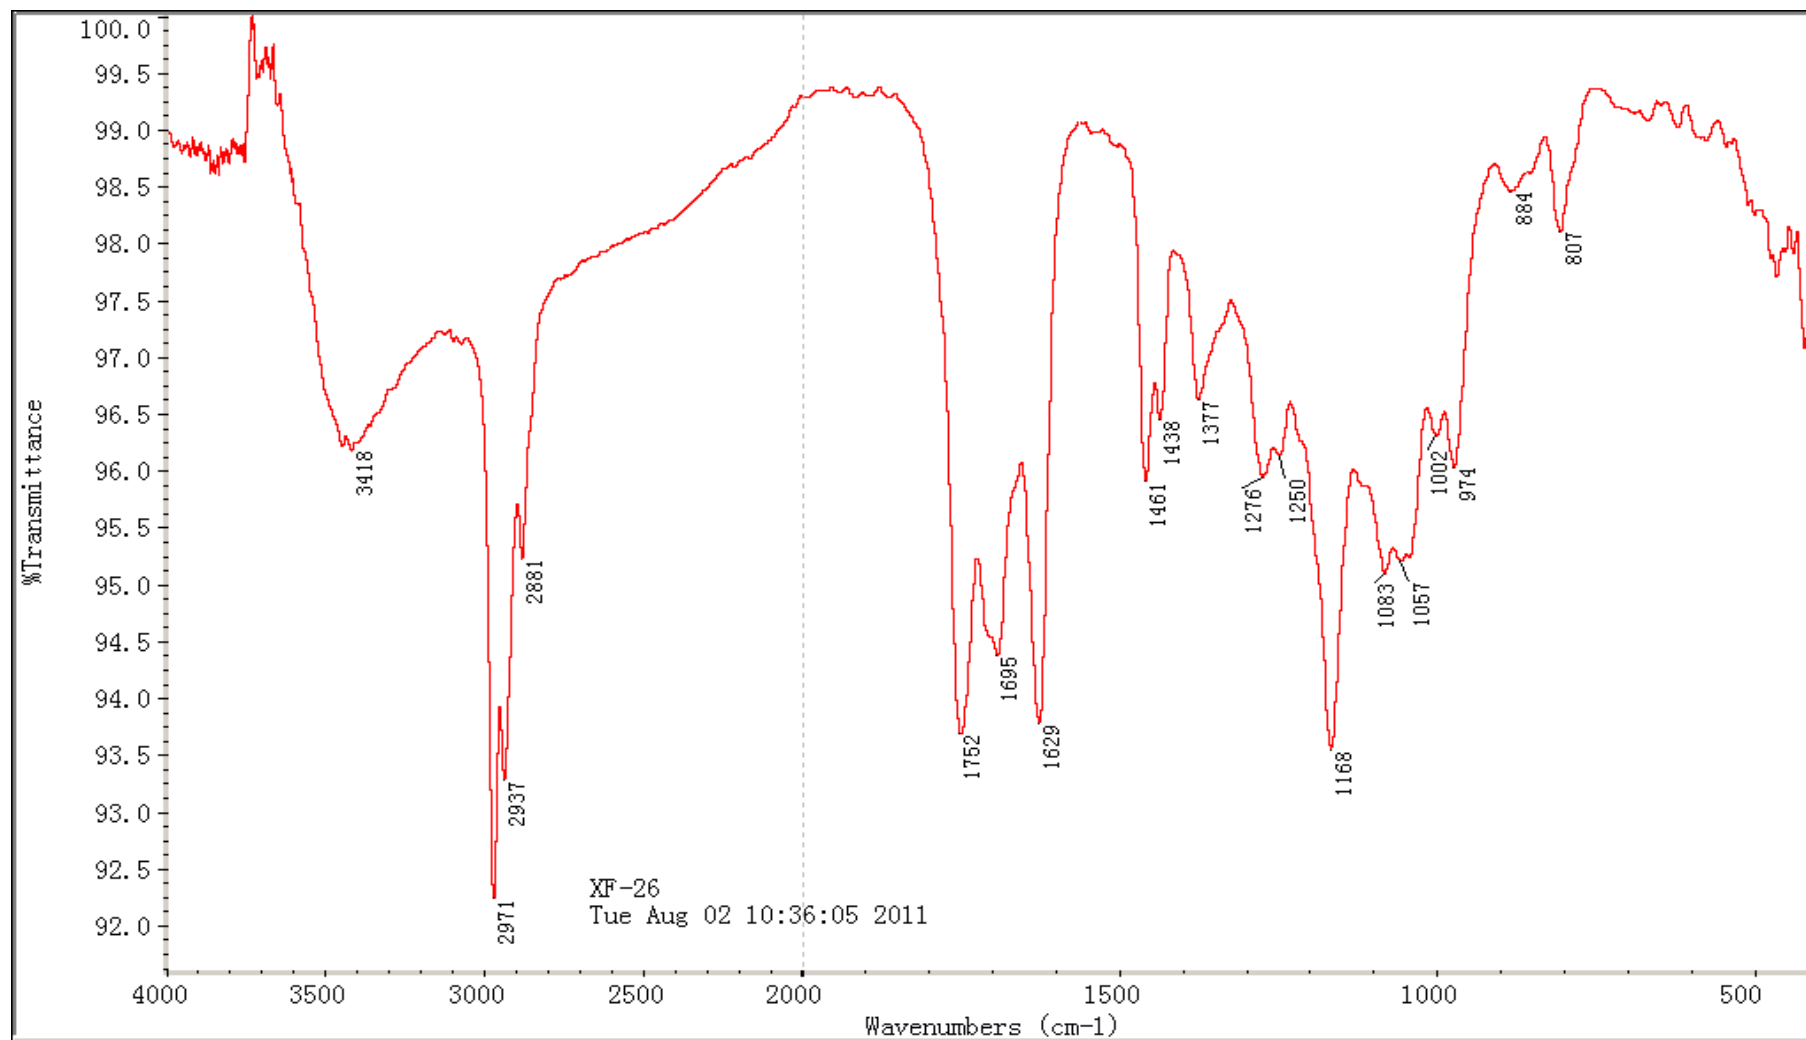

Figure S43.  $^1\text{H}$  NMR spectrum of plakorfuran A (**6**) in  $\text{CDCl}_3$ .

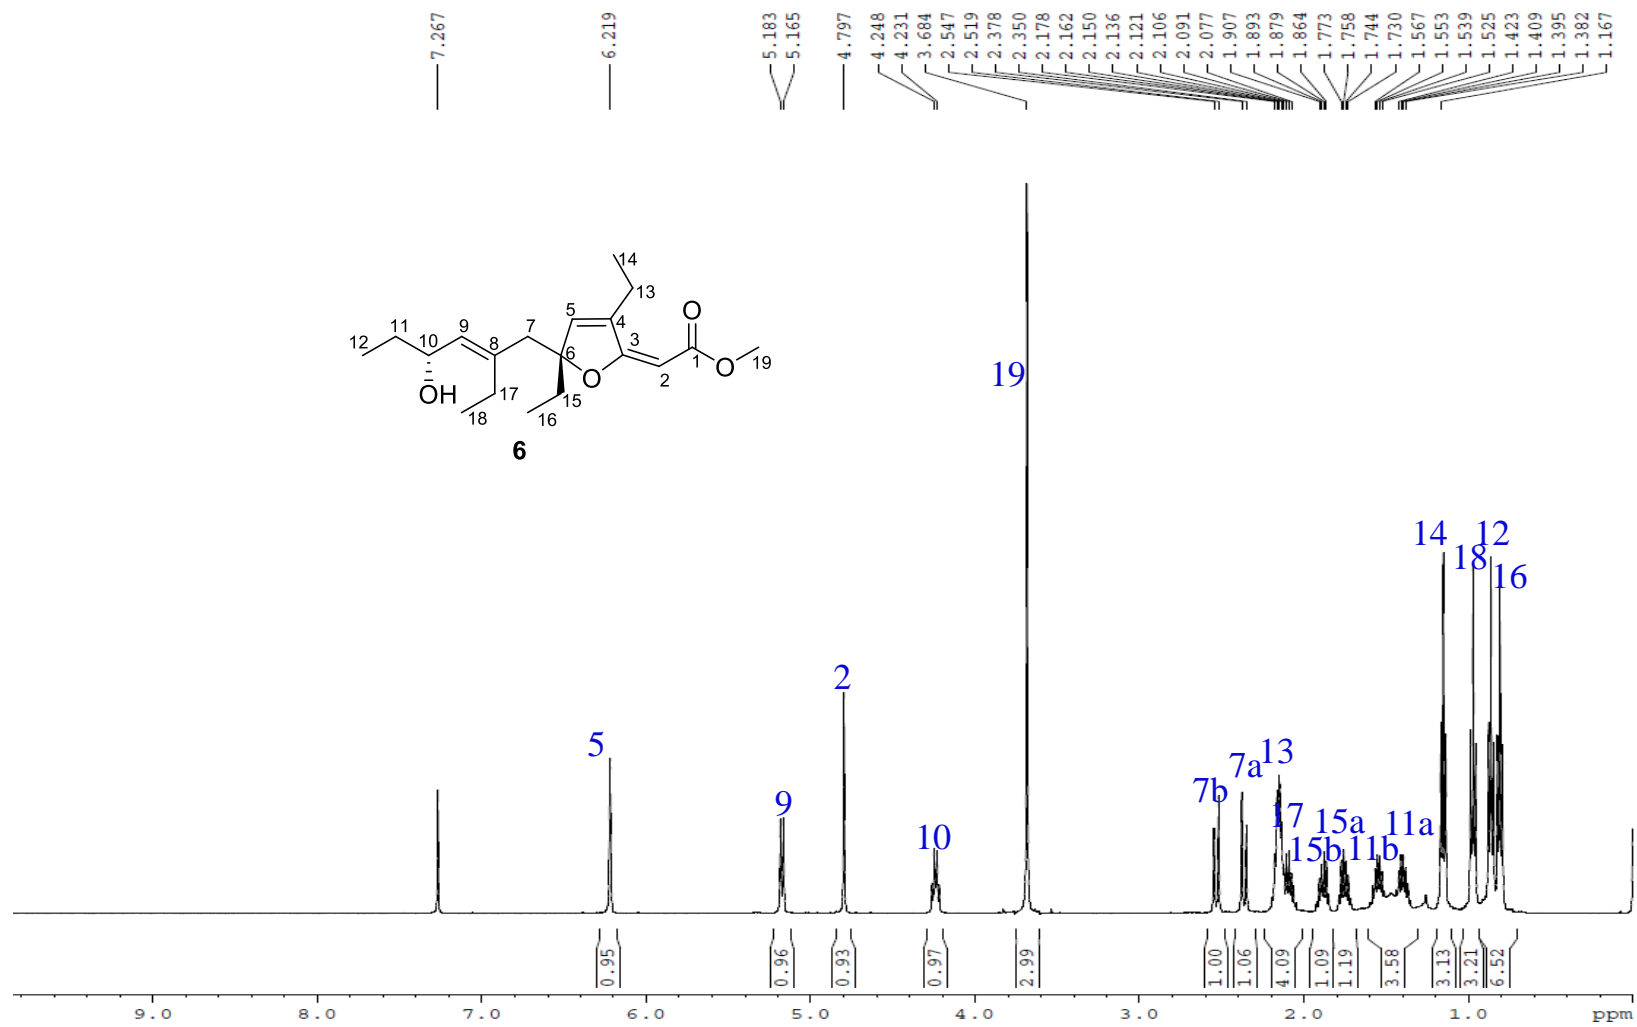

Figure S44.  $^{13}\text{C}$  NMR spectrum of plakorfuran A (**6**) in  $\text{CDCl}_3$ .

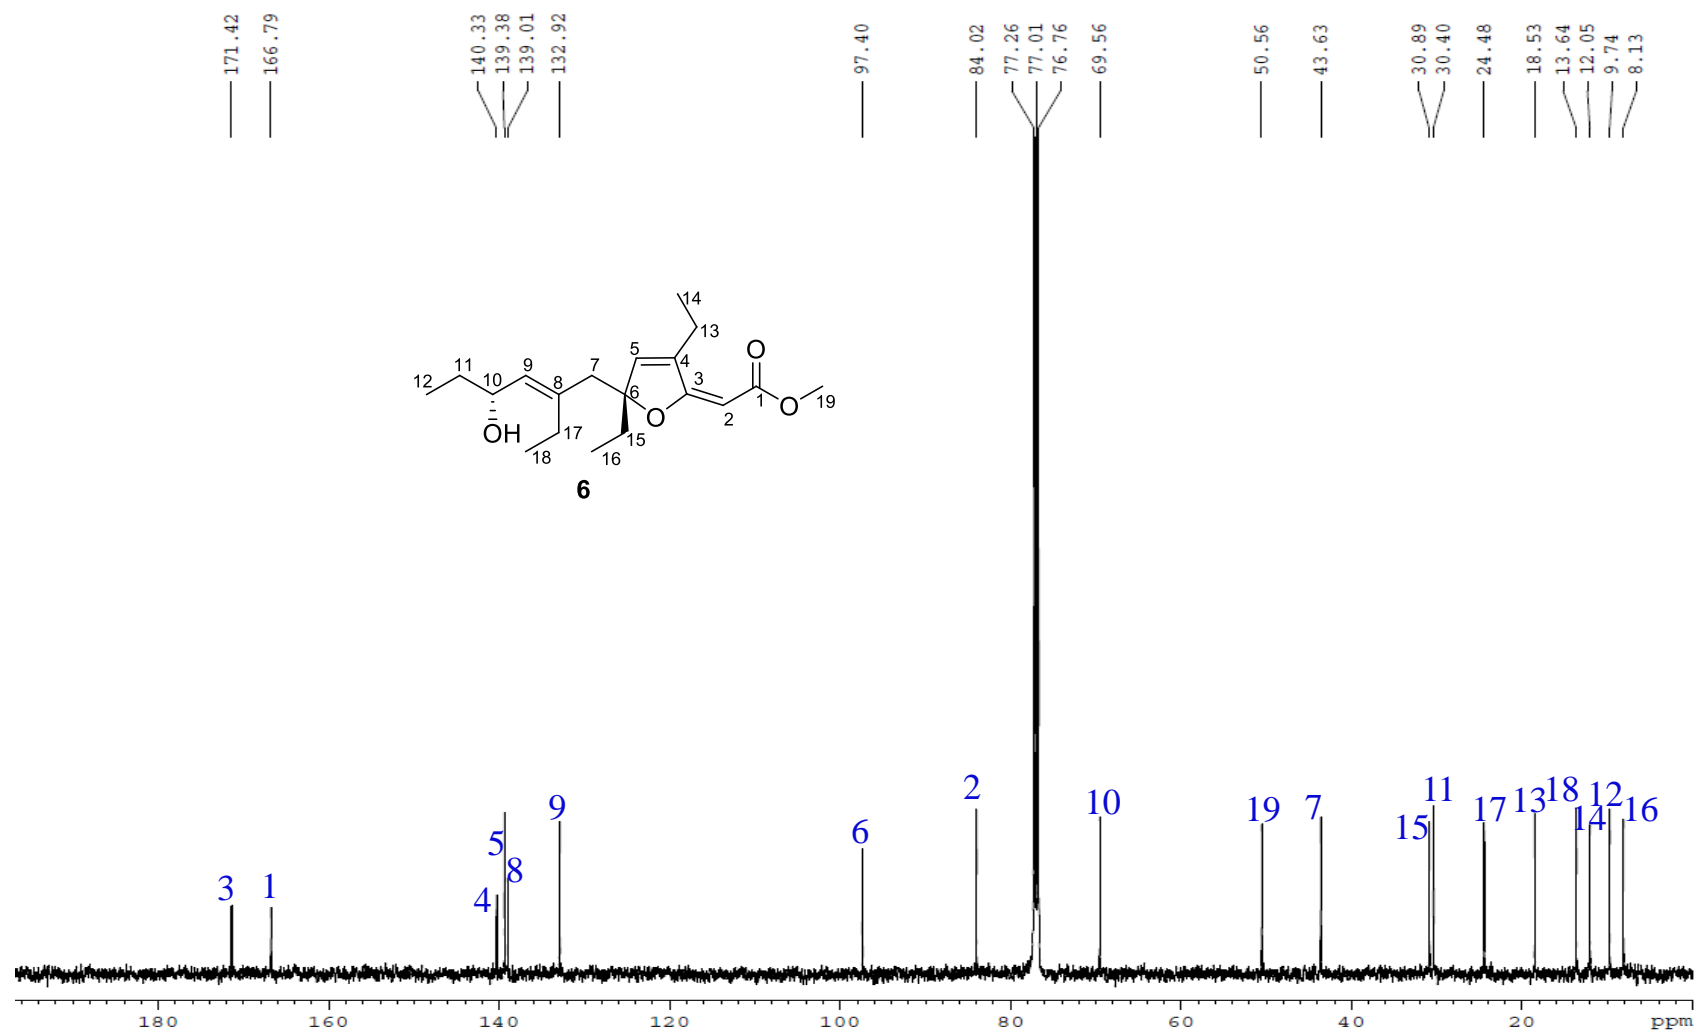

Figure S45.  $^1\text{H}$ - $^1\text{H}$  COSY spectrum of plakorfulran A (**6**) in  $\text{CDCl}_3$ .

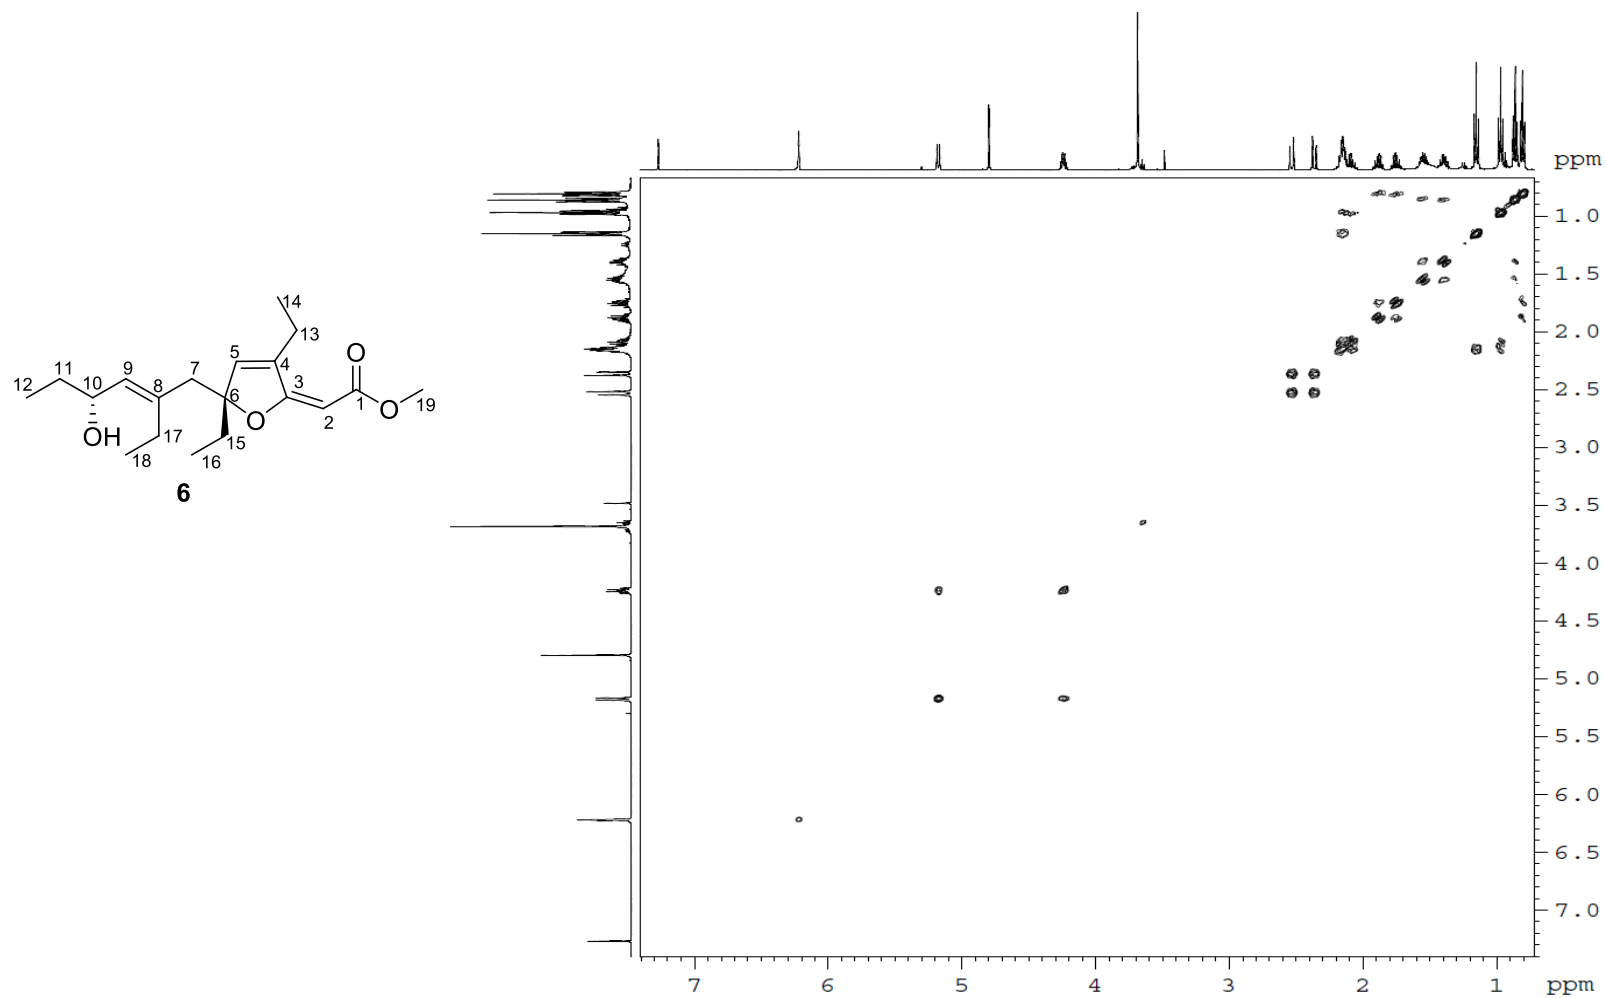



**Figure S46.** HSQC spectrum of plakorfuran A (**6**) in CDCl<sub>3</sub>.

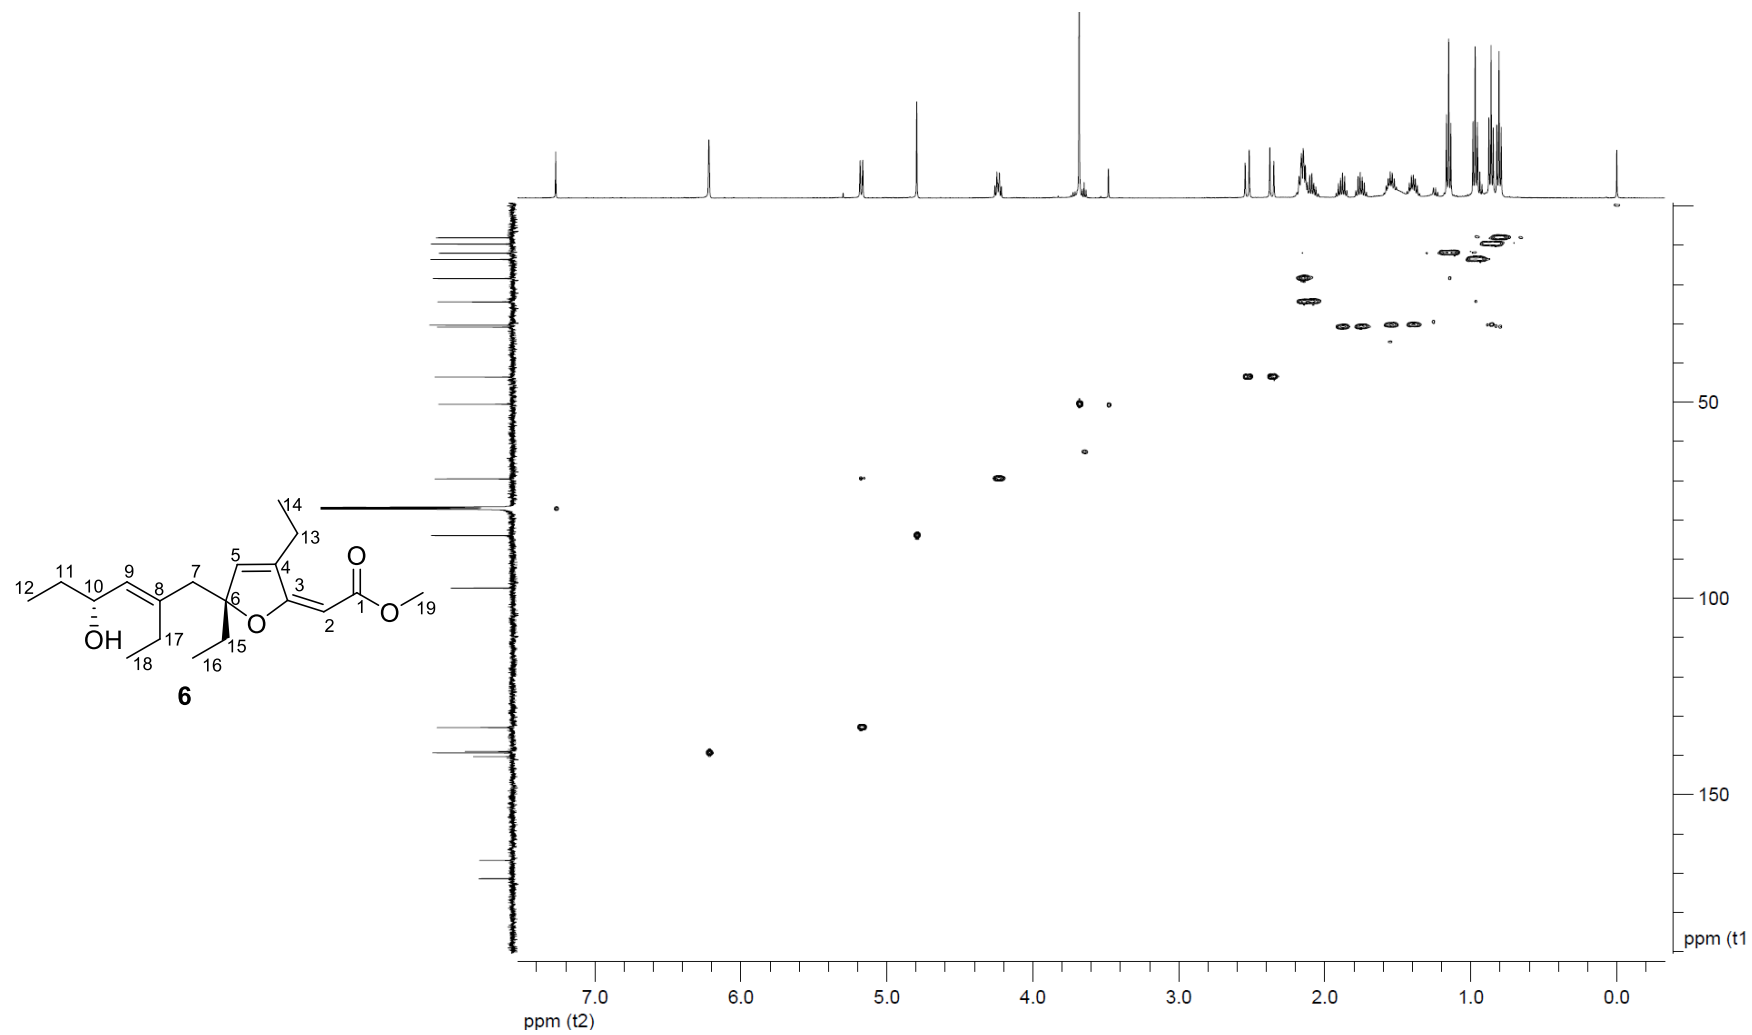



**Figure S48.** NOESY spectrum of plakorfulran A (**6**) in CDCl<sub>3</sub>.

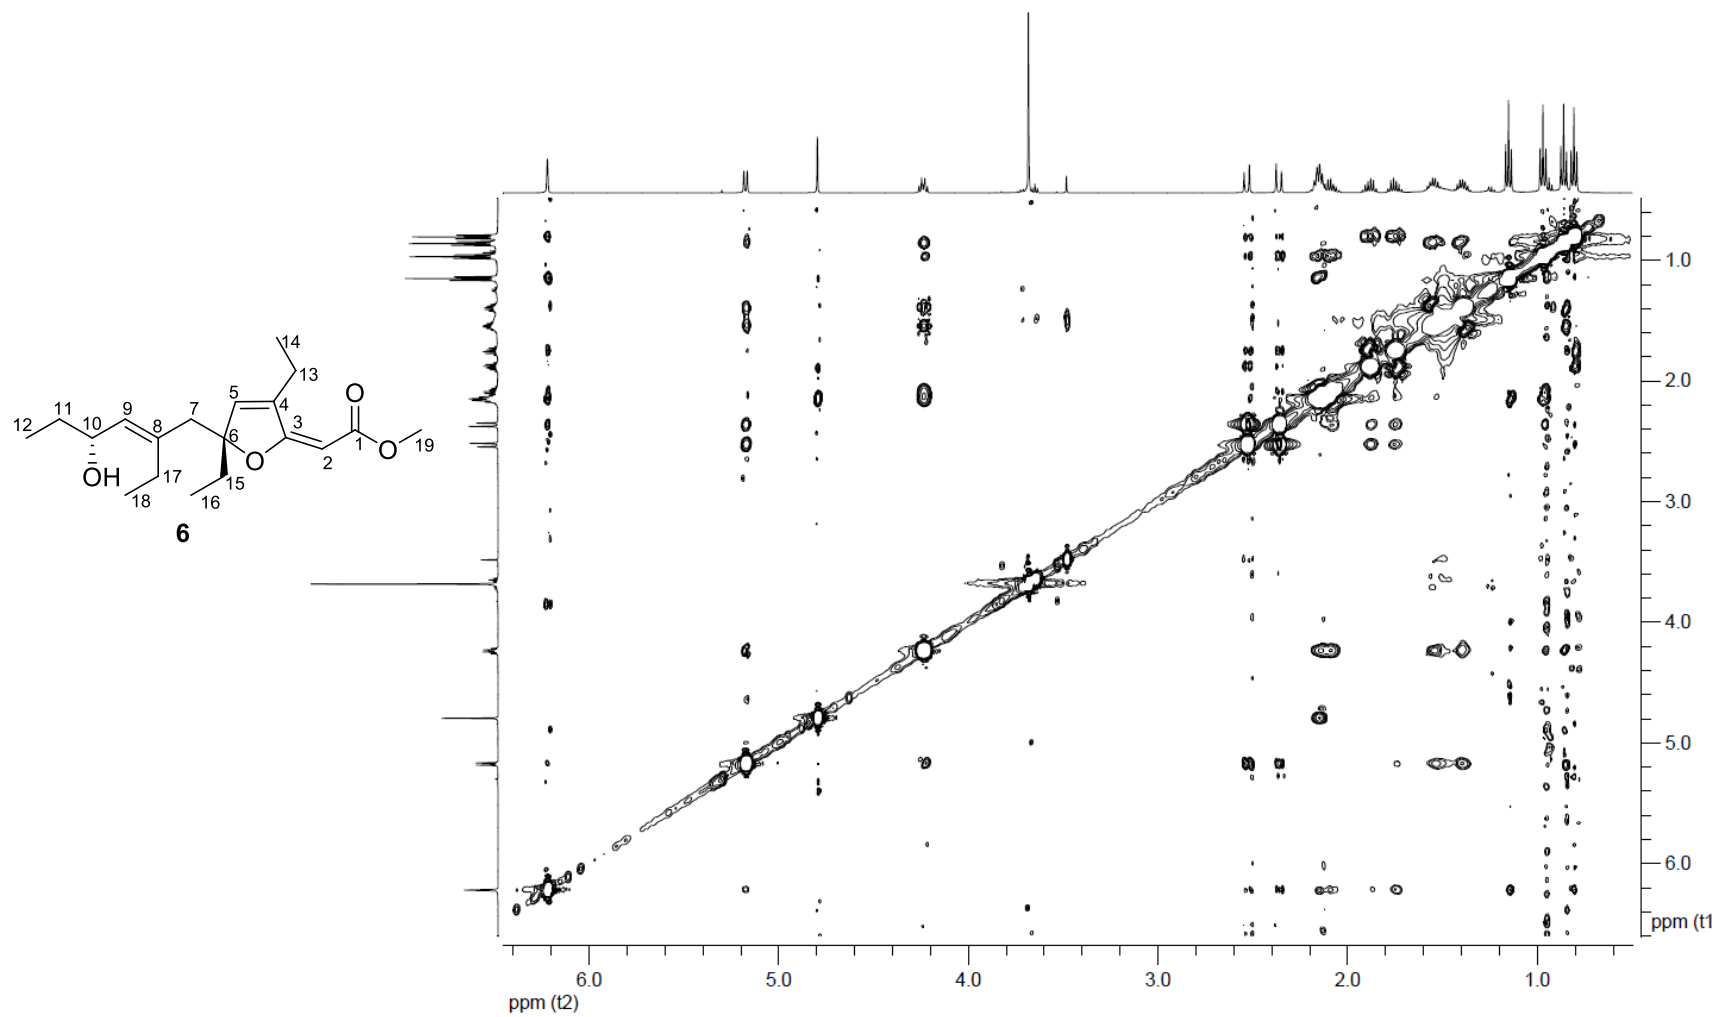

Supplement: NIHMS798098-supplement-2.pdf [file NIHMS798098-supplement-2.pdf]
